# Supplementary material for: Sustainable access to sulfonic acids from halides and thiourea dioxide with air
Source: Royal Society of Chemistry journal article supplement (doi:10.1039/d0gc03135f), 2020-01-01

# Sustainable Access to Sulfonic Acids from Halides and Thiourea Dioxide with Air

Hui Zhang,<sup>a</sup> Ming Wang <sup>\*a</sup> and Xuefeng Jiang <sup>\*a,b</sup>

<sup>a</sup> Shanghai Key Laboratory of Green Chemistry and Chemical Process, School of Chemistry and Molecular Engineering, East China Normal University, 3663 North Zhongshan Road, Shanghai 200062, P. R. China

<sup>b</sup> State Key Laboratory of Elemento-organic Chemistry, Nankai University, Tianjin 300071, P. R. China

## Supporting Information

### Table of Contents

|                                                                         |            |
|-------------------------------------------------------------------------|------------|
| <b>I. General Information.....</b>                                      | <b>S2</b>  |
| <b>II. General procedure for synthesis of aryl sulfonic acid.....</b>   | <b>S2</b>  |
| <b>III. General procedure for synthesis of alkyl sulfonic acid.....</b> | <b>S3</b>  |
| <b>IV. The optimization of reaction conditions .....</b>                | <b>S4</b>  |
| <b>V. Mechanistic study.....</b>                                        | <b>S6</b>  |
| <b>VI. Characterization of sulfonic acid product .....</b>              | <b>S13</b> |
| <b>VII. X-Ray crystal structure.....</b>                                | <b>S24</b> |

## I. General Information

$^1\text{H}$  and  $^{13}\text{C}$  NMR spectra were recorded on 400 MHz NMR spectrometers (Bruker AVANCE), using  $\text{D}_2\text{O}$ , Chemical shifts are reported in parts per million (ppm), Chemical shifts for protons are reported in part per million relative to chloroform ( $\text{D}_2\text{O}$  & 4.79), Data are represented as follows: Chemical shift, multiplicity (br = broad, s = singlet, d = triplet, q = quartet, m = multiple ), coupling constants in Hertz (Hz), integration, Mass spectra were recorded on a Shimadzu GCMS-QP2010 Ultra. IR spectra were recorded on TENSOR (27) Series FT-IR 241. Spectrometers.

## II. General procedure for synthesis of aryl sulfonic acid

Under air atmosphere, aromatic iodine **1** (0.5 mmol, 1.0 equiv.), thiourea dioxide (1.5 mmol, 3.0 equiv.),  $\text{PdCl}_2(\text{dppf})$  (0.0125 mmol, 2.5 mol %),  $\text{Cs}_2\text{CO}_3$  (1.0 mmol, 2.0 equiv.), and DMSO (5 mL) were added to a Schlenk tube. The mixture was stirred at  $100\text{ }^\circ\text{C}$  for 14 h, and the solvent was removed under vacuum. Water was added to dilute the residue, and the mixture was acidified with aq. HCl. Some insoluble impurities were filtered through a medium filter paper. The filtrate was extracted with DCM, and the aqueous layer was concentrated to remove the solvent under vacuum. Subsequently, 20 mL MeOH/DCM (1:1) was added to the residue solid. The mixture was filtered through a medium filter paper once again, and the filter cake was washed with MeOH/DCM (1:1) several times. The organic layers were combined and evaporated under vacuum. Purification by HPLC afforded aryl sulfonic acid **2** (0.1%  $\text{CH}_3\text{COOH}$  aq / trituration). The method is shown as follow:

|   | Time(min) | A%(0.1% CH <sub>3</sub> COOH aq) | B% (CH <sub>3</sub> CN) | Speed(mL/min) |
|---|-----------|----------------------------------|-------------------------|---------------|
| 1 | 0.00      | 95.0                             | 5.0                     | 3.0 mL/min    |
| 2 | 5.00      | 95.0                             | 5.0                     |               |
| 3 | 8.00      | 45.0                             | 55.0                    |               |
| 4 | 16.00     | 30.0                             | 70.0                    |               |
| 5 | 20.00     | 30.0                             | 70.0                    |               |
| 6 | 25.00     | 5.0                              | 95.0                    |               |
| 7 | 29.00     | 5.0                              | 95.0                    |               |
| 8 | 31.00     | 95.0                             | 5.0                     |               |
| 9 | 35.00     | 95.0                             | 5.0                     |               |

### III. General procedure for synthesis of alkyl sulfonic acid

Under air atmosphere, alkyl bromide (0.5 mmol, 1.0 equiv.), thiourea dioxide (1.5 mmol, 3.0 equiv.), Cs<sub>2</sub>CO<sub>3</sub> (1.0 mmol, 2.0 equiv.), KI (1.0 mmol, 2.0 equiv.) and DMSO (5 mL) were added to a Schlenk tube. The mixture was stirred at 100 °C for 14 h, and the solvent was removed under vacuum. Water was added to dilute the residue, and the mixture was acidified with aq. HCl. Some insoluble impurities were filtered through a medium filter paper. The filtrate was extracted with DCM, and the aqueous layer was concentrated to remove the solvent under vacuum. Subsequently, 20 mL MeOH/DCM (1:1) was added to the residue solid. The mixture was filtered through a medium filter paper once again, and the filter cake was washed with MeOH/DCM (1:1) several times. The organic layers were combined and evaporated under vacuum. Purification by HPLC afforded alkyl sulfonic acid **3**. The method reference the preparation of aryl sulfonic acid.

## IV. The optimization of reaction conditions

Table S1: Solvent optimization

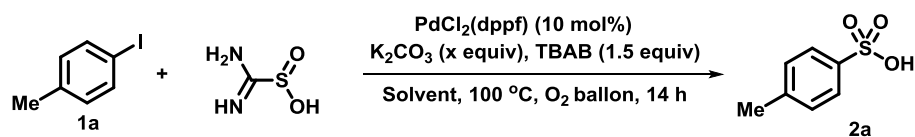

| Entry | Base                             | Solvent                | Yield <sup>[a]</sup> |
|-------|----------------------------------|------------------------|----------------------|
| 1     | $\text{K}_2\text{CO}_3$ (3 eq)   | MeCN                   | Trace                |
| 2     | $\text{K}_2\text{CO}_3$ (3 eq)   | $\text{CCl}_3\text{H}$ | Trace                |
| 3     | $\text{K}_2\text{CO}_3$ (3 eq)   | Dioxane                | 5%                   |
| 4     | $\text{K}_2\text{CO}_3$ (3 eq)   | DCE                    | Trace                |
| 5     | $\text{K}_2\text{CO}_3$ (3 eq)   | $\text{H}_2\text{O}$   | Trace                |
| 6     | $\text{K}_2\text{CO}_3$ (3 eq)   | Toluene                | Trace                |
| 7     | $\text{K}_2\text{CO}_3$ (3 eq)   | DMF                    | 62 %                 |
| 8     | $\text{K}_2\text{CO}_3$ (3 eq)   | DMSO                   | 49 %                 |
| 9     | $\text{K}_2\text{CO}_3$ (2 eq)   | DMF                    | 35 %                 |
| 10    | $\text{K}_2\text{CO}_3$ (2 eq)   | DMSO                   | 79 %                 |
| 11    | $\text{K}_2\text{CO}_3$ (1.5 eq) | DMF                    | 6 %                  |
| 12    | $\text{K}_2\text{CO}_3$ (1.5 eq) | DMSO                   | 66 %                 |

[a]Yield is determined by LC-MS using 4-chlorobenzenesulfonic acid as an internal standard.

**Table S2 Base optimization**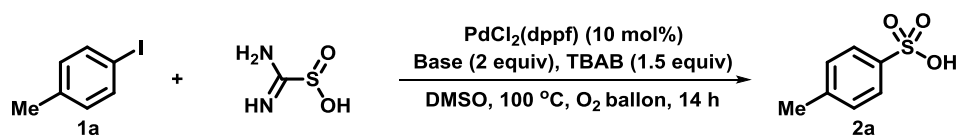

| Entry | Base                     | Yield <sup>[a]</sup> |
|-------|--------------------------|----------------------|
| 1     | KOH                      | 67%                  |
| 2     | $\text{Cs}_2\text{CO}_3$ | >95%                 |
| 3     | $\text{K}_3\text{PO}_4$  | 88%                  |
| 4     | $\text{NaHCO}_3$         | 85%                  |
| 5     | DBU                      | 85%                  |
| 6     | DIPEA                    | 85%                  |
| 7     | DABCO                    | 75%                  |

[a] Yield is determined by LC-MS using 4-chlorobenzenesulfonic acid as an internal standard

**Table S3 Pd catalyst optimization**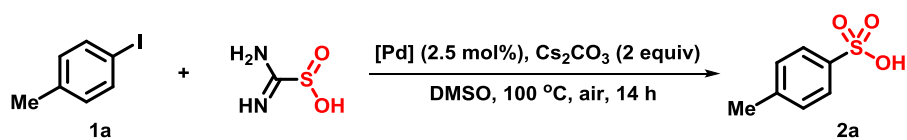

| Entry | [Pd]                         | Yield <sup>[a]</sup> |
|-------|------------------------------|----------------------|
| 1     | $\text{PdCl}_2$              | 6%                   |
| 2     | $\text{Pd}(\text{OAc})_2$    | 6%                   |
| 3     | $\text{Pd}(\text{dba})_2$    | 5%                   |
| 4     | $\text{Pd}(\text{acac})_2$   | 10%                  |
| 5     | $\text{PdCl}_2(\text{dppm})$ | 10%                  |
| 6     | $\text{PdCl}_2(\text{dppp})$ | 54%                  |
| 7     | $\text{PdCl}_2(\text{dppf})$ | 87%                  |

[a] Yield is determined by LC-MS using 4-chlorobenzenesulfonic acid as an internal standard

## V. Mechanistic study

(1)

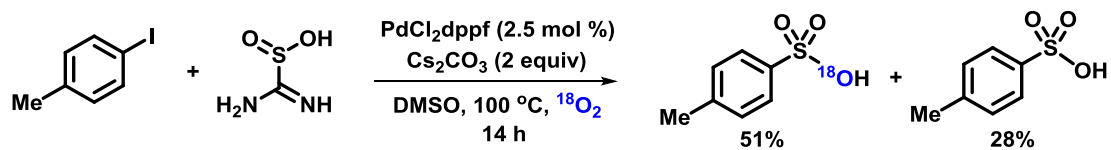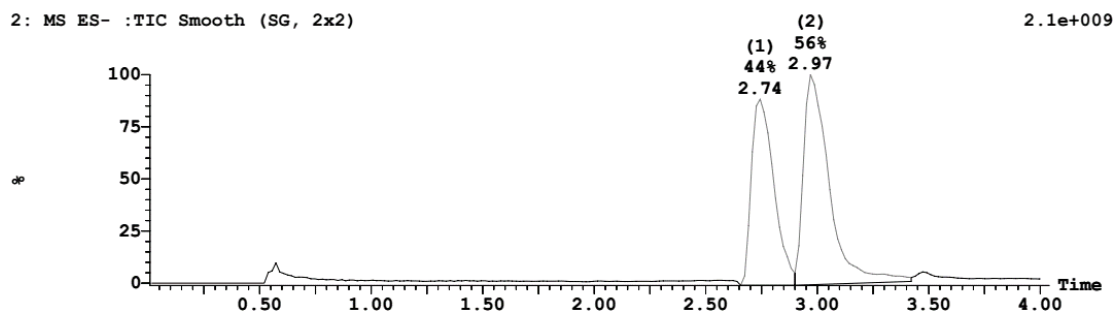

| Peak ID | Compound | Time | Mass Found |
|---------|----------|------|------------|
| 1       |          | 2.74 |            |

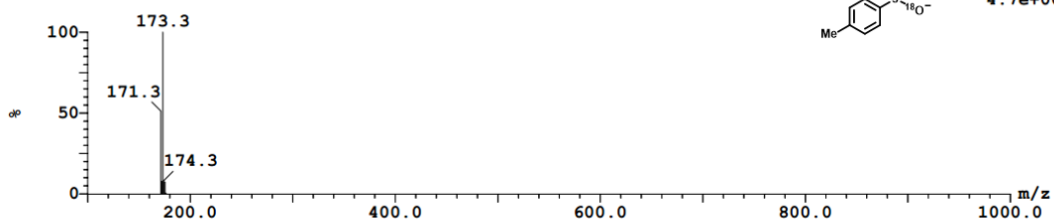

| Peak ID | Compound | Time | Mass Found |
|---------|----------|------|------------|
| 2       |          | 2.97 |            |

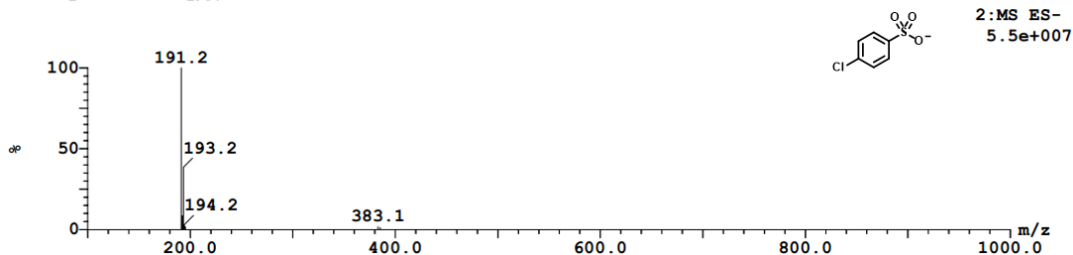

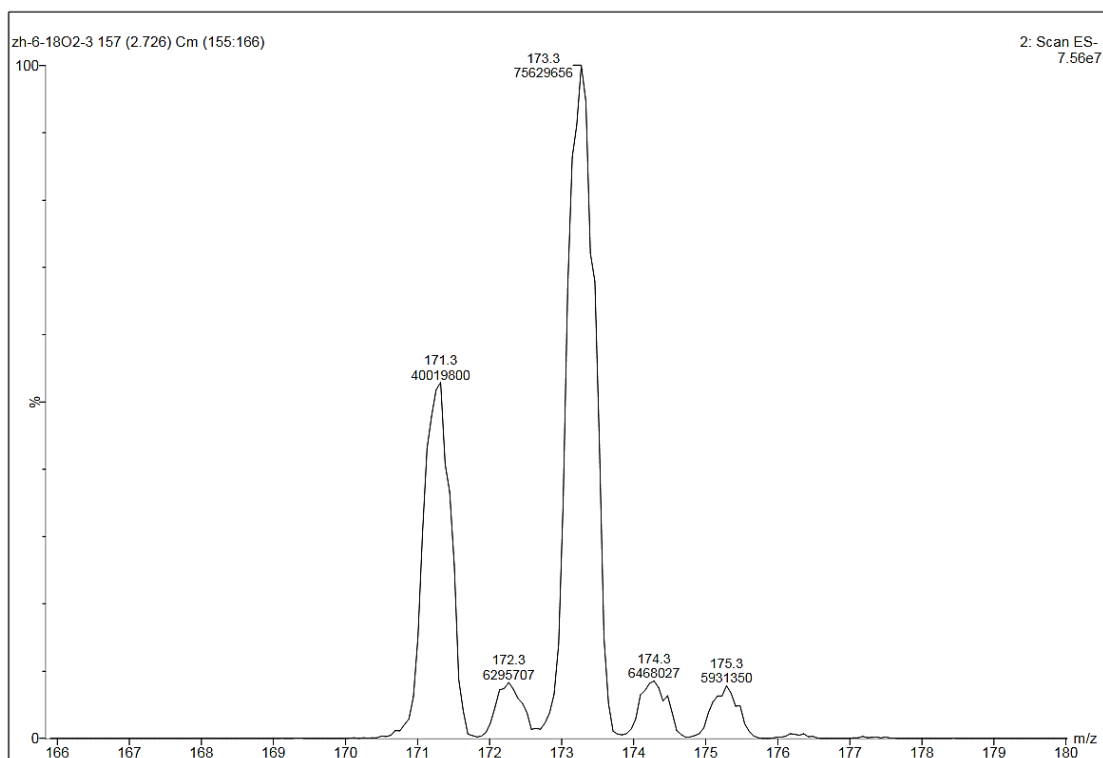

(2)

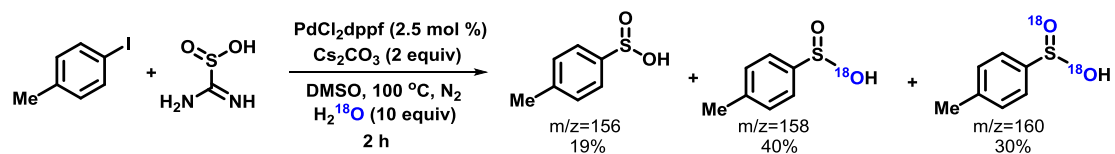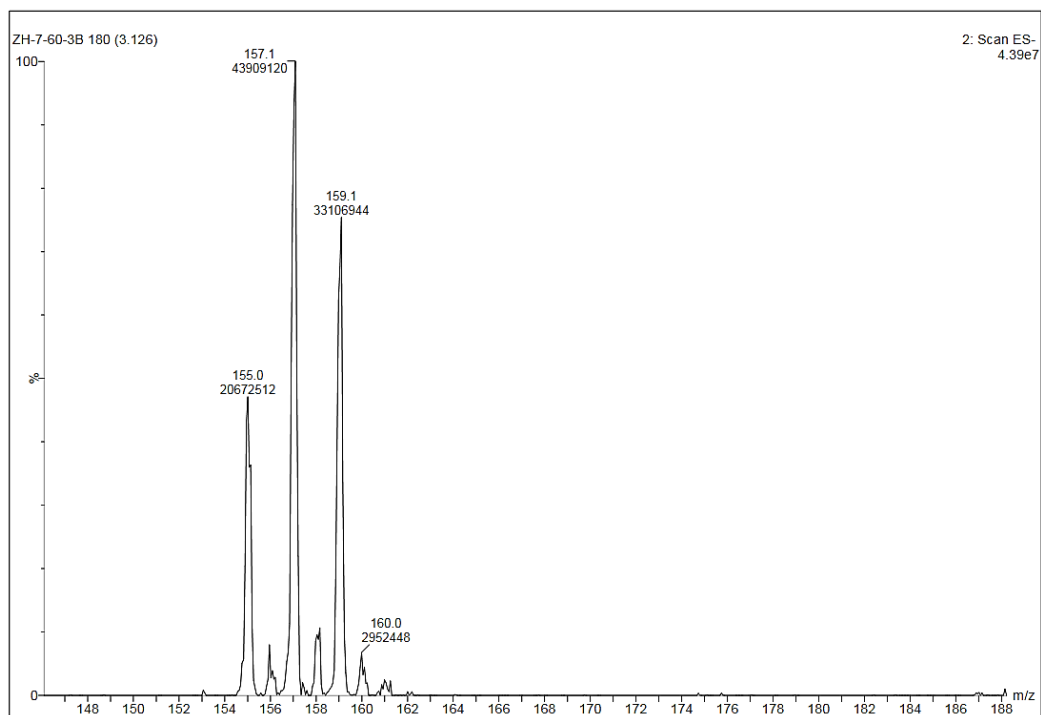

(3)

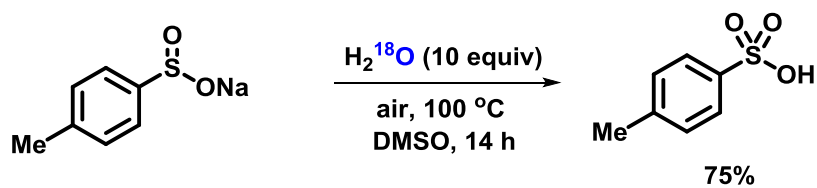

2: MS ES- :TIC

7.8e+008

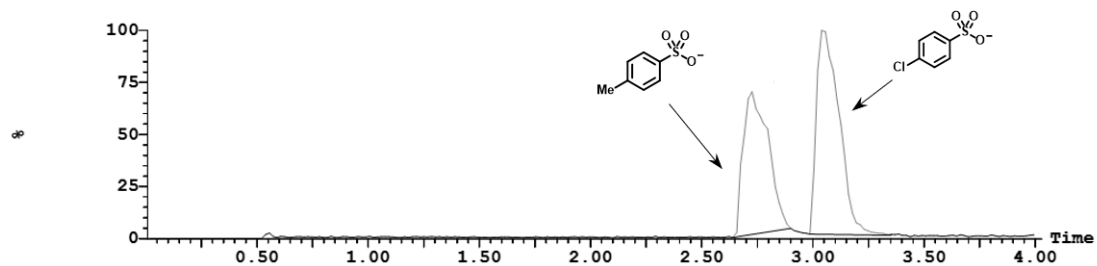

| Peak ID | Compound | Time | Mass Found |
|---------|----------|------|------------|
| 1       |          | 2.73 |            |

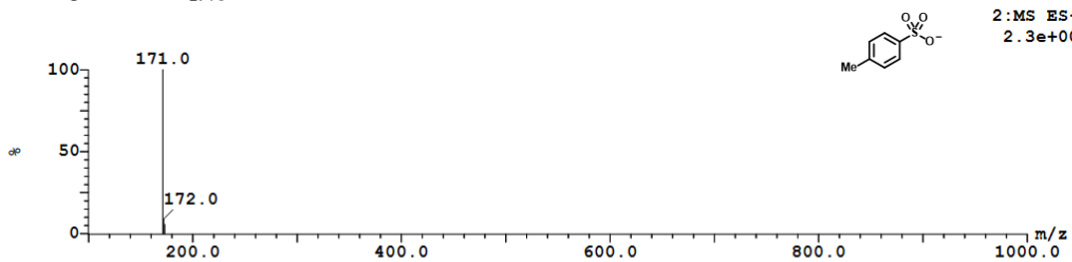

2:MS ES-  
2.3e+007

| Peak ID | Compound | Time | Mass Found |
|---------|----------|------|------------|
| 2       |          | 3.04 |            |

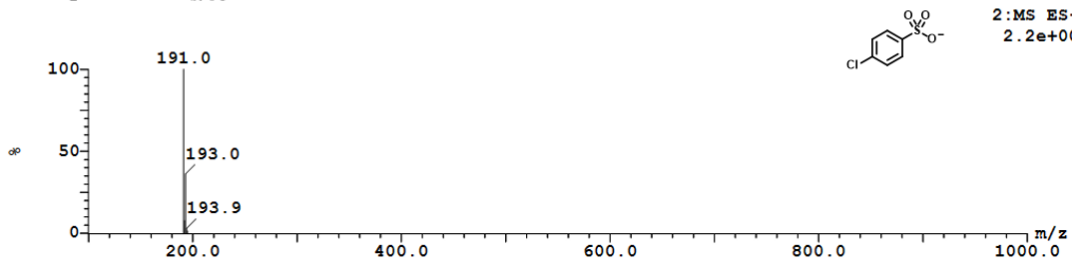

2:MS ES-  
2.2e+007

(4)

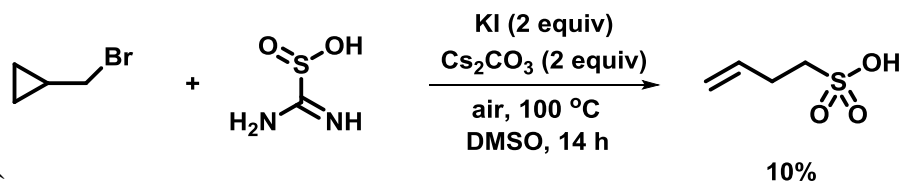



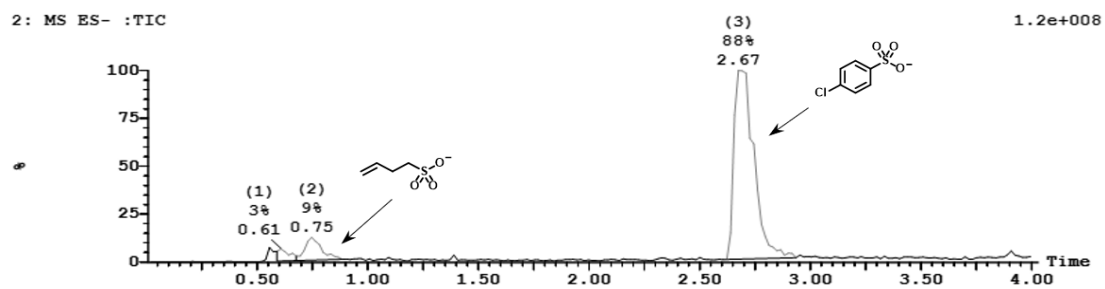

Peak ID Compound Time Mass Found

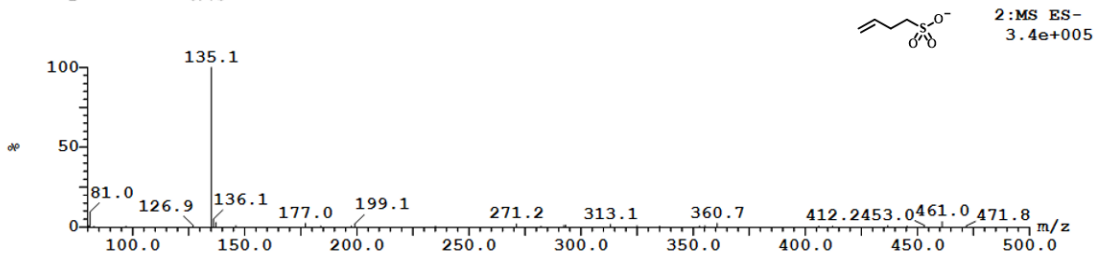

Peak ID Compound Time Mass Found

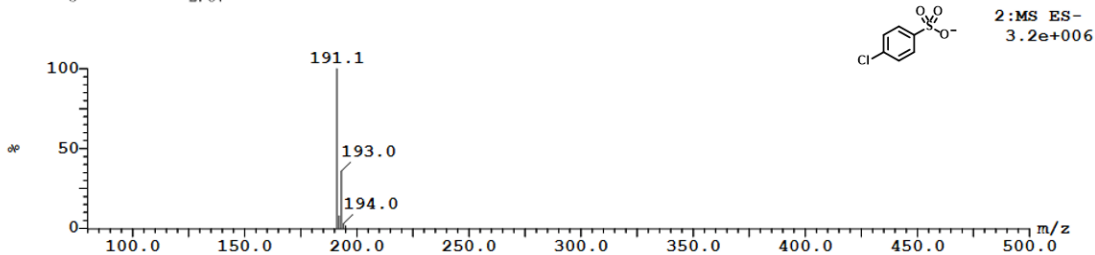

## (5) Control Experiments

All the reactions were conducted under standard conditions with certain amounts of additives.<sup>1</sup> The corresponding yields were determined by LC-MS using 4-chlorobenzenesulfonic acid as an internal standard.

**Table S3: Control Experiments**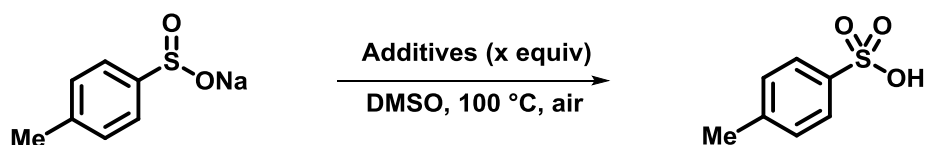

| Entry | Additives (x equiv)                | Funcations                            | Yields |
|-------|------------------------------------|---------------------------------------|--------|
| 1     | -                                  | -                                     | 84%    |
| 2     | 1,3-diphenylisobenefuran (1 equiv) | O <sub>2</sub> <sup>-</sup> inhibitor | 75%    |
| 3     | 9,10-dimethylanthr (1 equiv)       | O <sub>2</sub> <sup>-</sup> inhibitor | 86%    |
| 4     | NaN <sub>3</sub> (1 equiv)         | HO <sup>•</sup> inhibitor             | 72%    |
| 5     | Co(acac) <sub>2</sub> (0.06 equiv) | <sup>1</sup> O <sub>2</sub> inhibitor | 89%    |
| 6     | <sup>t</sup> BuOH (1 equiv)        | HO <sup>•</sup> inhibitor             | 72%    |

**(6) Studies on Hydrogen Peroxide**

The amount of H<sub>2</sub>O<sub>2</sub> was determined by titration with iodide ion, as described previously in the literature<sup>2,3</sup> in which the reflux procedures was instead by stirring at room temperature. In an iodometric titration, the formation of I<sub>3</sub><sup>-</sup> and the consumption of H<sub>2</sub>O<sub>2</sub> follows a one-to-one ratio as eqs S1-3. The concentration H<sub>2</sub>O<sub>2</sub> can be derived from the concentration of I<sub>3</sub><sup>-</sup> (Abs@361 nm = εb[I<sub>3</sub><sup>-</sup>]). All iodometric titrations are conducted anaerobically to avoid the oxidation of I<sup>-</sup> to I<sub>3</sub><sup>-</sup> by O<sub>2</sub>.

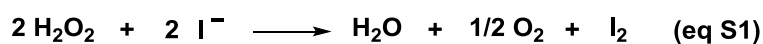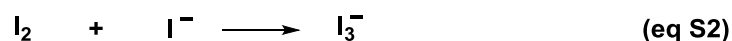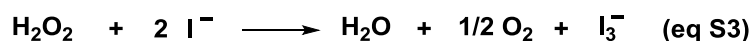

**Figure S2: Ultraviolet-visible Absorption of Reaction Systems**

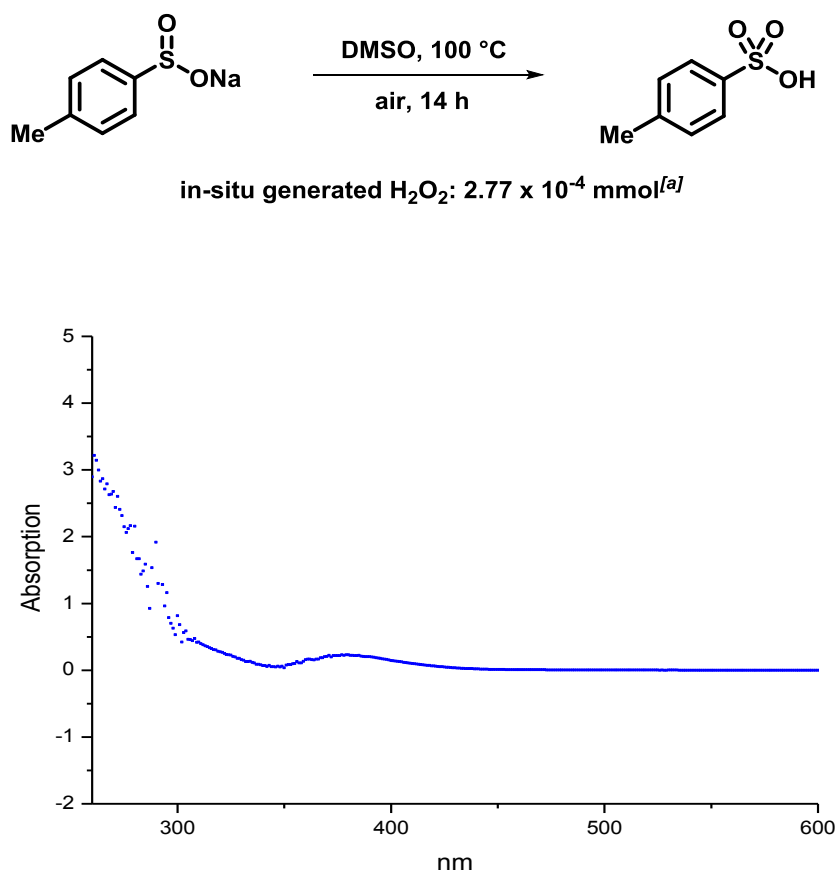

[a] Experiments data based on the UV-Vis Absorption of  $\text{I}^{3-}$  Generated by different concentration of  $\text{H}_2\text{O}_2$  and standard curve of the amount of  $\text{I}^{3-}$  for its quantitative studies.

### (7) Electrochemical Measurements

Cyclic voltammetry was performed in a three-electrode cell connected to a schlenk line under nitrogen at room temperature. Samples were prepared with 0.4 mmol of substrate in 10 mL of 0.1 M tetra-n-butylammonium hexafluorophosphate in dry, degassed N, N-Dimethylformamide. Measurements employed a platinum plate working electrode, platinum wire counter electrode, saturated calomel electrode as reference electrode, and a scan rate of 100 mV/s, ranging from 0 V to 3.0 V. Reductions were measured by scanning potentials in the negative direction and oxidations in the positive direction; the platinum plate working electrode was polished between each scan.

**Figure S3: Cyclic Voltammogram of Sodium *p*-Toluenesulfinate**

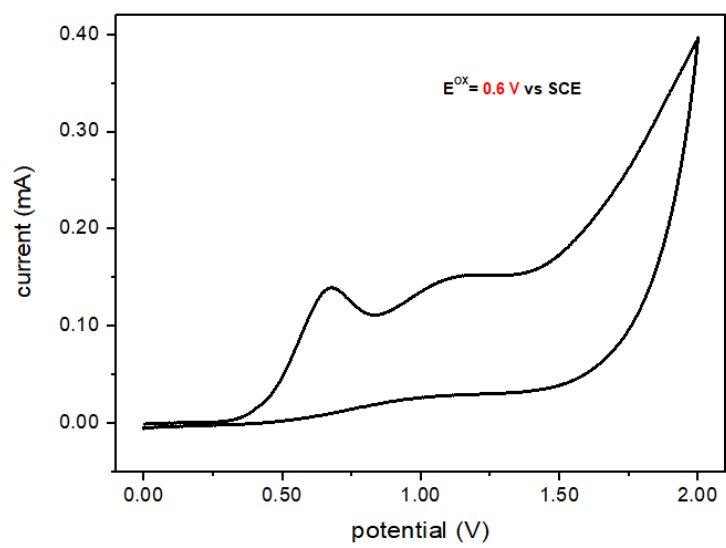

## VI. Characterization of sulfonic acid product

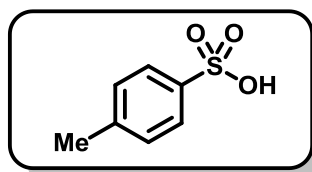

**(4-methylbenzenesulfonic acid) 2a.** Prepared following general procedure using aryl iodine **1a** (109.1 mg, 0.5 mmol), thiourea dioxide (162.2 mg, 1.5 mmol), PdCl<sub>2</sub>(dppf) (9.2 mg, 0.0125 mmol), Cs<sub>2</sub>CO<sub>3</sub> (325.8 mg, 1.0 mmol), DMSO (5 mL), the reaction mixture was stirred at 100 °C for 14 h to afford product **2a** in 78% yield. <sup>1</sup>H NMR (400 MHz, D<sub>2</sub>O) δ 7.56 (d, J = 8.0 Hz, 2H), 7.21 (d, J = 8.0 Hz, 2H), 2.24 (s, 3H). <sup>13</sup>C NMR (100 MHz, D<sub>2</sub>O) δ 142.4, 139.4, 129.3, 125.3, 20.4. IR ν 1477, 1161, 1033, 816, 686, 565 cm<sup>-1</sup>. HRMS (ESI) for C<sub>7</sub>H<sub>7</sub>O<sub>3</sub>S: Calculated: 171.0121, [M-H]<sup>-</sup> found: 171.0112.

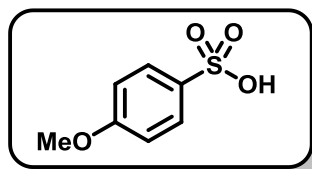

**(4-methoxybenzenesulfonic acid) 2b.** Prepared following general procedure using aryl iodine **1b** (117.1 mg, 0.5 mmol), thiourea dioxide (162.2 mg, 1.5 mmol), PdCl<sub>2</sub>(dppf) (9.2 mg, 0.0125 mmol), Cs<sub>2</sub>CO<sub>3</sub> (325.8 mg, 1.0 mmol), DMSO (5 mL), the reaction mixture was stirred at 100 °C for 14 h to afford product **2b** in 71% yield. <sup>1</sup>H NMR (400 MHz, D<sub>2</sub>O) δ 7.66 – 7.64 (m, 2H), 6.92 (dd, J = 6.8, 2.0 Hz, 2H), 3.73 (s, 3H). <sup>13</sup>C NMR (100 MHz, D<sub>2</sub>O) δ 161.1, 134.9, 127.3, 114.0, 55.5. IR ν 1598, 1226, 1091, 1024, 835, 698 cm<sup>-1</sup>. HRMS (ESI) for C<sub>7</sub>H<sub>7</sub>O<sub>4</sub>S: Calculated: 187.0071, [M-H]<sup>-</sup> found: 187.0061.

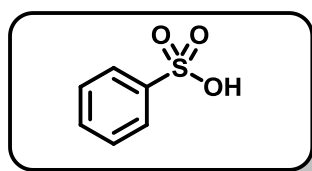

**(benzenesulfonic acid) 2c.** Prepared following general procedure using aryl iodine **1c** (102.0 mg, 0.5 mmol), thiourea dioxide (162.2 mg, 1.5 mmol), PdCl<sub>2</sub>(dppf) (9.2 mg, 0.0125 mmol), Cs<sub>2</sub>CO<sub>3</sub> (325.8 mg, 1.0 mmol), DMSO (5 mL), the reaction mixture was stirred at 100 °C for 14 h to afford product **2c** in 86% yield. <sup>1</sup>H NMR (400 MHz, D<sub>2</sub>O) δ 7.85 (dd, J = 8.0, 1.6 Hz, 2H), 7.63 – 7.52 (m, 3H). <sup>13</sup>C NMR (100 MHz, D<sub>2</sub>O) δ 142.3, 131.7, 129.1, 125.4. IR ν 1658, 1446, 1178, 1126, 1018, 733 cm<sup>-1</sup>. HRMS (ESI) for C<sub>6</sub>H<sub>5</sub>O<sub>3</sub>S: Calculated: 156.9965,

[M-H]<sup>-</sup> found: 156.9955.

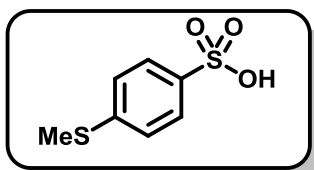

**(4-(methylthio)benzenesulfonic acid) 2d.** Prepared following general procedure using aryl iodide **1d** (125.1 mg, 0.5 mmol), thiourea dioxide (162.2 mg, 1.5 mmol), PdCl<sub>2</sub>(dppf) (9.2 mg, 0.0125 mmol), Cs<sub>2</sub>CO<sub>3</sub> (325.8 mg, 1.0 mmol), DMSO (5 mL), the reaction mixture was stirred at 100 °C for 14 h to afford product **2d** in 53% yield. <sup>1</sup>H NMR (400 MHz, D<sub>2</sub>O) δ 7.72 (d, *J* = 8.4 Hz, 2H), 7.40 (d, *J* = 8.4 Hz, 2H), 2.53 (s, 3H). <sup>13</sup>C NMR (100 MHz, D<sub>2</sub>O) δ 142.8, 138.7, 126.0, 125.8, 14.1. IR ν 1653, 1508, 1084, 1020, 833, 675 cm<sup>-1</sup>. HRMS (ESI) for C<sub>7</sub>H<sub>7</sub>O<sub>3</sub>S<sub>2</sub>: Calculated: 202.9842, [M-H]<sup>-</sup> found: 202.9834.

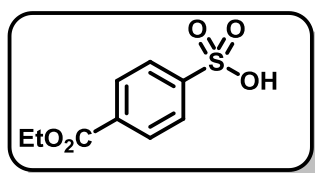

**(4-(ethoxycarbonyl)benzenesulfonic acid) 2e.** Prepared following general procedure using aryl iodide **1e** (138.0 mg, 0.5 mmol), thiourea dioxide (162.2 mg, 1.5 mmol), PdCl<sub>2</sub>(dppf) (9.2 mg, 0.0125 mmol), Cs<sub>2</sub>CO<sub>3</sub> (325.8 mg, 1.0 mmol), DMSO (5 mL), the reaction mixture was stirred at 100 °C for 14 h to afford product **2e** in 60% yield. <sup>1</sup>H NMR (400 MHz, D<sub>2</sub>O) δ 8.14 (d, *J* = 8.4 Hz, 2H), 7.91 (d, *J* = 8.4 Hz, 2H), 4.41 (q, *J* = 7.1 Hz, 2H), 1.40 (t, *J* = 7.1 Hz, 3H). <sup>13</sup>C NMR (100 MHz, D<sub>2</sub>O) δ 167.9, 146.6, 132.4, 130.0, 125.7, 62.6, 13.4. IR ν 1716, 1458, 1398, 1184, 1101, 630 cm<sup>-1</sup>. HRMS (ESI) for C<sub>9</sub>H<sub>9</sub>O<sub>5</sub>S: Calculated: 229.0176, [M-H]<sup>-</sup> found: 229.0170.

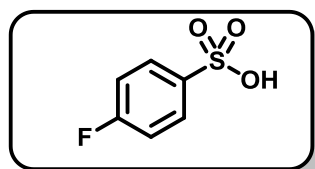

**(4-fluorobenzenesulfonic acid) 2f.** Prepared following general procedure using aryl iodide **1f** (111.0 mg, 0.5 mmol), thiourea dioxide (162.2 mg, 1.5 mmol), PdCl<sub>2</sub>(dppf) (9.2 mg, 0.0125 mmol), Cs<sub>2</sub>CO<sub>3</sub> (325.8 mg, 1.0 mmol), DMSO (5 mL), the reaction mixture was stirred at 100 °C for 14 h to afford product **2f** in 41% yield. <sup>1</sup>H NMR (400 MHz, D<sub>2</sub>O) δ 7.93 – 7.85 (m, 2H), 7.36 – 7.27 (m, 2H). <sup>13</sup>C NMR (100 MHz, D<sub>2</sub>O) δ 164.1 (*J* = 249.9 Hz), 138.6, 128.1 (*J* = 9.3 Hz), 115.9 (*J* = 22.6 Hz). <sup>19</sup>F NMR (376 MHz, D<sub>2</sub>O) δ -109.05. IR ν 1662,

1467, 1020, 829, 613  $\text{cm}^{-1}$ . **HRMS (ESI)** for  $\text{C}_6\text{H}_4\text{O}_3\text{FS}$ : Calculated: 174.9871,  $[\text{M}-\text{H}]^-$  found: 174.9861.

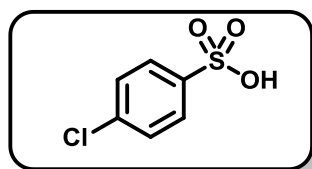

**(4-chlorobenzenesulfonic acid) 2g**. Prepared following general procedure using aryl iodine **1g** (119.2 mg, 0.5 mmol), thiourea dioxide (162.2 mg, 1.5 mmol),  $\text{PdCl}_2(\text{dppf})$  (9.2 mg, 0.0125 mmol),  $\text{Cs}_2\text{CO}_3$  (325.8 mg, 1.0 mmol), DMSO (5 mL), the reaction mixture was stirred at 100 °C for 14 h to afford product **2g** in 74% yield.  **$^1\text{H}$  NMR (400 MHz,  $\text{D}_2\text{O}$ )**  $\delta$  7.31 (d,  $J = 8.0$  Hz, 2H), 7.03 (d,  $J = 8.4$  Hz, 2H).  **$^{13}\text{C}$  NMR (100 MHz,  $\text{D}_2\text{O}$ )**  $\delta$  140.7, 136.7, 128.8, 126.8. **IR**  $\nu$  1724, 1479, 1089, 829, 760, 563  $\text{cm}^{-1}$ . **HRMS (ESI)** for  $\text{C}_6\text{H}_4\text{O}_3\text{ClS}$ : Calculated: 190.9575,  $[\text{M}-\text{H}]^-$  found: 190.9567.

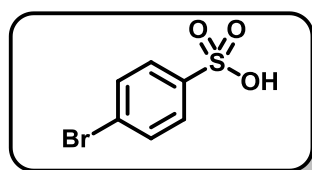

**(4-bromobenzenesulfonic acid) 2h**. Prepared following general procedure using aryl iodine **1h** (141.5 mg, 0.5 mmol), thiourea dioxide (162.2 mg, 1.5 mmol),  $\text{PdCl}_2(\text{dppf})$  (9.2 mg, 0.0125 mmol),  $\text{Cs}_2\text{CO}_3$  (325.8 mg, 1.0 mmol), DMSO (5 mL), the reaction mixture was stirred at 100 °C for 14 h to afford product **2h** in 75% yield.  **$^1\text{H}$  NMR (400 MHz,  $\text{D}_2\text{O}$ )**  $\delta$  7.56 – 7.51 (m, 2H), 7.51 – 7.46 (m, 2H).  **$^{13}\text{C}$  NMR (100 MHz,  $\text{D}_2\text{O}$ )**  $\delta$  141.4, 131.9, 127.1, 125.3. **IR**  $\nu$  1751, 1577, 1473, 1070, 821, 632  $\text{cm}^{-1}$ . **HRMS (ESI)** for  $\text{C}_6\text{H}_4\text{O}_3^{\text{81}}\text{BrS}$ : Calculated: 234.9050,  $[\text{M}-\text{H}]^-$  found: 234.9044.

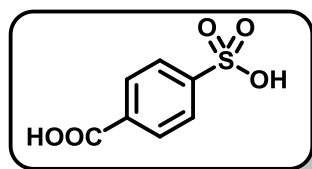

**(4-sulfobenzoic acid) 2i**. Prepared following general procedure using aryl iodine **1i** (124.0 mg, 0.5 mmol), thiourea dioxide (162.2 mg, 1.5 mmol),  $\text{PdCl}_2(\text{dppf})$  (9.2 mg, 0.0125 mmol),  $\text{Cs}_2\text{CO}_3$  (325.8 mg, 1.0 mmol), DMSO (5 mL), the reaction mixture was stirred at 100 °C for 14 h to afford product **2i** in 67% yield.  **$^1\text{H}$  NMR (400 MHz,  $\text{D}_2\text{O}$ )**  $\delta$  8.03 (d,  $J = 8.4$  Hz, 2H), 7.87 (d,  $J = 8.4$  Hz, 2H).  **$^{13}\text{C}$  NMR (100 MHz,  $\text{D}_2\text{O}$ )**  $\delta$  170.9, 145.9, 134.4, 130.0, 125.6. **IR**  $\nu$  1728, 1516, 1452, 1200, 835, 630  $\text{cm}^{-1}$ . **HRMS (ESI)** for  $\text{C}_7\text{H}_5\text{O}_5\text{S}$ : Calculated: 200.9863,

[M-H]<sup>-</sup> found: 200.9856.

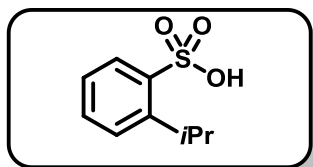

**(2-isopropylbenzenesulfonic acid) 2j.** Prepared following general procedure using aryl iodine **1j** (123.1 mg, 0.5 mmol), thiourea dioxide (162.2 mg, 1.5 mmol), PdCl<sub>2</sub>(dppf) (9.2 mg, 0.0125 mmol), Cs<sub>2</sub>CO<sub>3</sub> (325.8 mg, 1.0 mmol), DMSO (5 mL), the reaction mixture was stirred at 100 °C for 14 h to afford product **2j** in 66% yield. **<sup>1</sup>H NMR (400 MHz, D<sub>2</sub>O)** δ 7.91 (d, *J* = 8.0 Hz, 1H), 7.67 – 7.55(m, 2H), 7.39 – 7.32 (m, 1H), 3.95 – 3.82 (m, 1H), 1.30 (d, *J* = 6.8 Hz, 6H). **<sup>13</sup>C NMR (100 MHz, D<sub>2</sub>O)** δ 147.8, 139.7, 132.1, 127.7, 126.8, 125.8, 29.3, 23.4. **IR** ν 2960, 2870, 1176, 1082, 763, 613 cm<sup>-1</sup> **HRMS (ESI)** for C<sub>9</sub>H<sub>11</sub>O<sub>3</sub>S: Calculated: 199.0434, [M-H]<sup>-</sup> found: 199.0427.

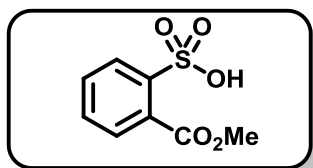

**(2-(methoxycarbonyl)benzenesulfonic acid) 2k.** Prepared following general procedure using aryl iodine **1k** (131.0 mg, 0.5 mmol), thiourea dioxide (162.2 mg, 1.5 mmol), PdCl<sub>2</sub>(dppf) (9.2 mg, 0.0125 mmol), Cs<sub>2</sub>CO<sub>3</sub> (325.8 mg, 1.0 mmol), DMSO (5 mL), the reaction mixture was stirred at 100 °C for 14 h to afford product **2k** in 62% yield. **<sup>1</sup>H NMR (400 MHz, D<sub>2</sub>O)** δ 8.03 – 7.98 (m, 1H), 7.76 – 7.68 (m, 2H), 7.68 – 7.63 (m, 1H), 4.01 (s, 3H). **<sup>13</sup>C NMR (100 MHz, D<sub>2</sub>O)** δ 171.4, 139.9, 131.6, 131.2, 130.6, 128.1, 127.4, 53.6. **IR** ν 1736, 1456, 1082, 754, 621 cm<sup>-1</sup>. **HRMS (ESI)** for C<sub>8</sub>H<sub>7</sub>O<sub>5</sub>S: Calculated: 215.0020, [M-H]<sup>-</sup> found: 215.0013.

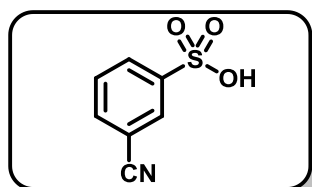

**(3-cyanobenzenesulfonic acid) 2l.** Prepared following general procedure using aryl iodine **1l** (114.5 mg, 0.5 mmol), thiourea dioxide (162.2 mg, 1.5 mmol), PdCl<sub>2</sub>(dppf) (9.2 mg, 0.0125 mmol), Cs<sub>2</sub>CO<sub>3</sub> (325.8 mg, 1.0 mmol), DMSO (5 mL), the reaction mixture was stirred at 100 °C for 14 h to afford product **2l** in 83% yield. **<sup>1</sup>H NMR (400 MHz, D<sub>2</sub>O)** δ 8.10 (t, *J* = 1.5 Hz, 1H), 8.02 – 7.98 (m, 1H), 7.86 – 7.81 (m, 1H), 7.61 (t, *J* = 7.9 Hz, 1H). **<sup>13</sup>C NMR (100**



**MHz, D<sub>2</sub>O**)  $\delta$  143.6, 135.1, 130.2, 130.0, 129.4, 118.6, 111.9. **IR**  $\nu$  2236, 1510, 1473, 847, 800, 619  $\text{cm}^{-1}$ . **HRMS (ESI)** for  $\text{C}_7\text{H}_4\text{O}_3\text{NS}$ : Calculated: 181.9917,  $[\text{M}-\text{H}]^-$  found: 181.9908.

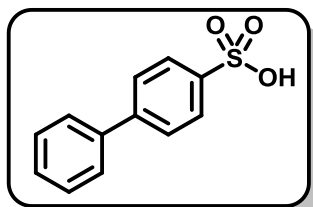

**(Biphenyl-4-sulfonic acid) 2m.** Prepared following general procedure using aryl iodine **1m** (140.1 mg, 0.5 mmol), thiourea dioxide (162.2 mg, 1.5 mmol),  $\text{PdCl}_2(\text{dppf})$  (9.2 mg, 0.0125 mmol),  $\text{Cs}_2\text{CO}_3$  (325.8 mg, 1.0 mmol), DMSO (5 mL), the reaction mixture was stirred at 100 °C for 14 h to afford product **2m** in 81% yield. **<sup>1</sup>H NMR (400 MHz, D<sub>2</sub>O)**  $\delta$  7.74 (d,  $J = 8.4$  Hz, 2H), 7.49 (d,  $J = 8.4$  Hz, 2H), 7.40 (d,  $J = 6.8$  Hz, 2H), 7.32 – 7.22 (m, 3H). **<sup>13</sup>C NMR (100 MHz, D<sub>2</sub>O)**  $\delta$  143.3, 141.2, 139.0, 129.0, 128.2, 127.2, 127.0, 126.0. **IR**  $\nu$  1724, 1658, 1456, 1184, 841, 760, 619  $\text{cm}^{-1}$ . **HRMS (ESI)** for  $\text{C}_{12}\text{H}_9\text{O}_3\text{S}$ : Calculated: 233.0278,  $[\text{M}-\text{H}]^-$  found: 233.0272.

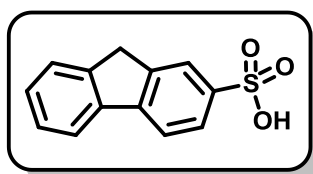

**(9H-fluorene-2-sulfonic acid) 2n.** Prepared following general procedure using aryl iodine **1n** (146.1 mg, 0.5 mmol), thiourea dioxide (162.2 mg, 1.5 mmol),  $\text{PdCl}_2(\text{dppf})$  (9.2 mg, 0.0125 mmol),  $\text{Cs}_2\text{CO}_3$  (325.8 mg, 1.0 mmol), DMSO (5 mL), the reaction mixture was stirred at 100 °C for 14 h to afford product **2n** in 72% yield. **<sup>1</sup>H NMR (400 MHz, D<sub>2</sub>O)**  $\delta$  7.85 (s, 1H), 7.72 (d,  $J = 8.0$  Hz, 1H), 7.69 – 7.62 (m, 2H), 7.50 – 7.45 (m, 1H), 7.33 (dd,  $J = 5.5, 2.9$  Hz, 2H), 3.66 (s, 2H). **<sup>13</sup>C NMR (101 MHz, D<sub>2</sub>O)**  $\delta$  144.3, 143.9, 143.8, 140.5, 139.7, 127.8, 126.9, 125.1, 124.2, 122.0, 120.5, 119.9, 36.3. **IR**  $\nu$  1452, 1223, 1184, 1090, 835, 731, 619  $\text{cm}^{-1}$ . **HRMS (ESI)** for  $\text{C}_{13}\text{H}_9\text{O}_3\text{S}$ : Calculated: 245.0278,  $[\text{M}-\text{H}]^-$  found: 245.0273.

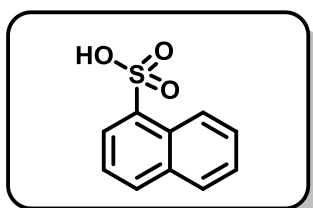

**(naphthalene-1-sulfonic acid) 2o.** Prepared following general procedure using aryl iodine **1o** (127.0 mg, 0.5 mmol), thiourea dioxide (162.2 mg, 1.5 mmol),

PdCl<sub>2</sub>(dppf) (9.2 mg, 0.0125 mmol), Cs<sub>2</sub>CO<sub>3</sub> (325.8 mg, 1.0 mmol), DMSO (5 mL), the reaction mixture was stirred at 100 °C for 14 h to afford product **2o** in 71% yield. **<sup>1</sup>H NMR (400 MHz, D<sub>2</sub>O)** δ 8.60 (d, *J* = 8.8 Hz, 1H), 8.09 (d, *J* = 7.2 Hz, 1H), 8.04 (d, *J* = 8.4 Hz, 1H), 7.97 (d, *J* = 8.0 Hz, 1H), 7.69 (t, *J* = 7.8 Hz, 1H), 7.60 (t, *J* = 7.4 Hz, 1H), 7.52 (t, *J* = 7.8 Hz, 1H). **<sup>13</sup>C NMR (100 MHz, D<sub>2</sub>O)** δ 137.7, 133.9, 132.7, 128.9, 127.9, 127.7, 126.7, 126.1, 124.9, 124.6. **IR** ν 1745, 1180, 1070, 800, 768, 746, 613 cm<sup>-1</sup>. **HRMS (ESI)** for C<sub>10</sub>H<sub>7</sub>O<sub>3</sub>S: Calculated: 207.0121, [M-H]<sup>-</sup> found: 207.0113.

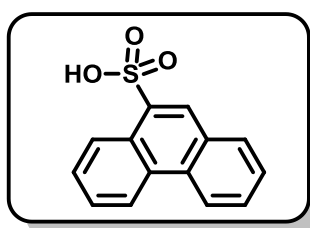

**(phenanthrene-9-sulfonic acid) 2p.** Prepared following general procedure using aryl iodine **1p** (152.1 mg, 0.5 mmol), thiourea dioxide (162.2 mg, 1.5 mmol), PdCl<sub>2</sub>(dppf) (9.2 mg, 0.0125 mmol), Cs<sub>2</sub>CO<sub>3</sub> (325.8 mg, 1.0 mmol), DMSO (5 mL), the reaction mixture was stirred at 100 °C for 14 h to afford product **2p** in 64% yield. **<sup>1</sup>H NMR (400 MHz, D<sub>2</sub>O)** δ 8.60 (d, *J* = 8.6 Hz, 1H), 8.09 (d, *J* = 7.3 Hz, 1H), 8.04 (d, *J* = 8.3 Hz, 1H), 7.97 (d, *J* = 8.2 Hz, 1H), 7.69 (t, *J* = 7.7 Hz, 2H), 7.60 (t, *J* = 7.5 Hz, 1H), 7.52 (t, *J* = 7.8 Hz, 2H). **<sup>13</sup>C NMR (100 MHz, D<sub>2</sub>O)** δ 136.2, 130.6, 130.4, 129.5, 128.9, 128.5, 127.8, 127.1, 127.0, 127.0, 126.0, 125.8, 122.9, 121.9. **IR** ν 1726, 1163, 1043, 754, 734, 648 cm<sup>-1</sup>. **HRMS (ESI)** for C<sub>14</sub>H<sub>9</sub>O<sub>3</sub>S: Calculated: 257.0278, [M-H]<sup>-</sup> found: 257.0274.

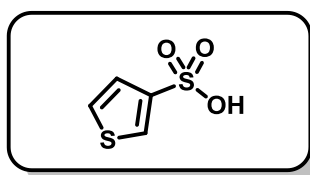

**(thiophene-3-sulfonic acid) 2q.** Prepared following general procedure using aryl iodine **1q** (105.0 mg, 0.5 mmol), thiourea dioxide (162.2 mg, 1.5 mmol), PdCl<sub>2</sub>(dppf) (9.2 mg, 0.0125 mmol), Cs<sub>2</sub>CO<sub>3</sub> (325.8 mg, 1.0 mmol), DMSO (5 mL), the reaction mixture was stirred at 100 °C for 14 h to afford product **2q** in 77% yield. **<sup>1</sup>H NMR (400 MHz, D<sub>2</sub>O)** δ 7.96 (dd, *J* = 3.2, 1.6 Hz, 1H), 7.60 (dd, *J* = 5.2, 3.2 Hz, 1H), 7.40 (dd, *J* = 5.2, 1.6 Hz, 1H). **<sup>13</sup>C NMR (100 MHz, D<sub>2</sub>O)** δ 142.3, 128.4, 127.4, 124.9. **IR** ν 1508, 1178, 1082, 1020, 611 cm<sup>-1</sup>. **HRMS (ESI)** for C<sub>4</sub>H<sub>3</sub>O<sub>3</sub>S<sub>2</sub>: Calculated: 162.9529, [M-H]<sup>-</sup> found: 162.9519.

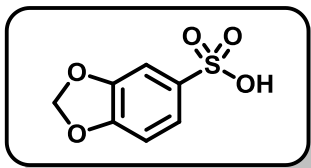

**(benzo[d][1,3]dioxole-5-sulfonic acid) 2r.** Prepared following general procedure using aryl iodine **1r** (124.0 mg, 0.5 mmol), thiourea dioxide (162.2 mg, 1.5 mmol), PdCl<sub>2</sub>(dppf) (9.2 mg, 0.0125 mmol), Cs<sub>2</sub>CO<sub>3</sub> (325.8 mg, 1.0 mmol), DMSO (5 mL), the reaction mixture was stirred at 100 °C for 14 h to afford product **2r** in 82% yield. **<sup>1</sup>H NMR (400 MHz, D<sub>2</sub>O)** δ 7.35 (dd, *J* = 8.0, 1.6 Hz, 1H), 7.25 (d, *J* = 2.0 Hz, 1H), 6.94 (d, *J* = 8.4 Hz, 1H), 6.05 (s, 2H). **<sup>13</sup>C NMR (100 MHz, D<sub>2</sub>O)** δ 149.7, 147.5, 136.1, 120.4, 108.2, 106.0, 102.1. **IR** ν 2831, 1163, 1118, 1072, 808, 708, 629 cm<sup>-1</sup>. **HRMS (ESI)** for C<sub>7</sub>H<sub>5</sub>O<sub>5</sub>S: Calculated: 200.9863, [M-H]<sup>-</sup> found: 200.9856.

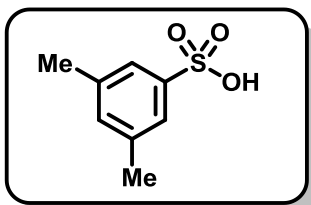

**(3,5-dimethylbenzenesulfonic acid) 2s.** Prepared following general procedure using aryl iodine **1s** (116.0 mg, 0.5 mmol), thiourea dioxide (162.2 mg, 1.5 mmol), PdCl<sub>2</sub>(dppf) (9.2 mg, 0.0125 mmol), Cs<sub>2</sub>CO<sub>3</sub> (325.8 mg, 1.0 mmol), DMSO (5 mL), the reaction mixture was stirred at 100 °C for 14 h to afford product **2s** in 65% yield. **<sup>1</sup>H NMR (400 MHz, D<sub>2</sub>O)** δ 7.40 (s, 2H), 7.22 (s, 1H), 2.32 (s, 6H). **<sup>13</sup>C NMR (100 MHz, D<sub>2</sub>O)** δ 142.1, 139.3, 132.8, 122.7, 20.3. **IR** ν 1452, 1205, 1086, 1020, 706 cm<sup>-1</sup>. **HRMS (ESI)** for C<sub>8</sub>H<sub>9</sub>O<sub>3</sub>S: Calculated: 185.0278, [M-H]<sup>-</sup> found: 185.0269.

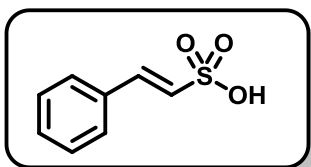

**((E)-2-phenylethene-1-sulfonic acid) 2t.** Prepared following general procedure using beta-bromostyrene **1t** (91.5 mg, 0.5 mmol), thiourea dioxide (162.2 mg, 1.5 mmol), PdCl<sub>2</sub>(dppf) (9.2 mg, 0.0125 mmol), Cs<sub>2</sub>CO<sub>3</sub> (325.8 mg, 1.0 mmol), DMSO (5 mL), the reaction mixture was stirred at 100 °C for 14 h to afford product **2t** in 57% yield. **<sup>1</sup>H NMR (400 MHz, D<sub>2</sub>O)** δ 7.60 (dt, *J* = 5.6, 3.5 Hz, 2H), 7.51 – 7.45 (m, 3H), 7.35 (d, *J* = 15.7 Hz, 1H), 7.03 (d, *J* = 15.7 Hz, 1H). **<sup>13</sup>C NMR (100 MHz, D<sub>2</sub>O)** δ 136.9, 133.5, 130.2, 129.1, 127.9, 127.7. **IR** ν 1744, 1579, 1186, 1035, 746 cm<sup>-1</sup>. **HRMS (ESI)** for C<sub>8</sub>H<sub>7</sub>O<sub>3</sub>S: Calculated: 183.0121,

[M-H]<sup>-</sup> found: 183.0113.

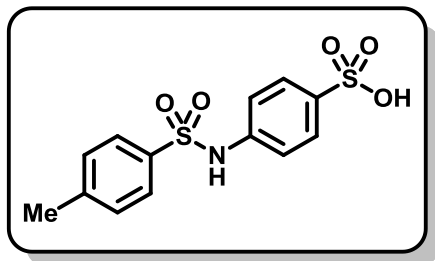

**(4-((4-methylphenyl)sulfonamido)benzenesulfonic acid) 2u.** Prepared following general procedure using aryl iodine **1u** (186.6 mg, 0.5 mmol), thiourea dioxide (162.2 mg, 1.5 mmol), PdCl<sub>2</sub>(dppf) (9.2 mg, 0.0125 mmol), Cs<sub>2</sub>CO<sub>3</sub>

(325.8 mg, 1.0 mmol), DMSO (5 mL), the reaction mixture was stirred at 100 °C for 14 h to afford product **2u** in 83% yield. **<sup>1</sup>H NMR (400 MHz, D<sub>2</sub>O)** δ 7.65 – 7.60 (m, 2H), 7.55 (d, *J* = 8.4 Hz, 2H), 7.15 – 7.10 (m, 2H), 7.06 (d, *J* = 8.1 Hz, 2H), 2.10 (s, 3H). **<sup>13</sup>C NMR (100 MHz, D<sub>2</sub>O)** δ 145.3, 139.3, 138.8, 134.1, 129.9, 126.9, 126.9, 120.2, 20.6. **IR** ν 1329, 1157, 1090, 839, 914, 613 cm<sup>-1</sup>. **HRMS (ESI)** for C<sub>13</sub>H<sub>12</sub>O<sub>5</sub>NS<sub>2</sub>: Calculated: 326.0162, [M-H]<sup>-</sup> found: 326.0160.

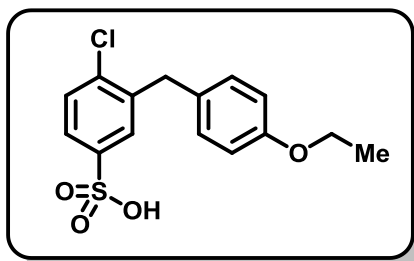

**(4-chloro-3-(4-ethoxybenzyl)benzenesulfonic acid) 2v.** Prepared following general procedure using aryl iodine **1v** (186.3 mg, 0.5 mmol), thiourea dioxide (162.2 mg, 1.5 mmol), PdCl<sub>2</sub>(dppf) (9.2 mg, 0.0125 mmol), Cs<sub>2</sub>CO<sub>3</sub>

(325.8 mg, 1.0 mmol), DMSO (5 mL), the reaction mixture was stirred at 100 °C for 14 h to afford product **2v** in 52% yield. **<sup>1</sup>H NMR (400 MHz, D<sub>2</sub>O)** δ 7.52 (s, 1H), 7.40 (d, *J* = 7.9 Hz, 1H), 7.00 (d, *J* = 8.2 Hz, 1H), 6.75 (d, *J* = 8.3 Hz, 2H), 6.43 (d, *J* = 8.4 Hz, 2H), 3.60 (s, 2H), 3.47 (q, *J* = 6.8 Hz, 2H), 0.97 (t, *J* = 6.9 Hz, 3H). **<sup>13</sup>C NMR (100 MHz, D<sub>2</sub>O)** δ 156.6, 141.6, 139.6, 136.6, 131.0, 129.8, 129.7, 127.9, 124.9, 114.4, 63.6, 37.9, 14.1. **IR** ν 1510, 1232, 1163, 1026, 736, 648 cm<sup>-1</sup>. **HRMS (ESI)** for C<sub>15</sub>H<sub>14</sub>O<sub>4</sub>ClS: Calculated: 325.0307, [M-H]<sup>-</sup> found: 325.0303.

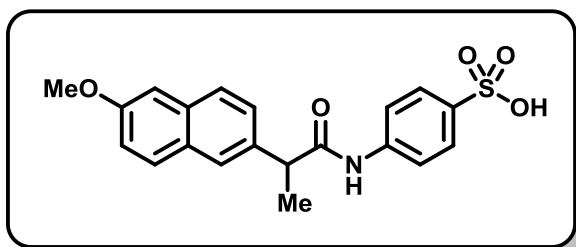

**(4-(2-(6-methoxynaphthalen-2-yl)propanamido)benzenesulfonic acid) 2w.**

Prepared following general procedure using aryl iodide **1w** (215.6 mg, 0.5 mmol), thiourea dioxide (162.2 mg, 1.5 mmol), PdCl<sub>2</sub>(dppf) (9.2 mg, 0.0125 mmol), Cs<sub>2</sub>CO<sub>3</sub> (325.8 mg, 1.0 mmol), DMSO (5 mL), the reaction mixture was stirred at 100 °C for 14 h to afford product **2w** in 56% yield. <sup>1</sup>H NMR (400 MHz, D<sub>2</sub>O) δ 7.54 (d, *J* = 7.6 Hz, 2H), 7.33 – 7.16 (m, 3H), 7.03-7.01 (m, 3H), 6.51 (d, *J* = 7.9 Hz, 1H), 6.34 (s, 1H), 3.51 (d, *J* = 5.7 Hz, 1H), 3.10 (s, 3H), 1.15 (d, *J* = 5.6 Hz, 3H). <sup>13</sup>C NMR (100 MHz, D<sub>2</sub>O) δ 174.9, 156.7, 139.8, 138.5, 135.7, 133.2, 128.9, 128.4, 127.0, 126.3, 125.5, 120.2, 118.2, 105.4, 54.5, 46.5, 17.7. IR ν 1508, 1233, 1163, 1091, 1031, 835 cm<sup>-1</sup>. HRMS (ESI) for C<sub>20</sub>H<sub>18</sub>O<sub>5</sub>NS: Calculated: 384.0911, [M-H]<sup>-</sup> found: 384.0907.

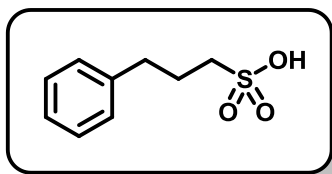

**(3-phenylpropane-1-sulfonic acid) 3a.** Prepared following general procedure using alkyl bromide **2a'** (99.50 mg, 0.5 mmol), thiourea dioxide (99.6 mg, 1.5 mmol), KI (166.00 mg, 1.0 mmol), Cs<sub>2</sub>CO<sub>3</sub> (325.8 mg,

1.0 mmol), DMSO (5 mL), the reaction mixture was stirred at 100 °C for 14 h to afford product **3a** in 57% yield. <sup>1</sup>H NMR (400 MHz, D<sub>2</sub>O) δ 7.29 (t, *J* = 7.4 Hz, 2H), 7.22-7.18 (m, 3H), 2.83 (dd, *J* = 9.0, 6.7 Hz, 2H), 2.67 (dd, *J* = 14.1, 6.5 Hz, 2H), 2.03 – 1.93 (m, 2H). <sup>13</sup>C NMR (100 MHz, D<sub>2</sub>O) δ 141.5, 128.6, 128.5, 126.2, 50.4, 33.6, 25.8. IR ν 2830, 1452, 1169, 1032, 750, 629 cm<sup>-1</sup>. HRMS (ESI) for C<sub>9</sub>H<sub>11</sub>O<sub>3</sub>S: Calculated: 199.0434, [M-H]<sup>-</sup> found: 199.0426.

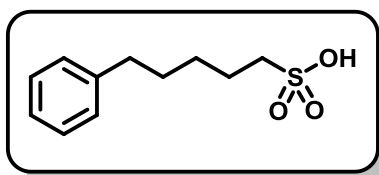

**(5-phenylpentane-1-sulfonic acid) 3b.** Prepared following general procedure using alkyl bromide **2b'** (113.6 mg, 0.5 mmol), thiourea dioxide (162.2 mg, 1.5 mmol), KI (166.00 mg, 1.0 mmol), Cs<sub>2</sub>CO<sub>3</sub>

(325.8 mg, 1.0 mmol), DMSO (5 mL), the reaction mixture was stirred at 100 °C for

14 h to afford product **3b** in 43% yield.  $^1\text{H NMR}$  (400 MHz,  $\text{D}_2\text{O}$ )  $\delta$  7.15 (t,  $J = 7.1$  Hz, 2H), 7.07-7.02 (m, 3H), 2.80 – 2.72 (m, 2H), 2.44 (t,  $J = 7.1$  Hz, 2H), 1.72 – 1.60 (m, 2H), 1.51 – 1.39 (m, 2H), 1.29 – 1.19 (m, 2H).  $^{13}\text{C NMR}$  (100 MHz,  $\text{D}_2\text{O}$ )  $\delta$  142.7, 128.4, 128.3, 125.6, 51.1, 35.1, 30.5, 27.6, 24.0. **IR**  $\nu$  1594, 1454, 1167, 1016, 765, 613  $\text{cm}^{-1}$ . **HRMS** (ESI) for  $\text{C}_{11}\text{H}_{15}\text{O}_3\text{S}$  : Calculated: 227.0747,  $[\text{M-H}]^-$  found: 227.0742.

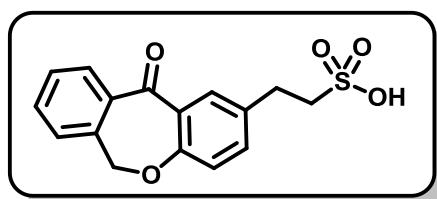

(2-(11-oxo-6,11-dihydrodibenzo[b,e]oxepin-2-yl)ethane-1-sulfonic acid) **3c**. Prepared following general procedure using alkyl bromide **2c'** (158.6 mg, 0.5 mmol), thiourea dioxide (162.2 mg, 1.5 mmol), KI (166.00 mg, 1.0 mmol),  $\text{Cs}_2\text{CO}_3$  (325.8 mg, 1.0 mmol), DMSO (5 mL), the reaction mixture was stirred at 100  $^\circ\text{C}$  for 14 h to afford product **3c** in 53% yield.  $^1\text{H NMR}$  (400 MHz,  $\text{D}_2\text{O}$ )  $\delta$  7.73 (d,  $J = 2.3$  Hz, 1H), 7.64 (dd,  $J = 7.7, 1.0$  Hz, 1H), 7.59 (td,  $J = 7.2, 1.2$  Hz, 1H), 7.46 (td,  $J = 7.6, 0.8$  Hz, 1H), 7.32 (dd,  $J = 13.0, 4.7$  Hz, 2H), 6.80 (t,  $J = 6.7$  Hz, 1H), 4.97 (s, 2H), 3.12 – 3.04 (m, 2H), 2.99 – 2.90 (m, 2H).  $^{13}\text{C NMR}$  (100 MHz,  $\text{D}_2\text{O}$ )  $\delta$  193.7, 159.6, 139.2, 136.6, 135.6, 133.7, 133.2, 130.4, 129.3, 128.8, 128.1, 124.3, 120.8, 73.1, 52.0, 29.4. **IR**  $\nu$  1489, 1163, 1035, 758, 835, 609  $\text{cm}^{-1}$ . **HRMS** (ESI) for  $\text{C}_{16}\text{H}_{13}\text{O}_5\text{S}$ : Calculated: 317.0489,  $[\text{M-H}]^-$  found: 317.0486.

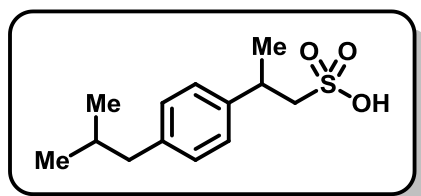

(2-(4-isobutylphenyl)propane-1-sulfonic acid) **3d**. Prepared following general procedure using alkyl bromide **2d'** (127.6 mg, 0.5 mmol), thiourea dioxide (162.2 mg, 1.5 mmol), KI (166.00 mg, 1.0 mmol),  $\text{Cs}_2\text{CO}_3$  (325.8 mg, 1.0 mmol), DMSO (5 mL), the reaction mixture was stirred at 100  $^\circ\text{C}$  for 14 h to afford product **3d** in 61% yield.  $^1\text{H NMR}$  (400 MHz,  $\text{D}_2\text{O}$ )  $\delta$  7.19 (d,  $J = 8.1$  Hz, 2H), 7.11 (d,  $J = 8.0$  Hz, 2H), 3.32 – 3.21 (m, 1H), 3.21 – 3.07 (m, 2H), 2.40 (d,  $J = 7.1$  Hz, 2H), 1.84 – 1.71 (m,  $J = 13.3, 6.6$  Hz, 1H), 1.36 (d,

$J = 6.8$  Hz, 3H), 0.84 (d,  $J = 6.6$  Hz, 6H).  $^{13}\text{C}$  NMR (100 MHz,  $\text{D}_2\text{O}$ )  $\delta$  143.4, 140.1, 129.4, 126.7, 58.3, 44.4, 35.8, 29.7, 21.8, 21.4. IR  $\nu$  2960, 2913, 1151, 1020, 847, 629  $\text{cm}^{-1}$ . HRMS (ESI) for  $\text{C}_{13}\text{H}_{19}\text{O}_3\text{S}$ : Calculated: 255.1060,  $[\text{M}-\text{H}]^-$  found: 255.1059.

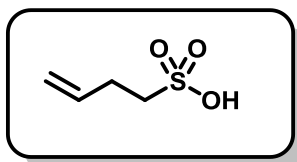

**(3-Butene-1-sulfonic acid) 5.** Prepared following general procedure using alkyl bromide **4** (67.5 mg, 0.5 mmol), thiourea dioxide (162.2 mg, 1.5 mmol), KI (166.00 mg, 1.0 mmol),  $\text{Cs}_2\text{CO}_3$  (325.8 mg, 1.0 mmol), DMSO (5 mL), the reaction mixture was stirred at 100 °C for 14 h to afford product **5** in 10% yield.  $^1\text{H}$  NMR (400 MHz,  $\text{D}_2\text{O}$ )  $\delta$  6.30 – 6.14 (m, 1H), 5.51 – 5.34 (m, 2H), 3.34 – 3.22 (m, 2H), 2.81 – 2.70 (m, 2H).  $^{13}\text{C}$  NMR (100 MHz,  $\text{D}_2\text{O}$ )  $\delta$  136.4, 116.5, 50.6, 28.7. IR  $\nu$  1653, 1204, 1174, 1045, 594  $\text{cm}^{-1}$ . HRMS (ESI) for  $\text{C}_4\text{H}_7\text{O}_3\text{S}$ : Calculated: 135.0121,  $[\text{M}-\text{H}]^-$  found: 135.0111.

## VII. X-Ray crystal structure

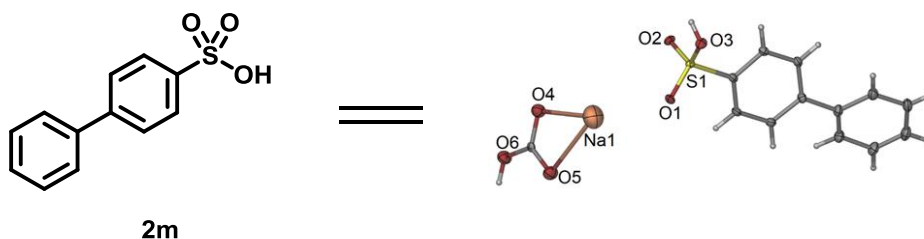

|                                 |                                     |
|---------------------------------|-------------------------------------|
| Bond precision:                 | O-C 0.0030                          |
| Cell:                           | Wavelength = 1.54184                |
|                                 | a = 16.2484(1) $\alpha = 90$        |
|                                 | b = 11.3597(1) $\beta = 100.148(1)$ |
|                                 | c = 8.2456(1) $\gamma = 90$         |
| Temperature:                    | 100 K                               |
| Volume:                         | 1498.14(2)                          |
| Space group:                    | P 1 21/c 1                          |
| Sum formula                     | C13 H11 Na O6 S                     |
| Mr                              | 318.27                              |
| Dx, g cm <sup>-3</sup>          | 1.411                               |
| Z                               | 4                                   |
| Mu (mm <sup>-1</sup> )          | 2.432                               |
| F000                            | 656.0                               |
| h,k,lmax                        | 19,13,9                             |
| Nref                            | 2563                                |
| Tmin, Tmax                      | 0.382, 1.000                        |
| Correction method= # Reported T | Tmin = 0.382 Tmax = 1.000           |
| Limits                          |                                     |
| AbsCorr = MULTI-SCAN            |                                     |
| Data completeness               | 0.960                               |
| Theta(max)                      | 67.074                              |
| R(reflections)                  | 0.0725(2515)                        |
| wR2(reflections)                | 0.1609(2563)                        |
| S                               | 1.166                               |
| Npar                            | 302                                 |



## References:

1. Y. Nosaka and A. Y. Nosaka, *Chem. Rev.* 2017, **117**, 11302.
2. R. D. Mair and A. J. Graupner. *Anal. Chem.* 1964, **36**, 194.
3. Y. Li, S. A. Rizvi, D. Hu, D. Sun, A. Gao, Y. Zhou, J. Li and X. Jiang. *Angew. Chem., Int. Ed.*, 2019, **58**, 13499.

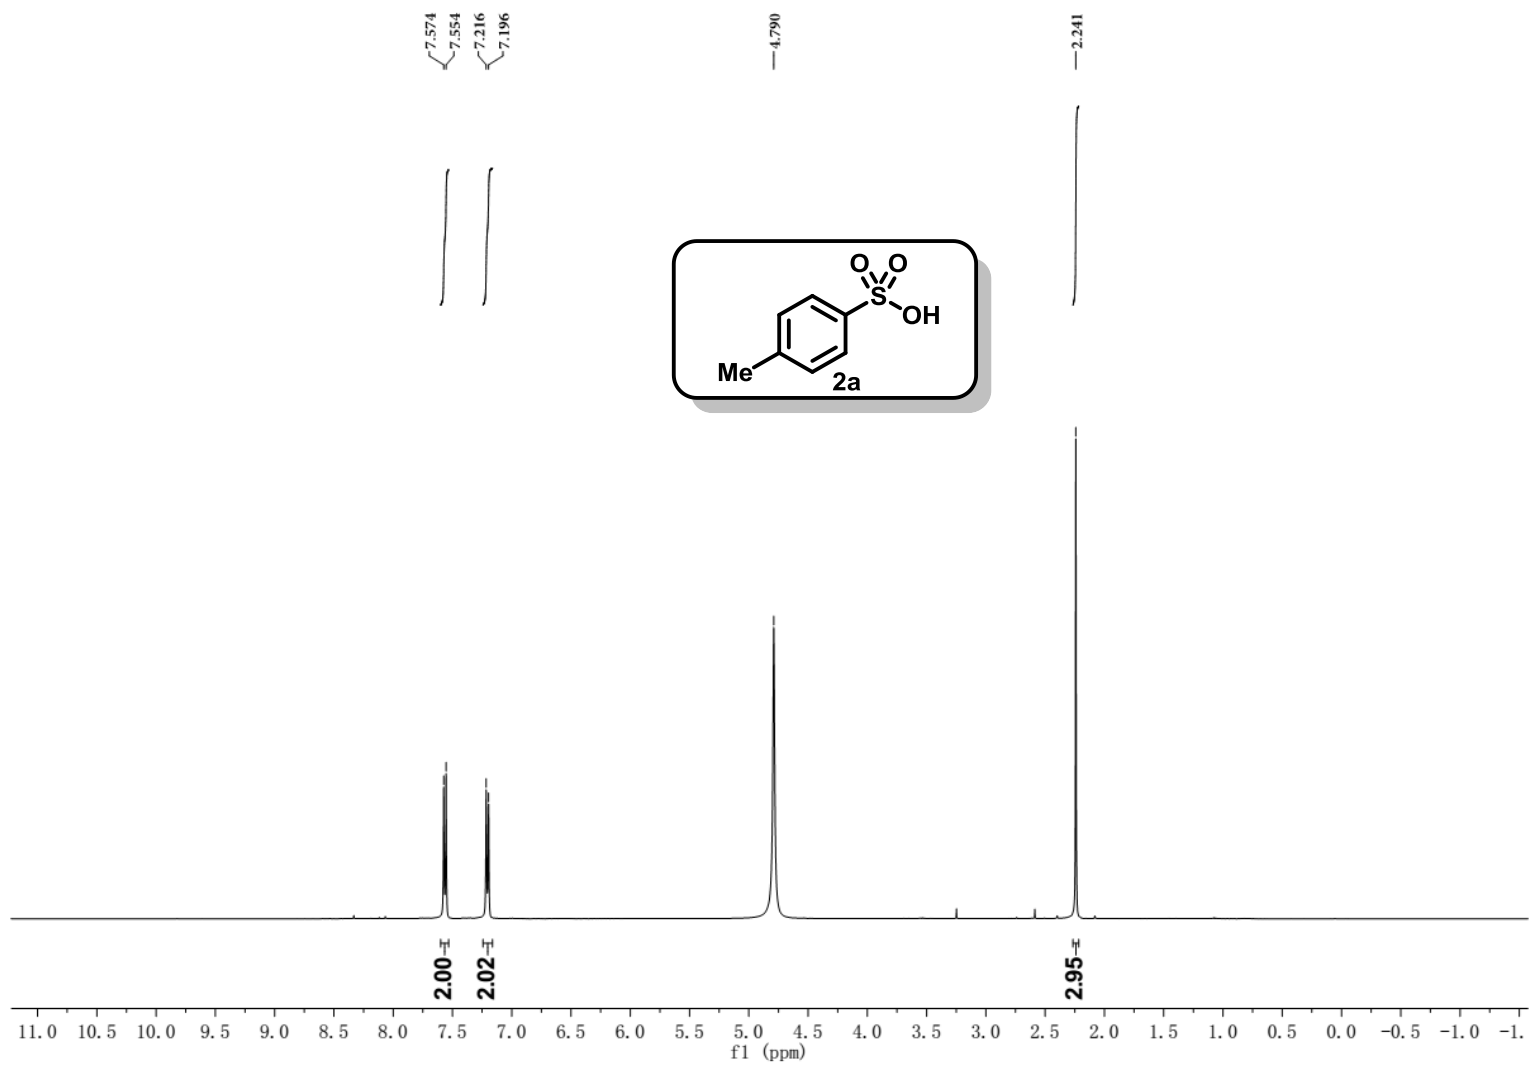

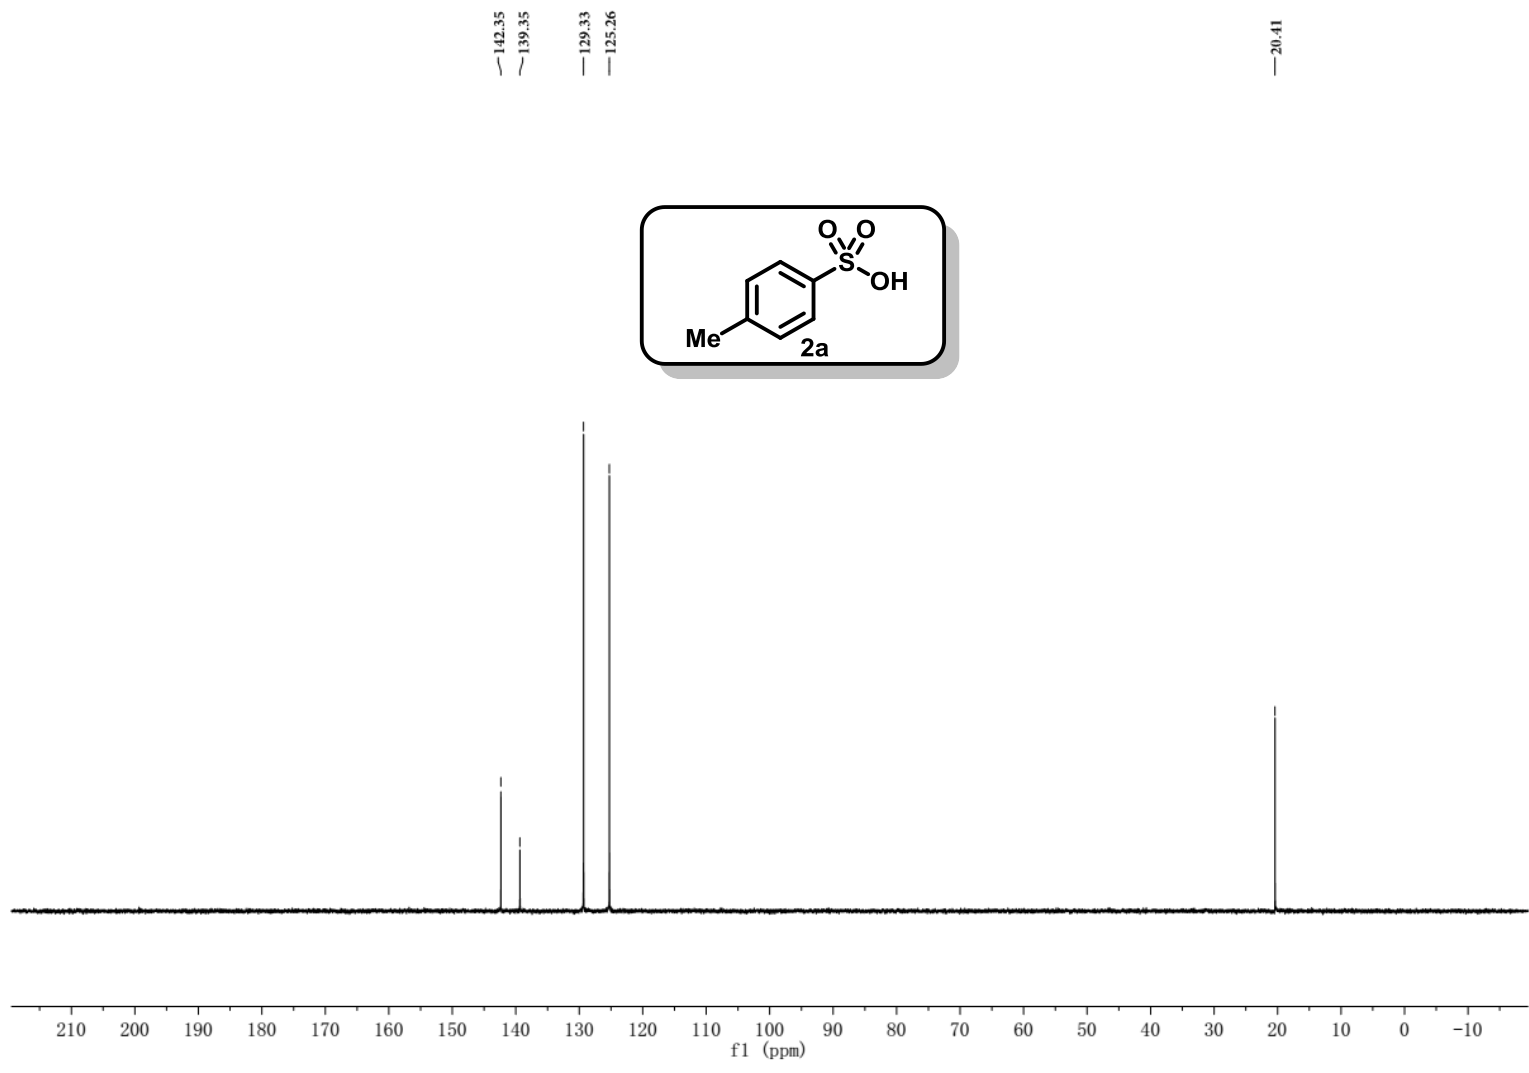

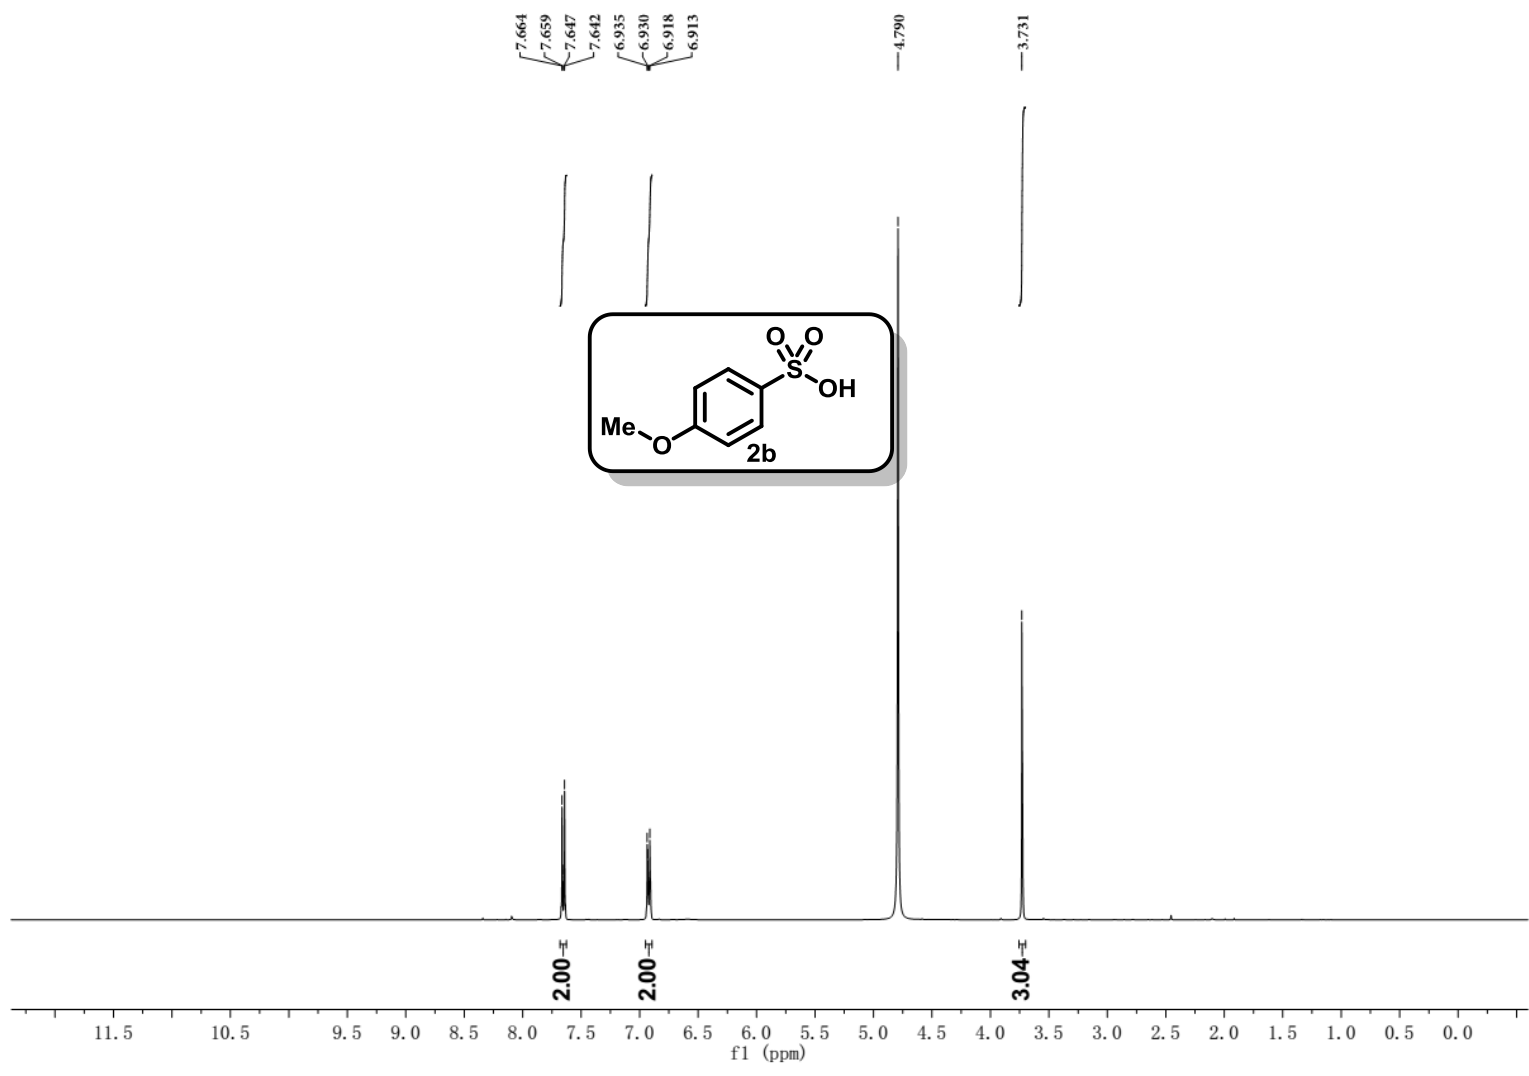

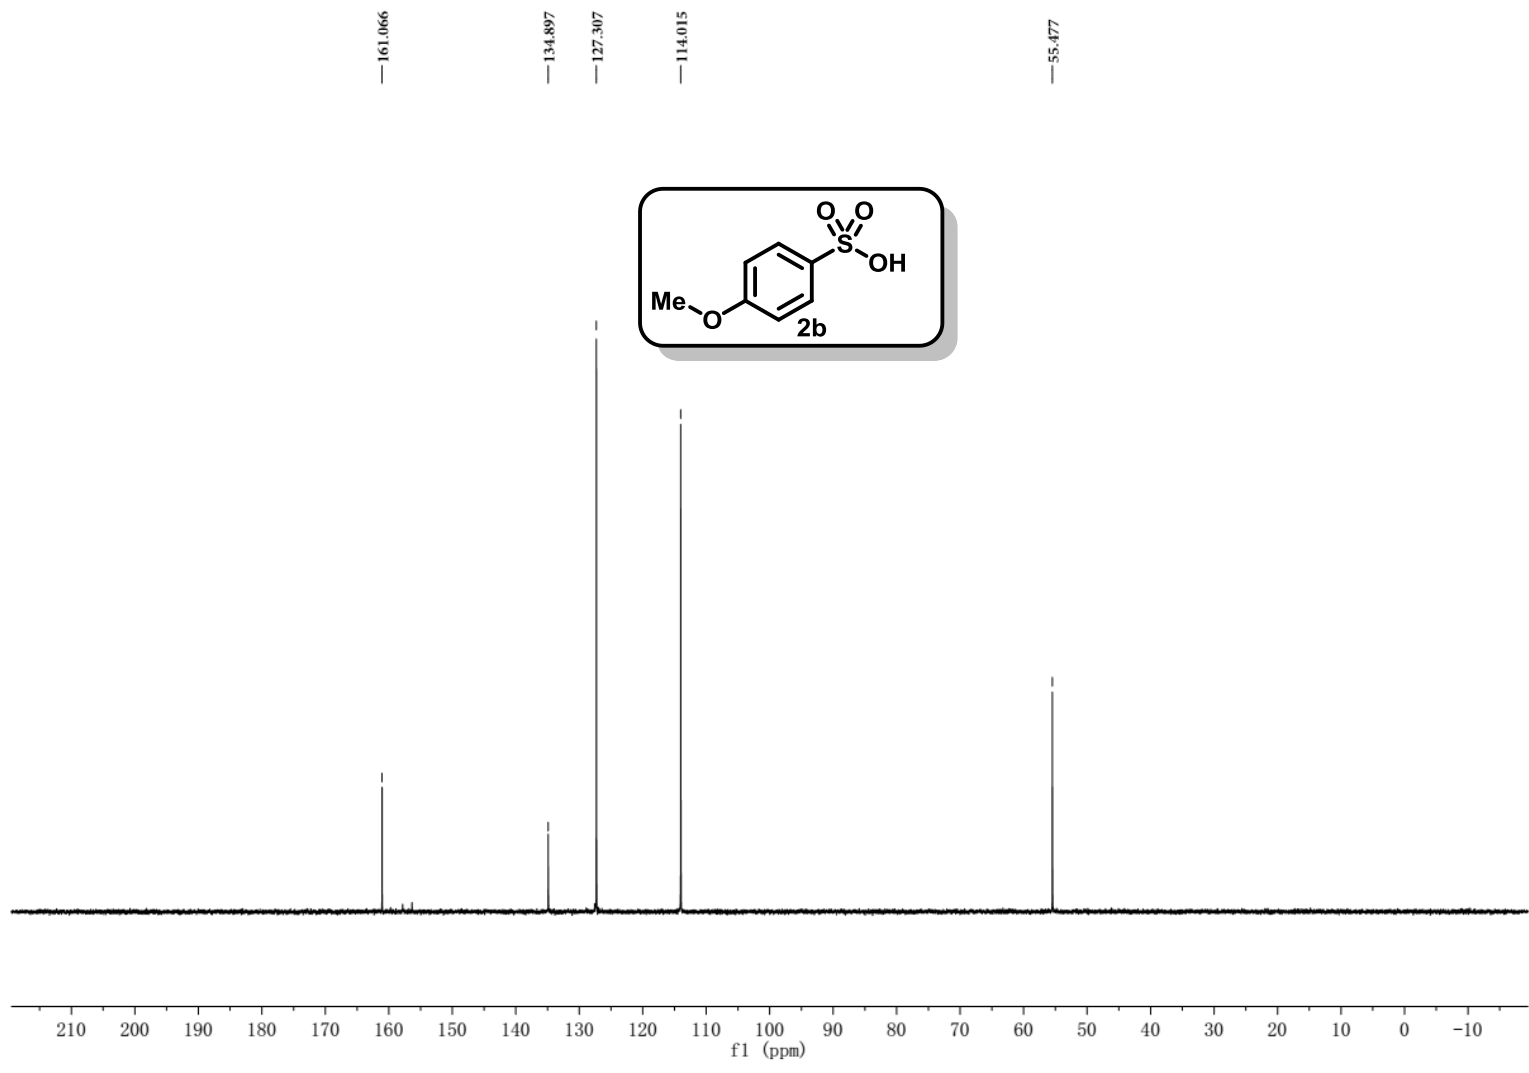

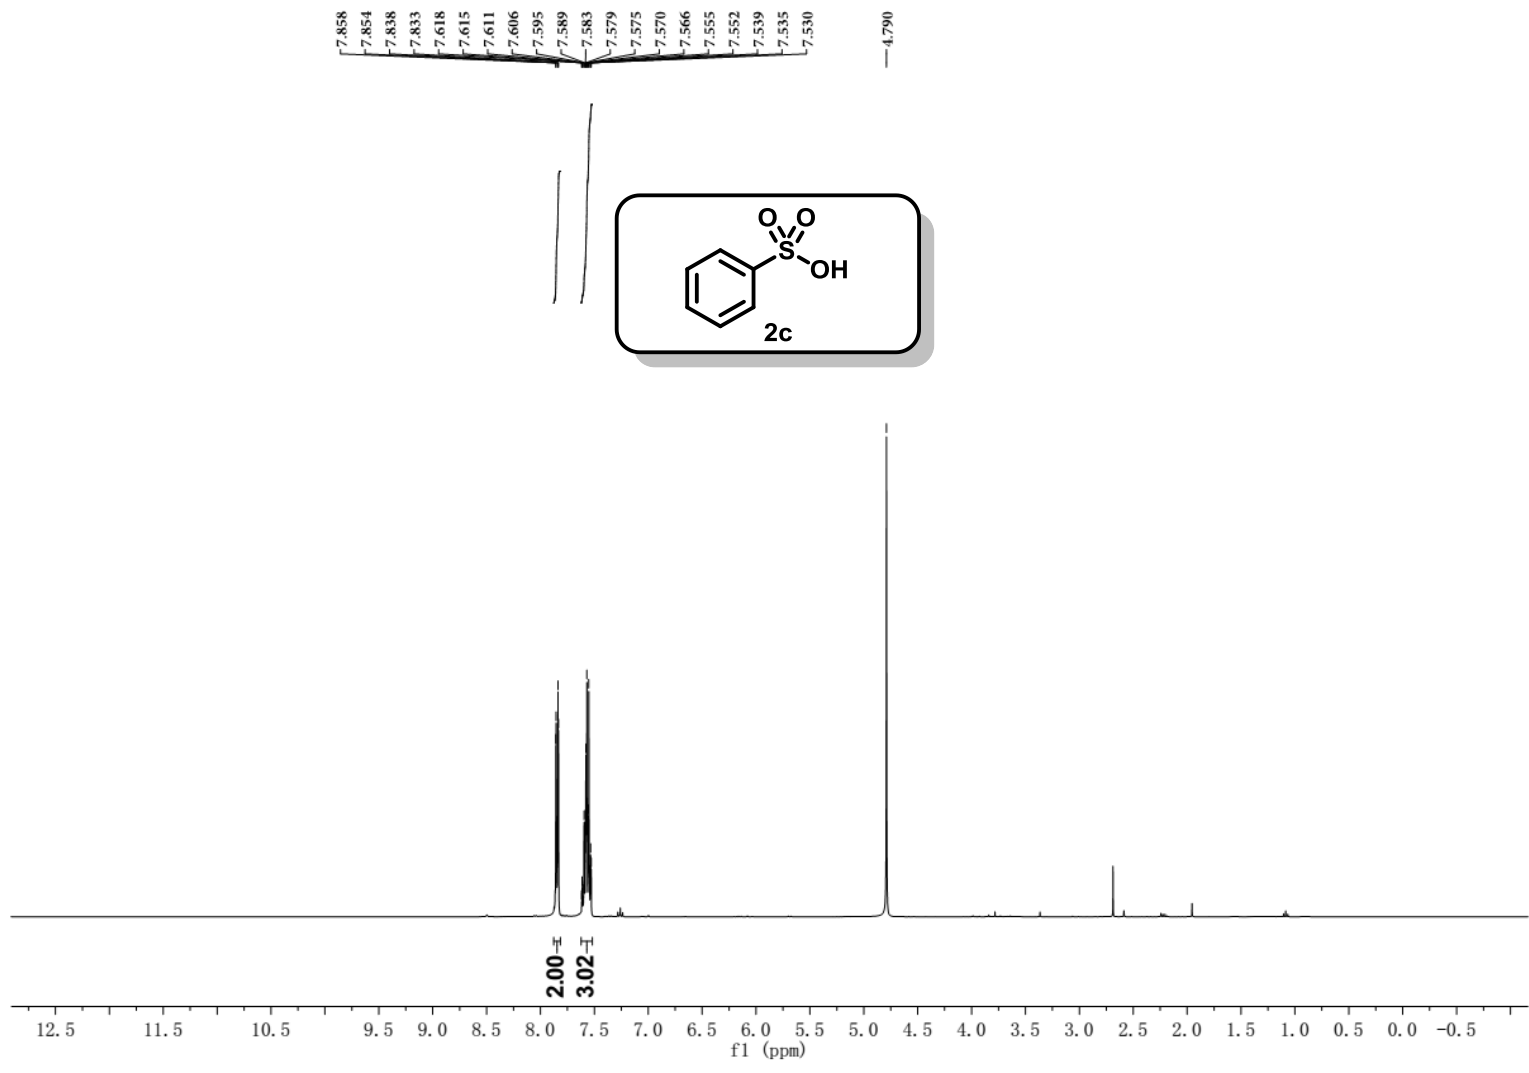

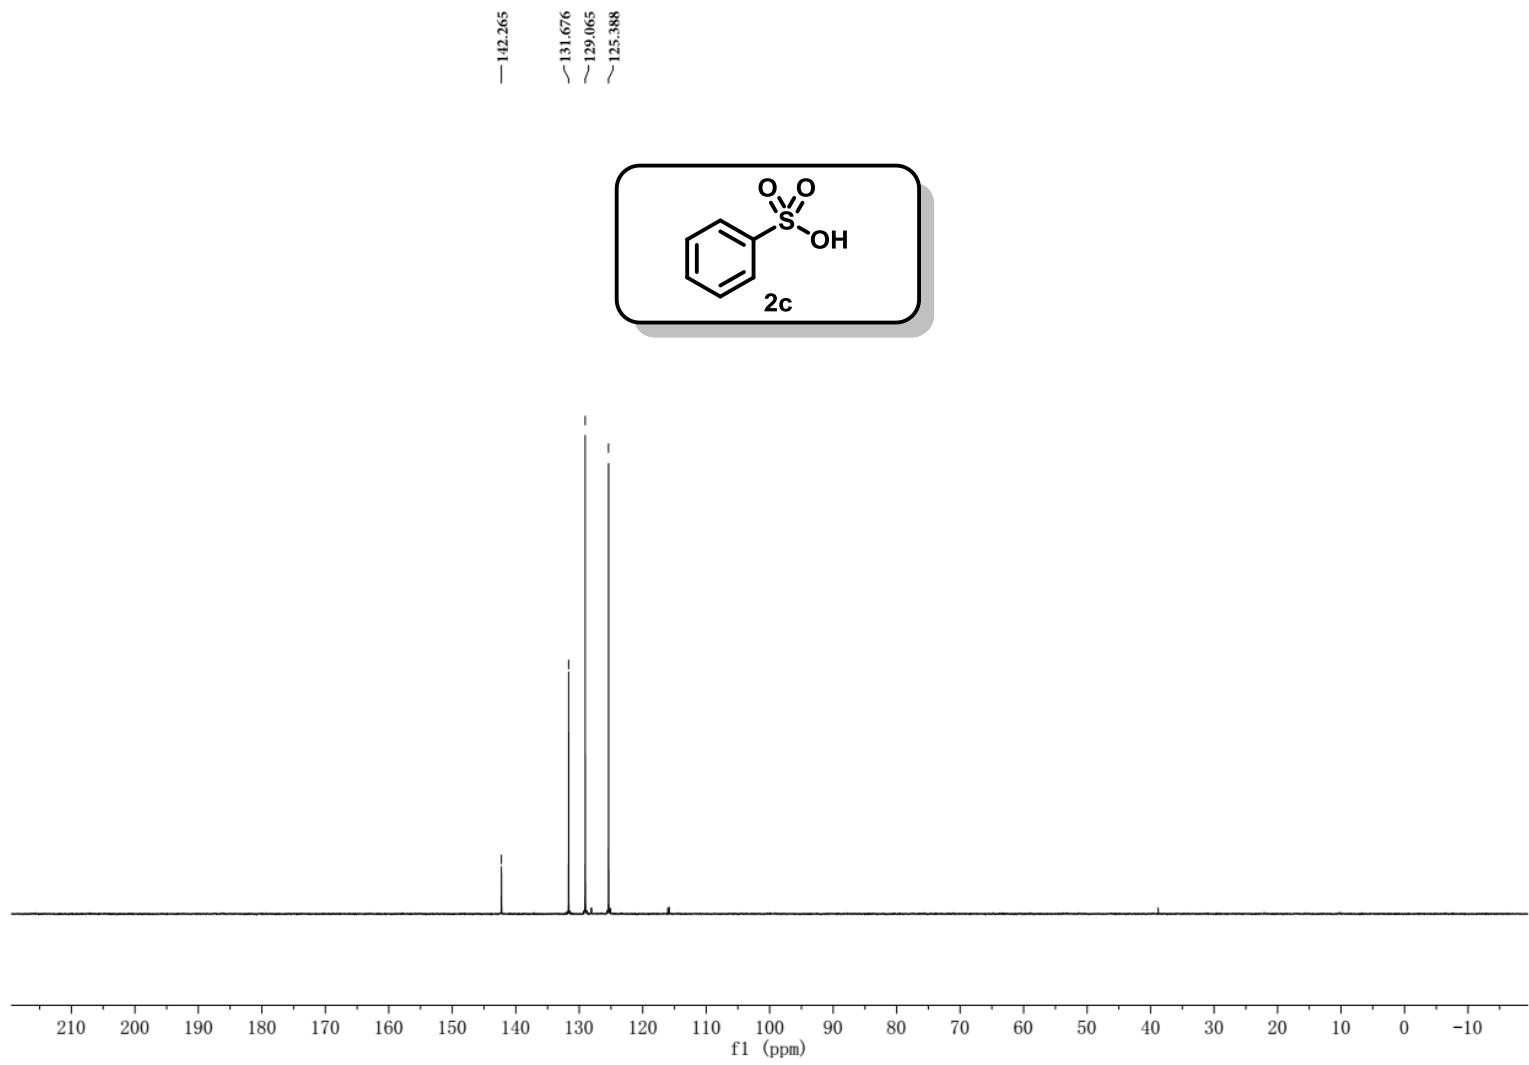

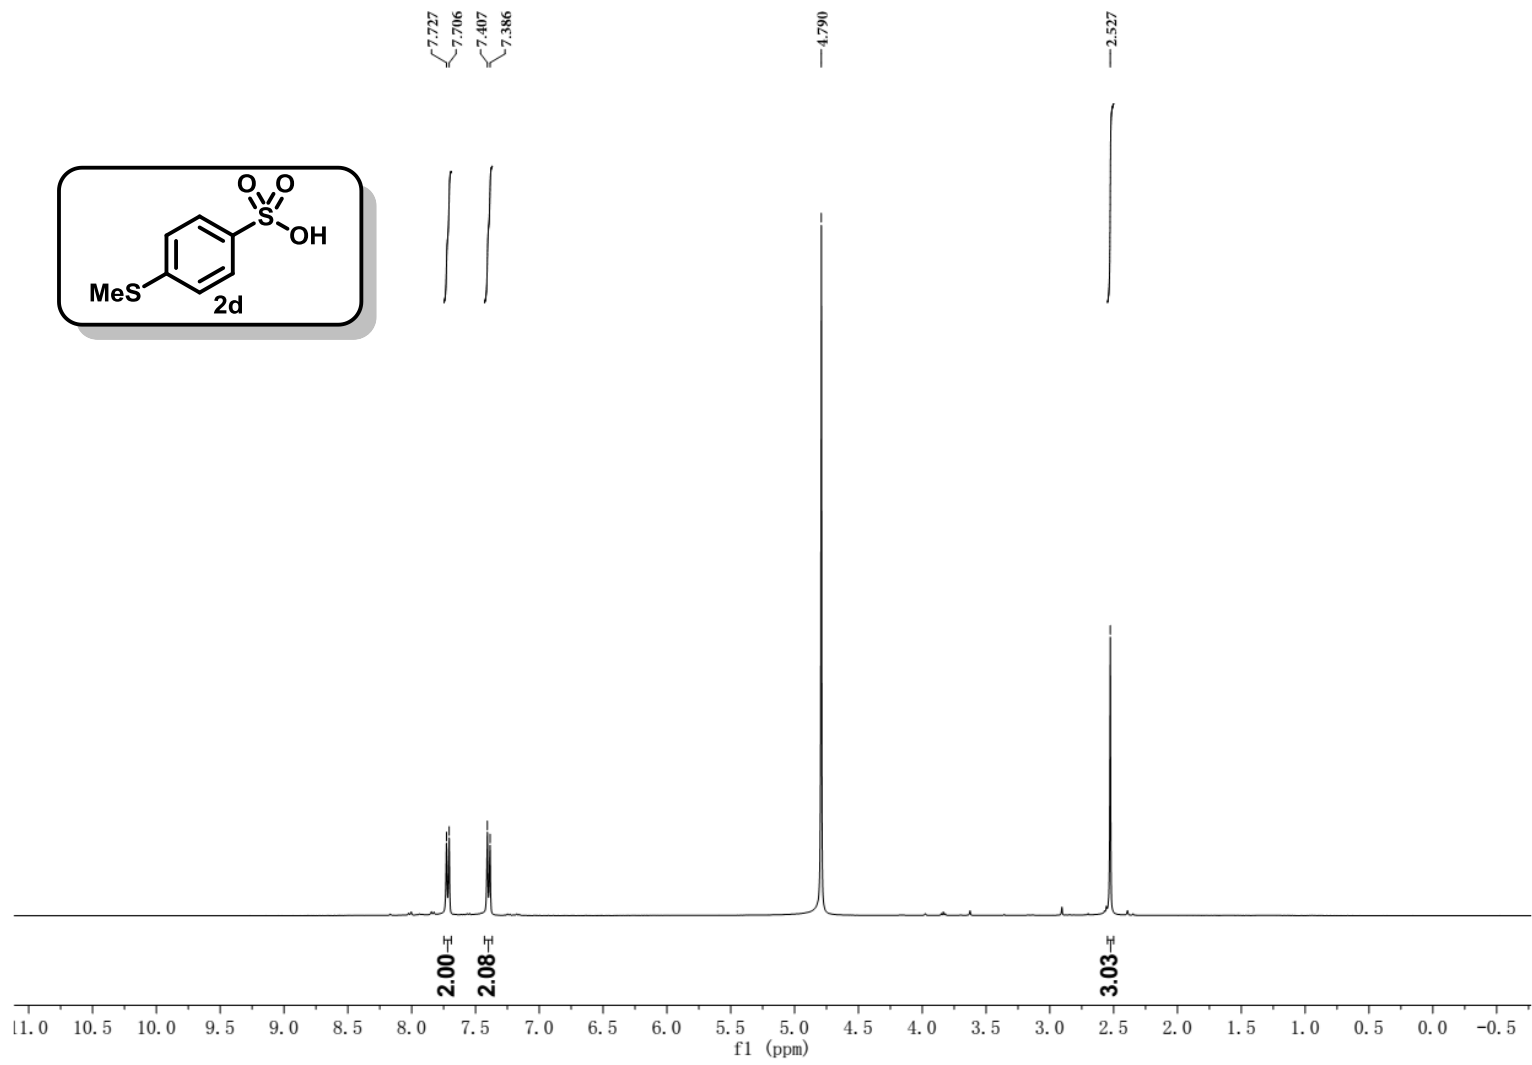



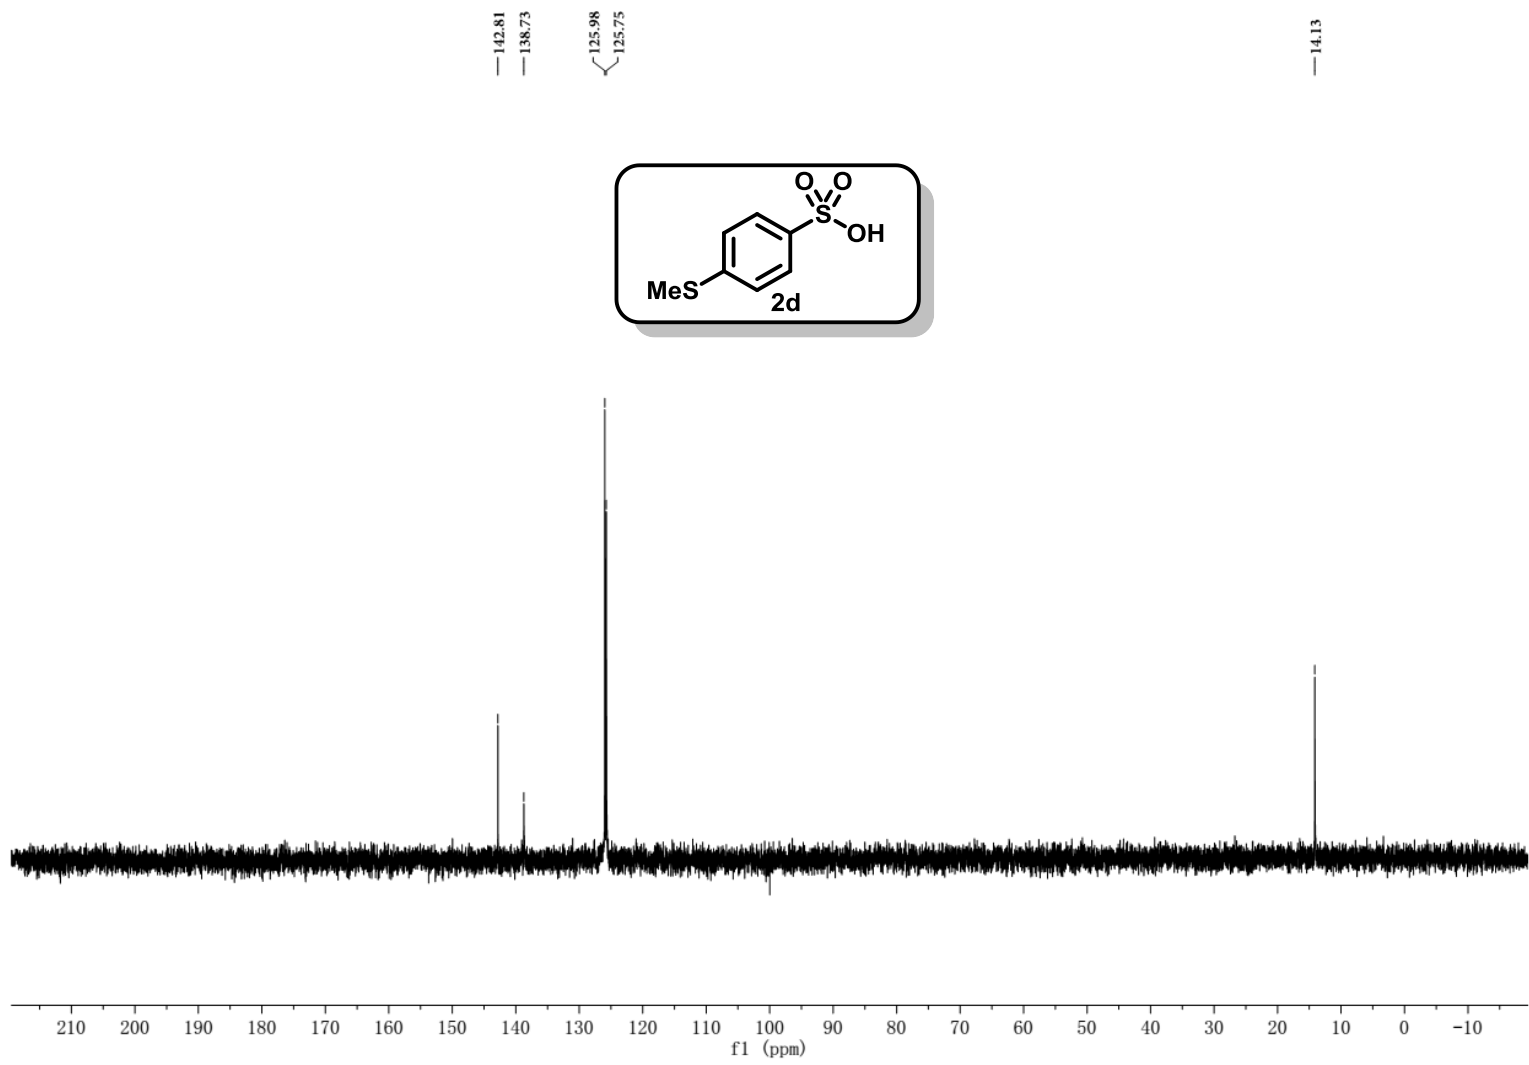

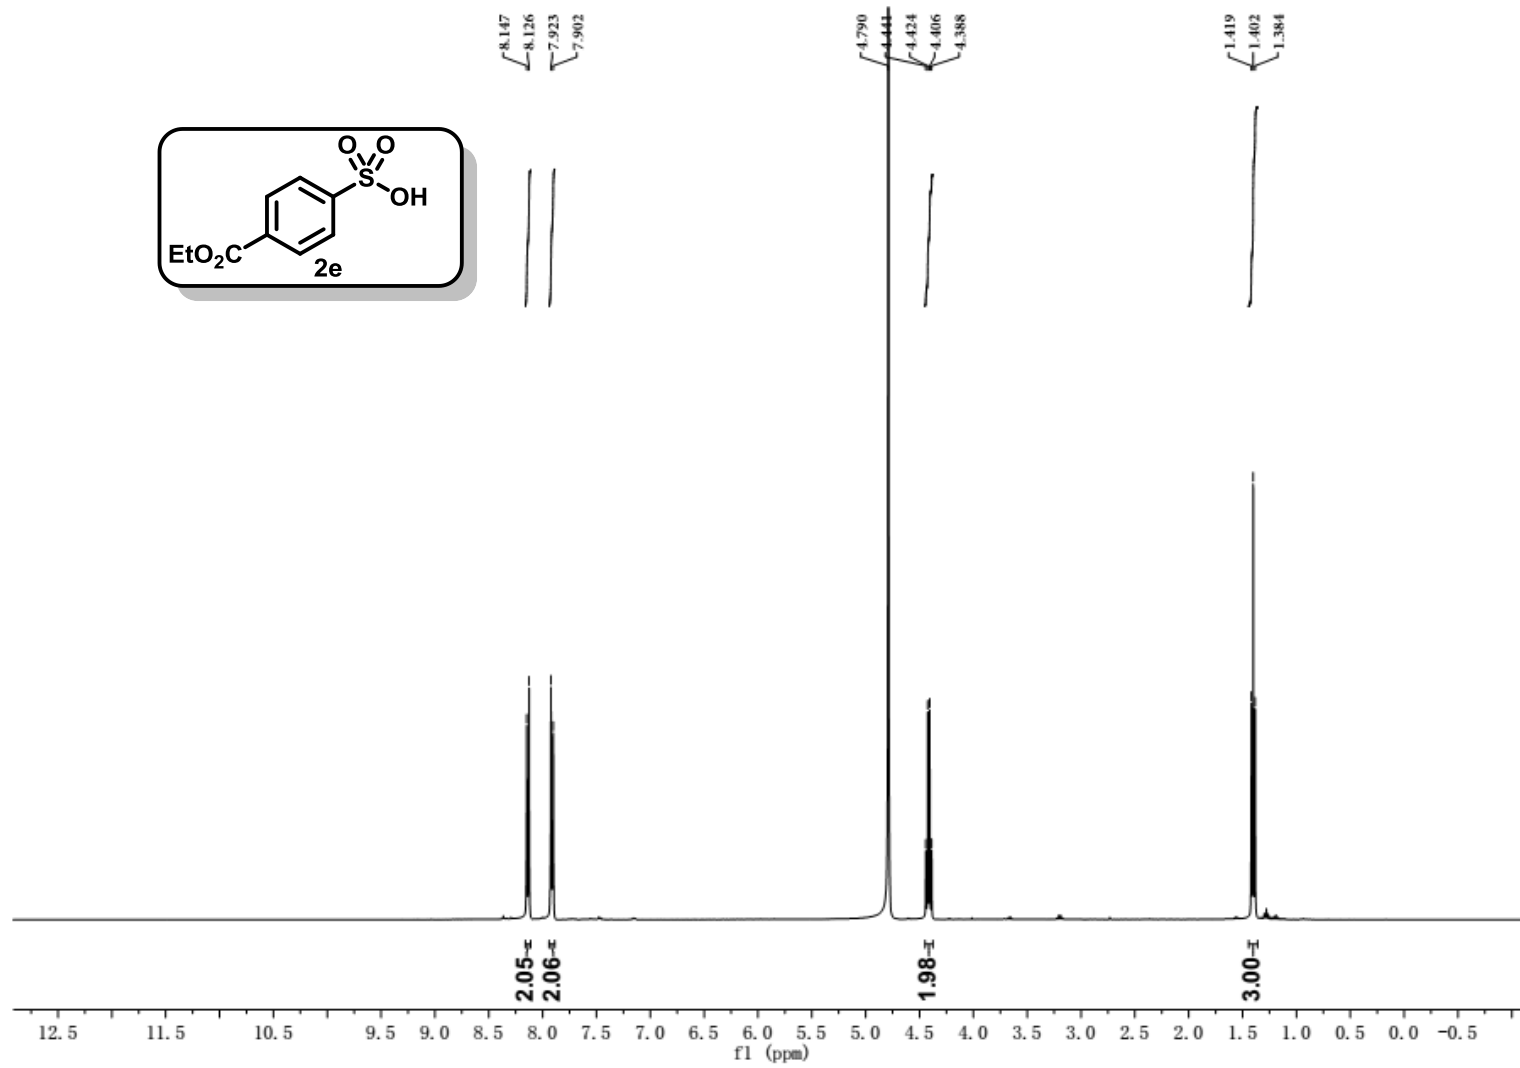

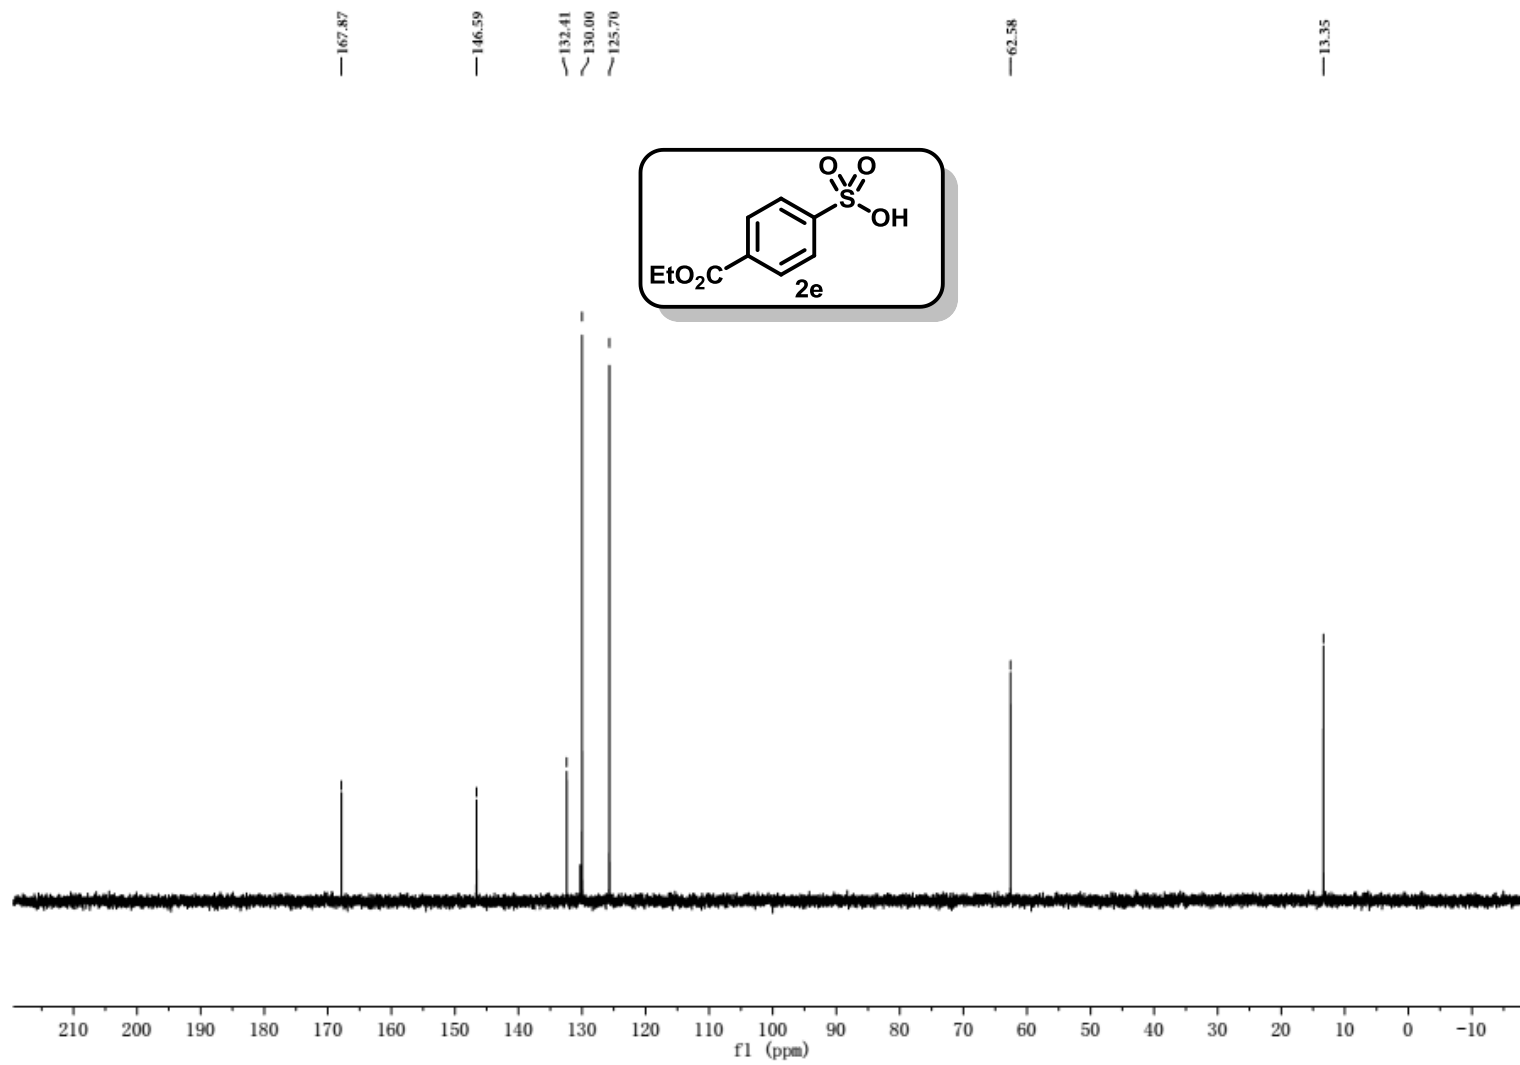

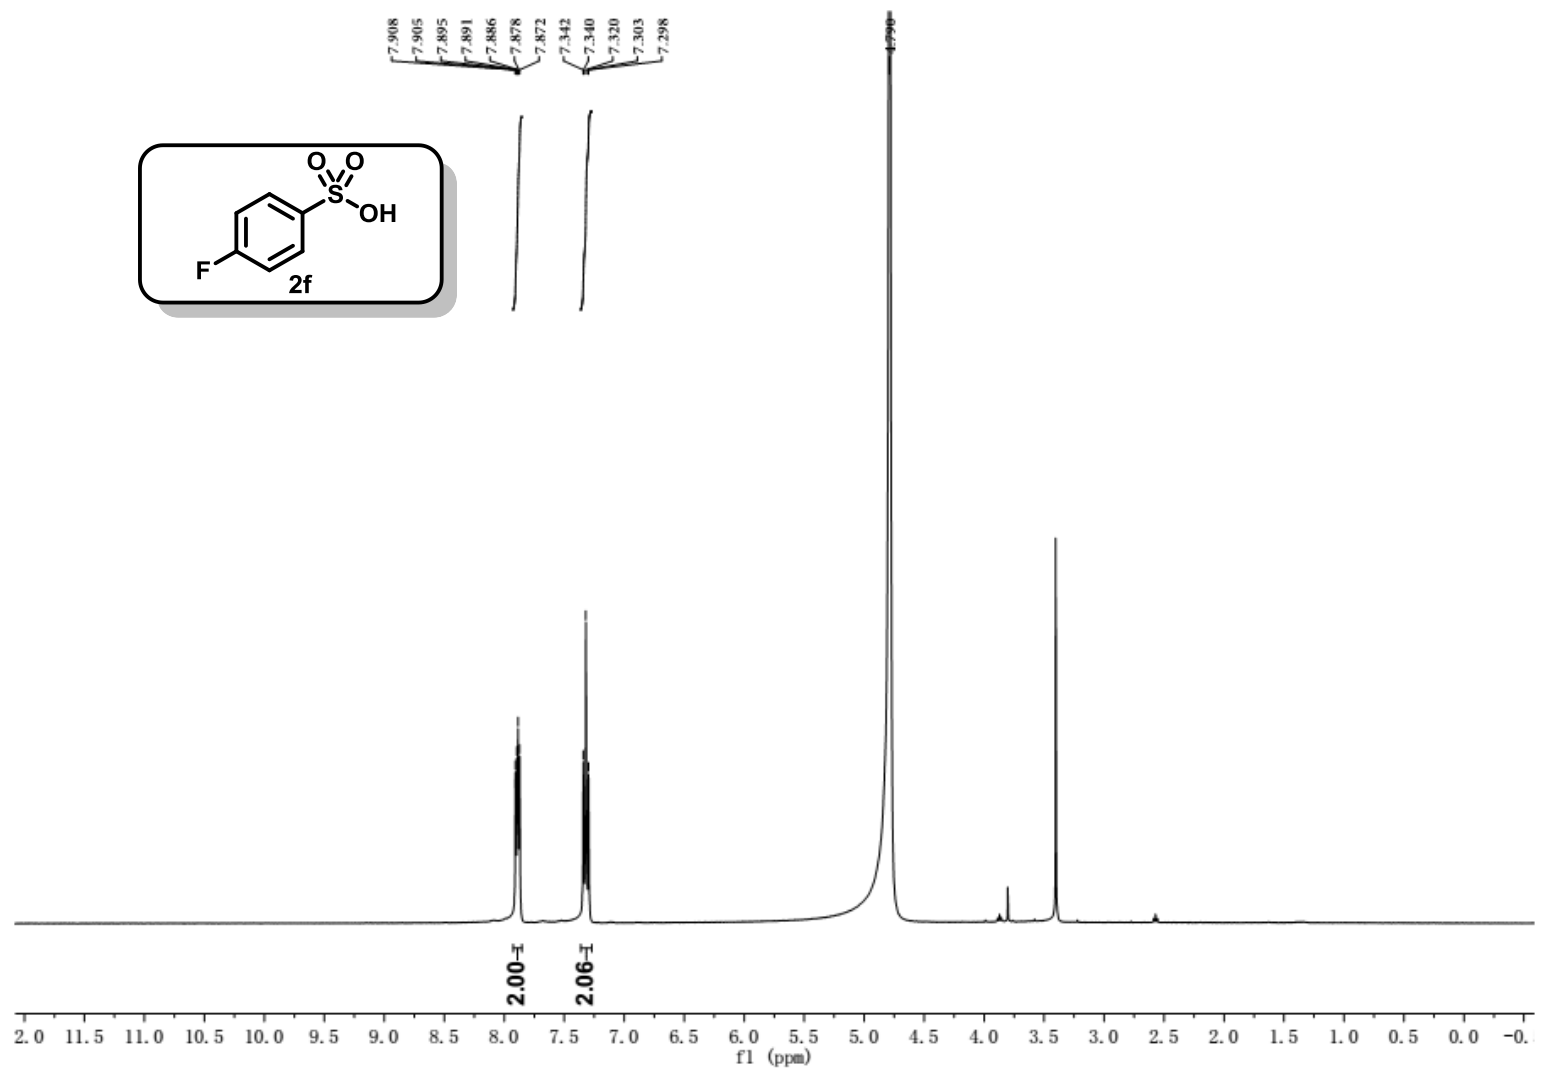

165.348  
162.873

138.559

128.109  
128.017

116.021  
115.797

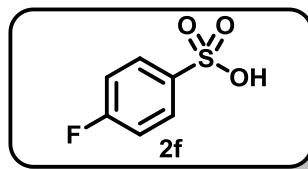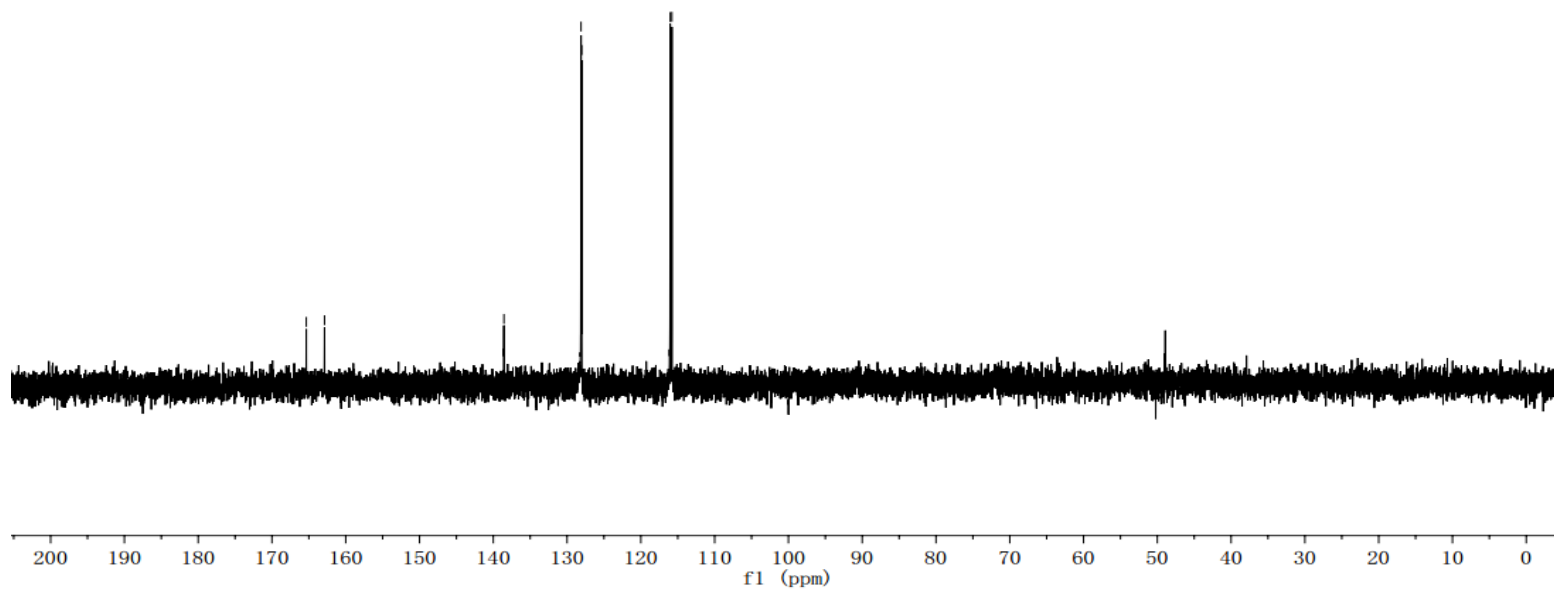

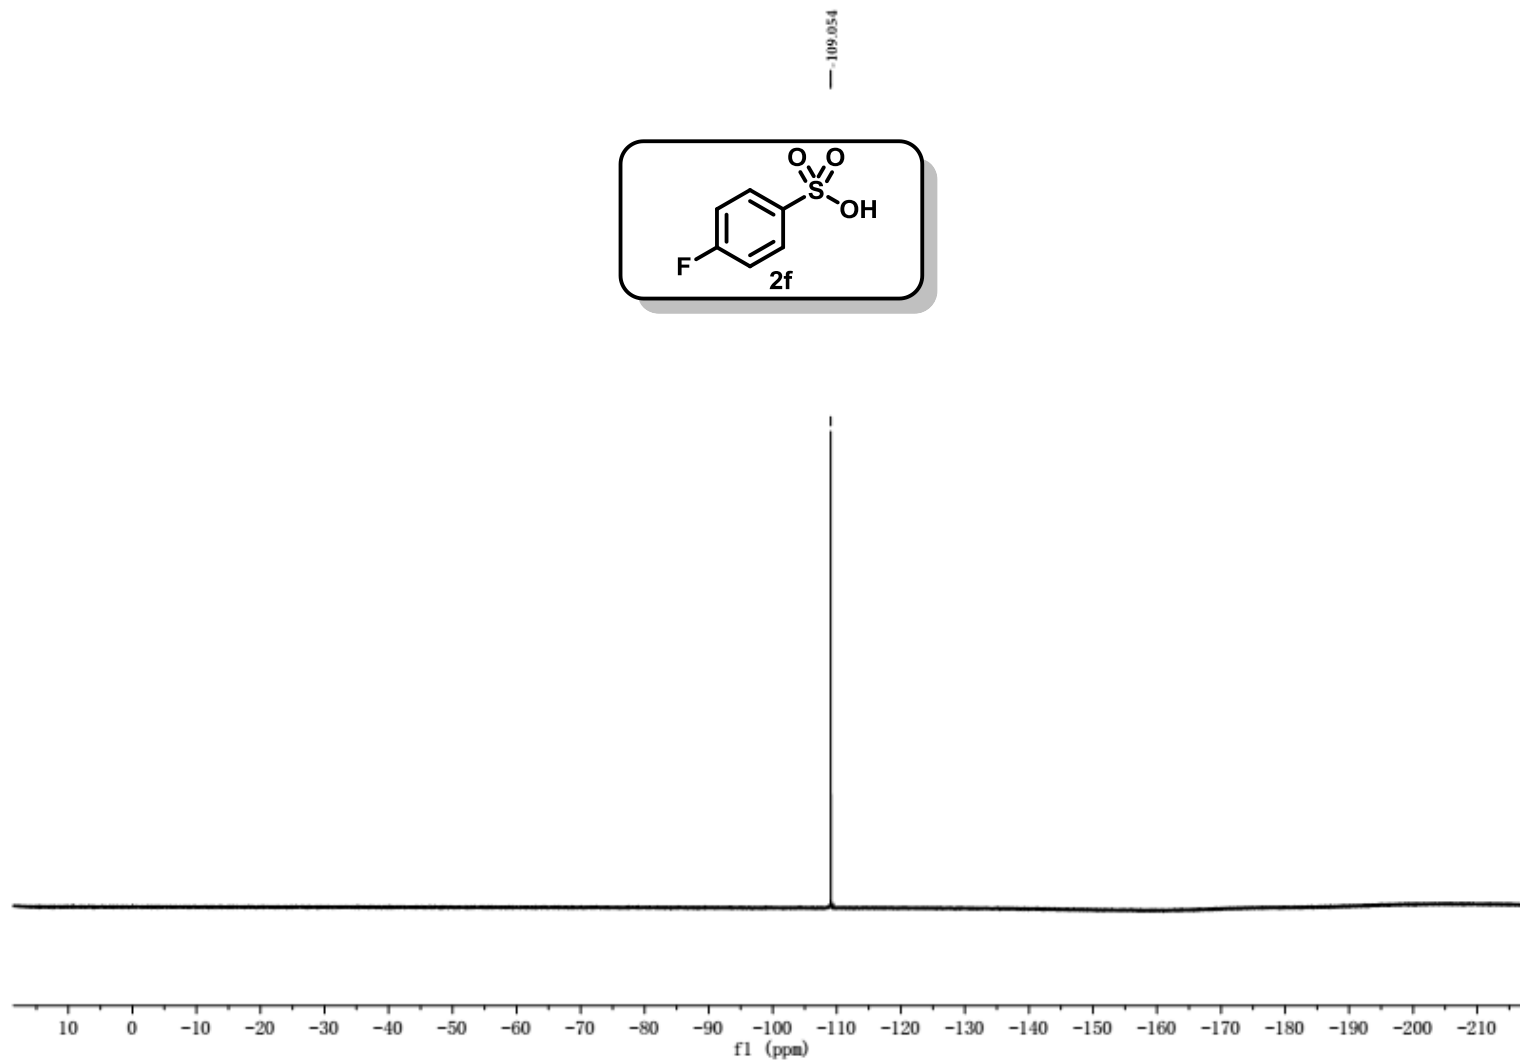

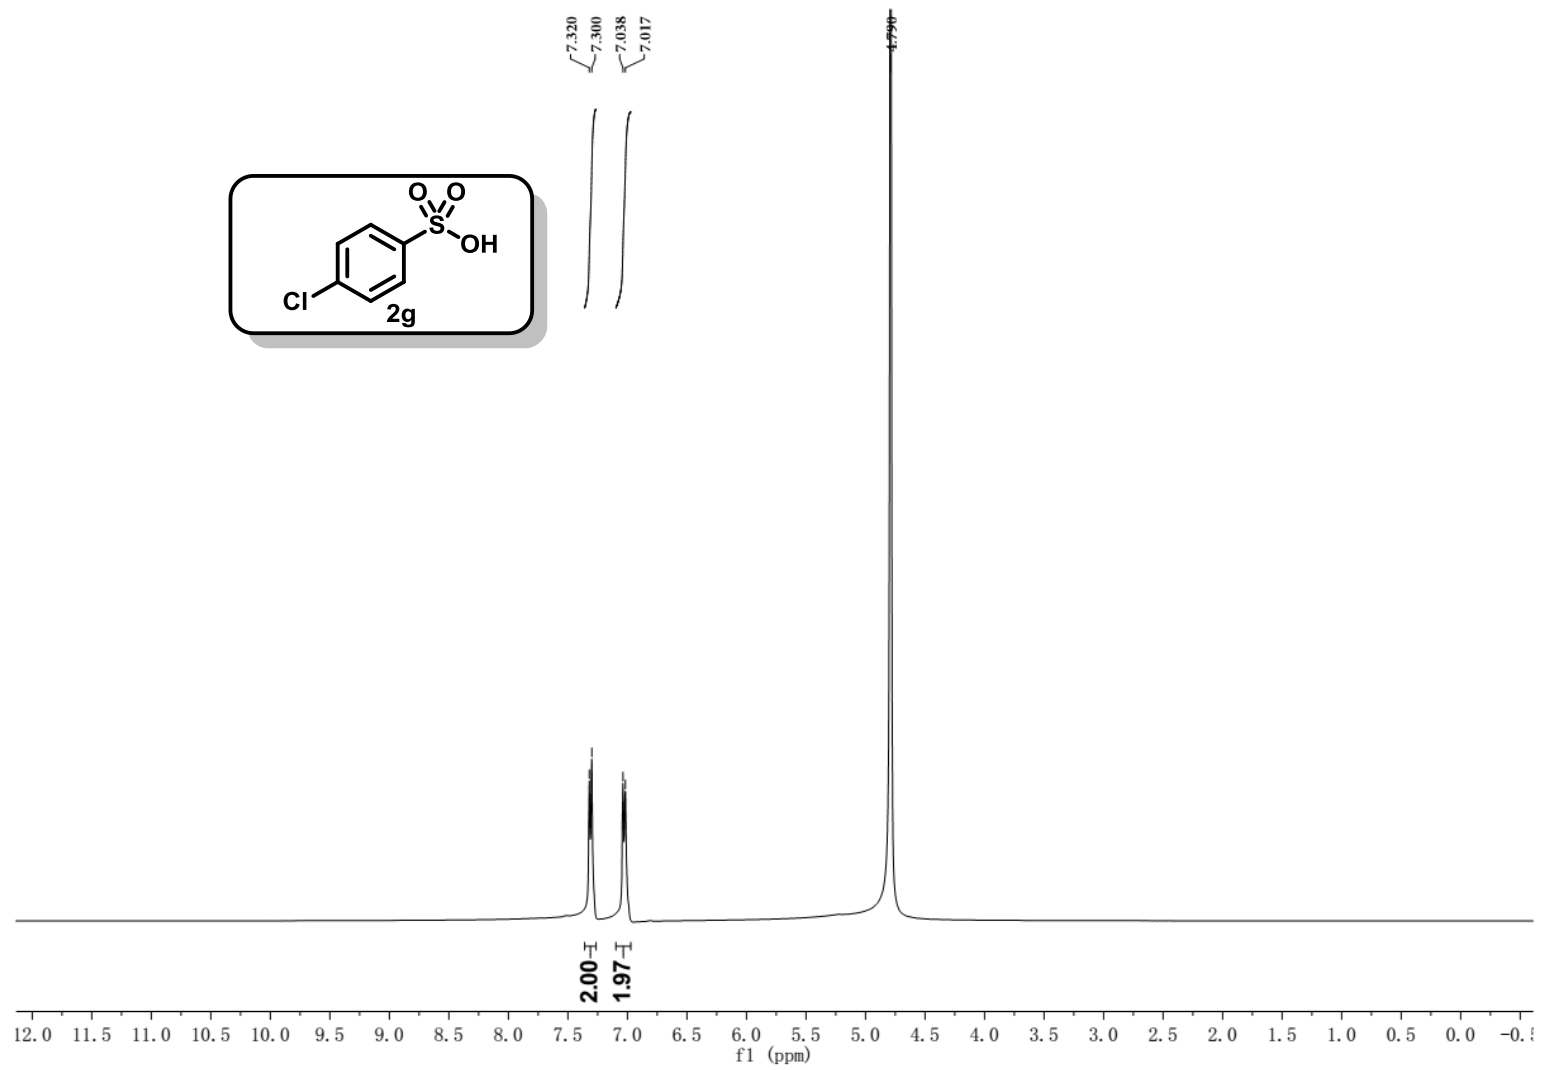

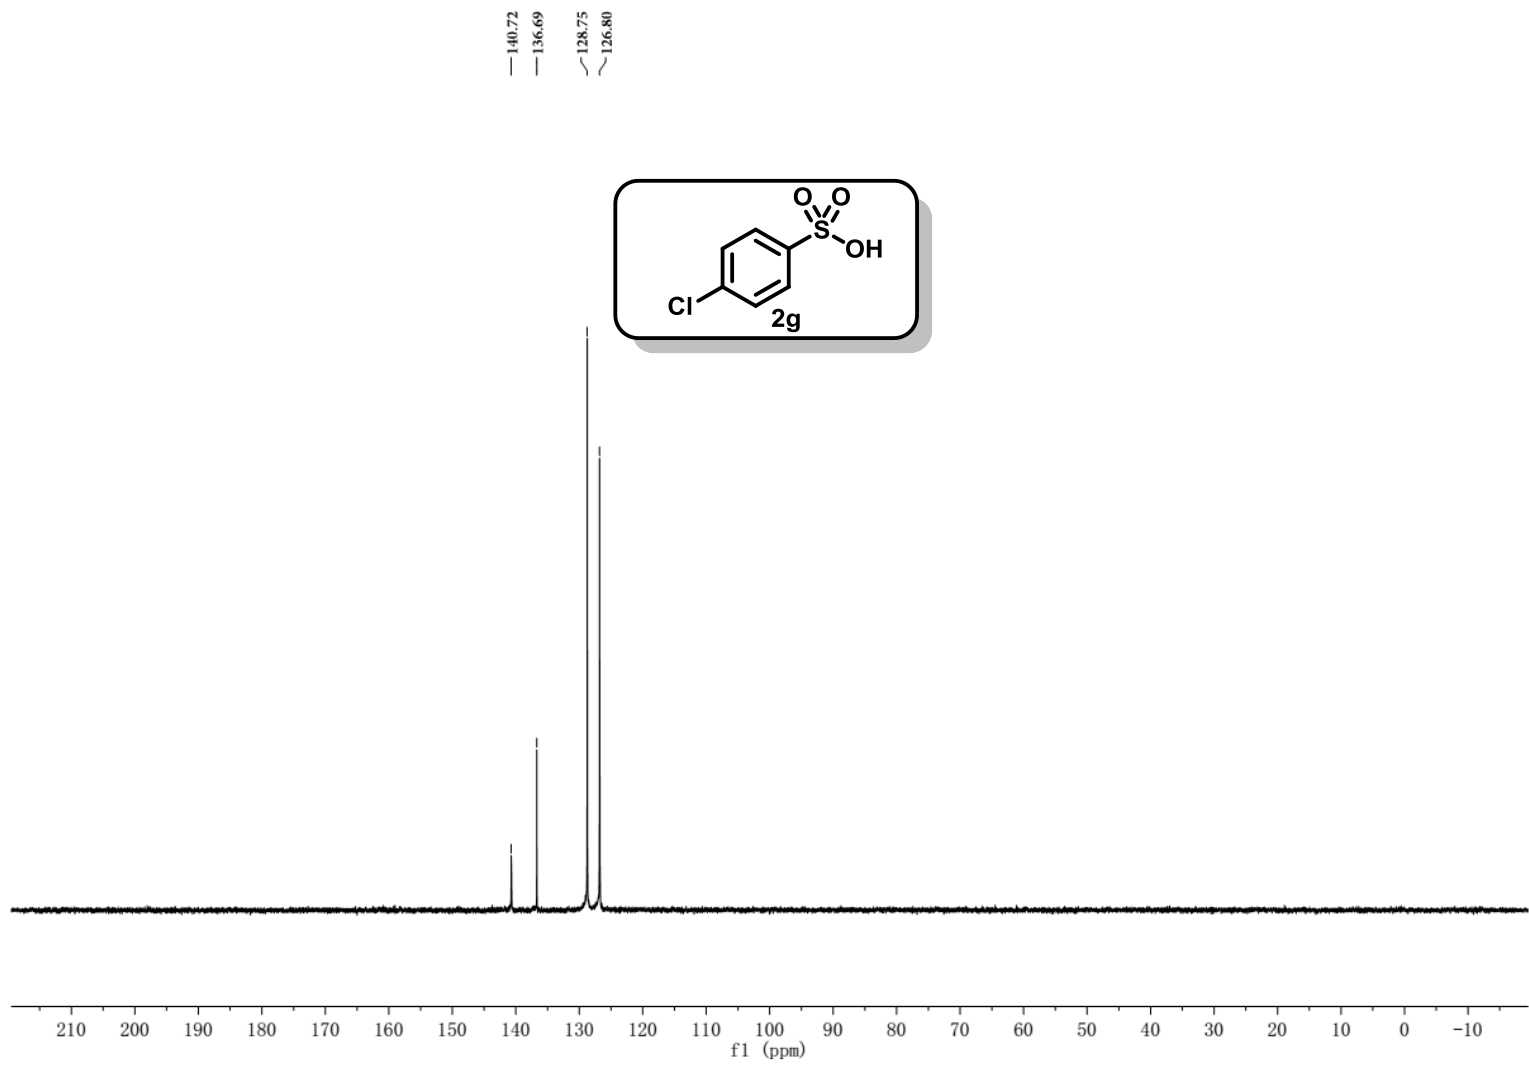



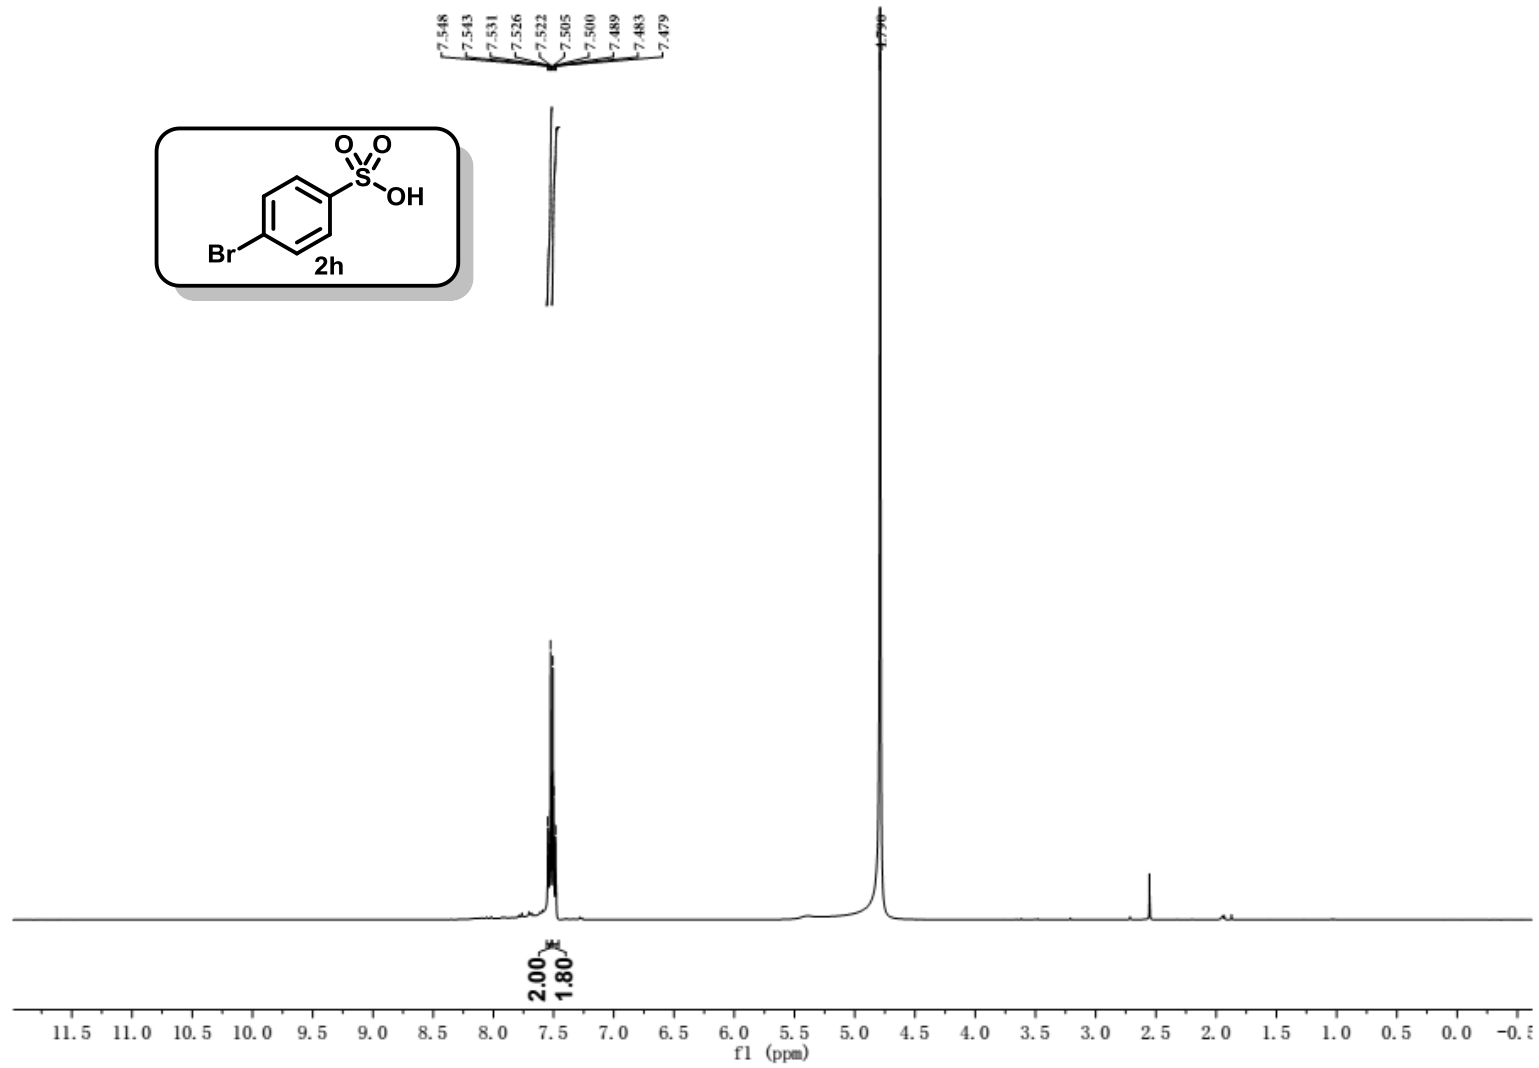

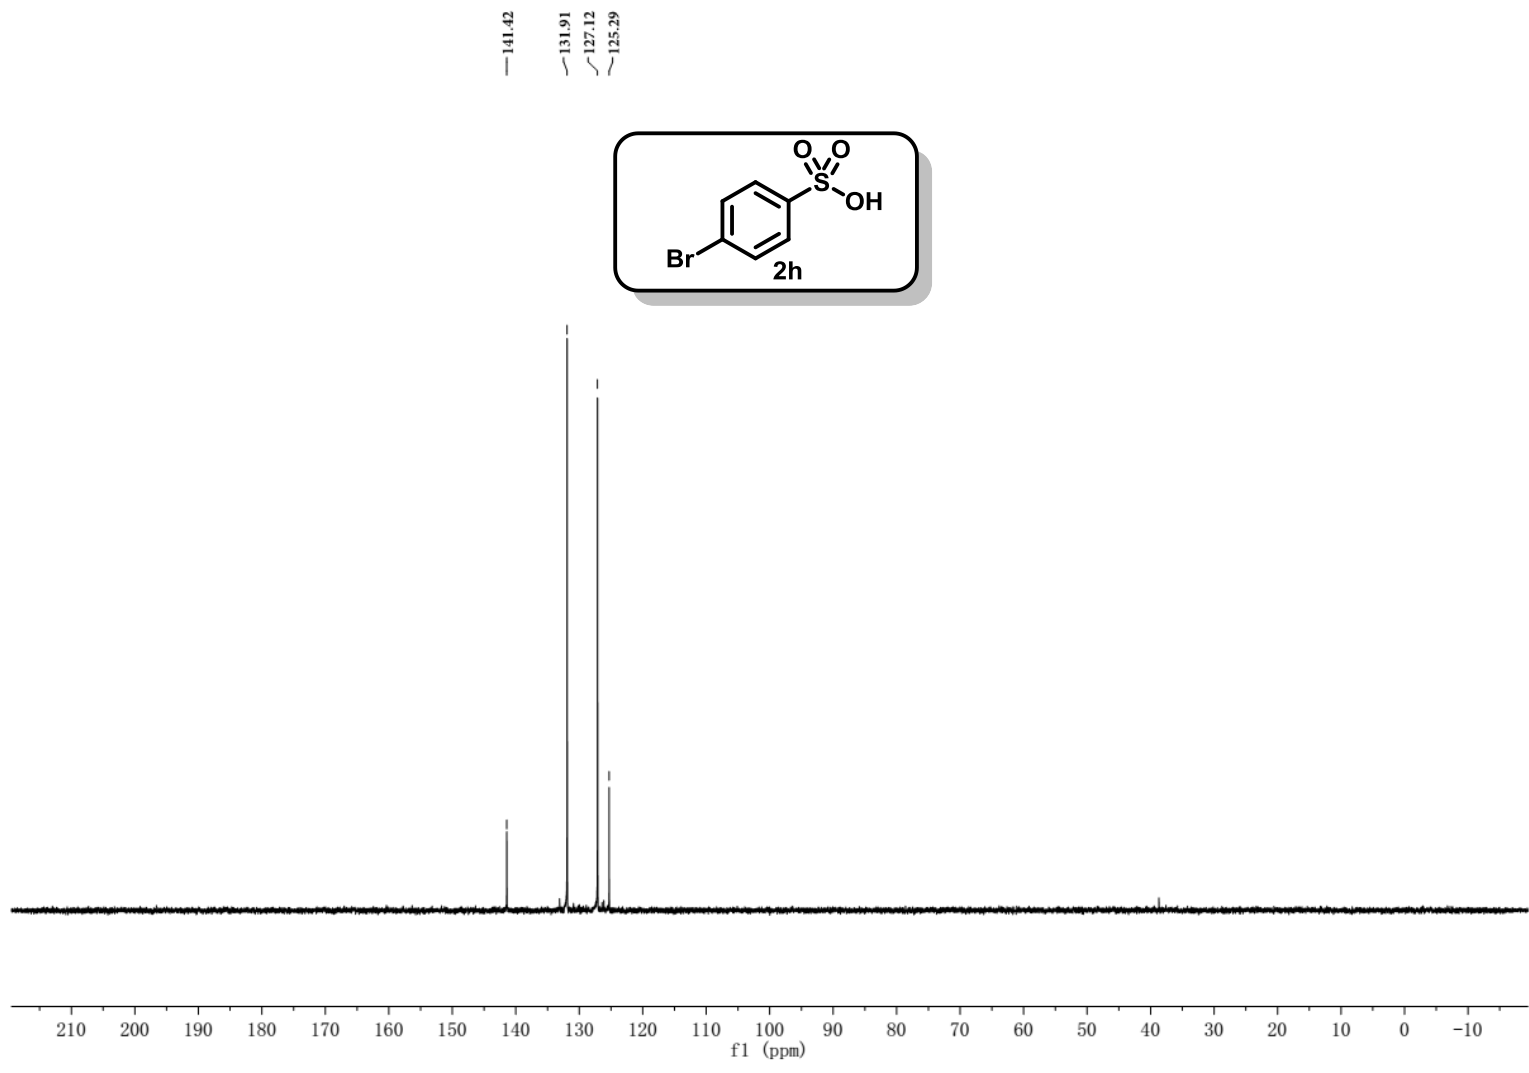

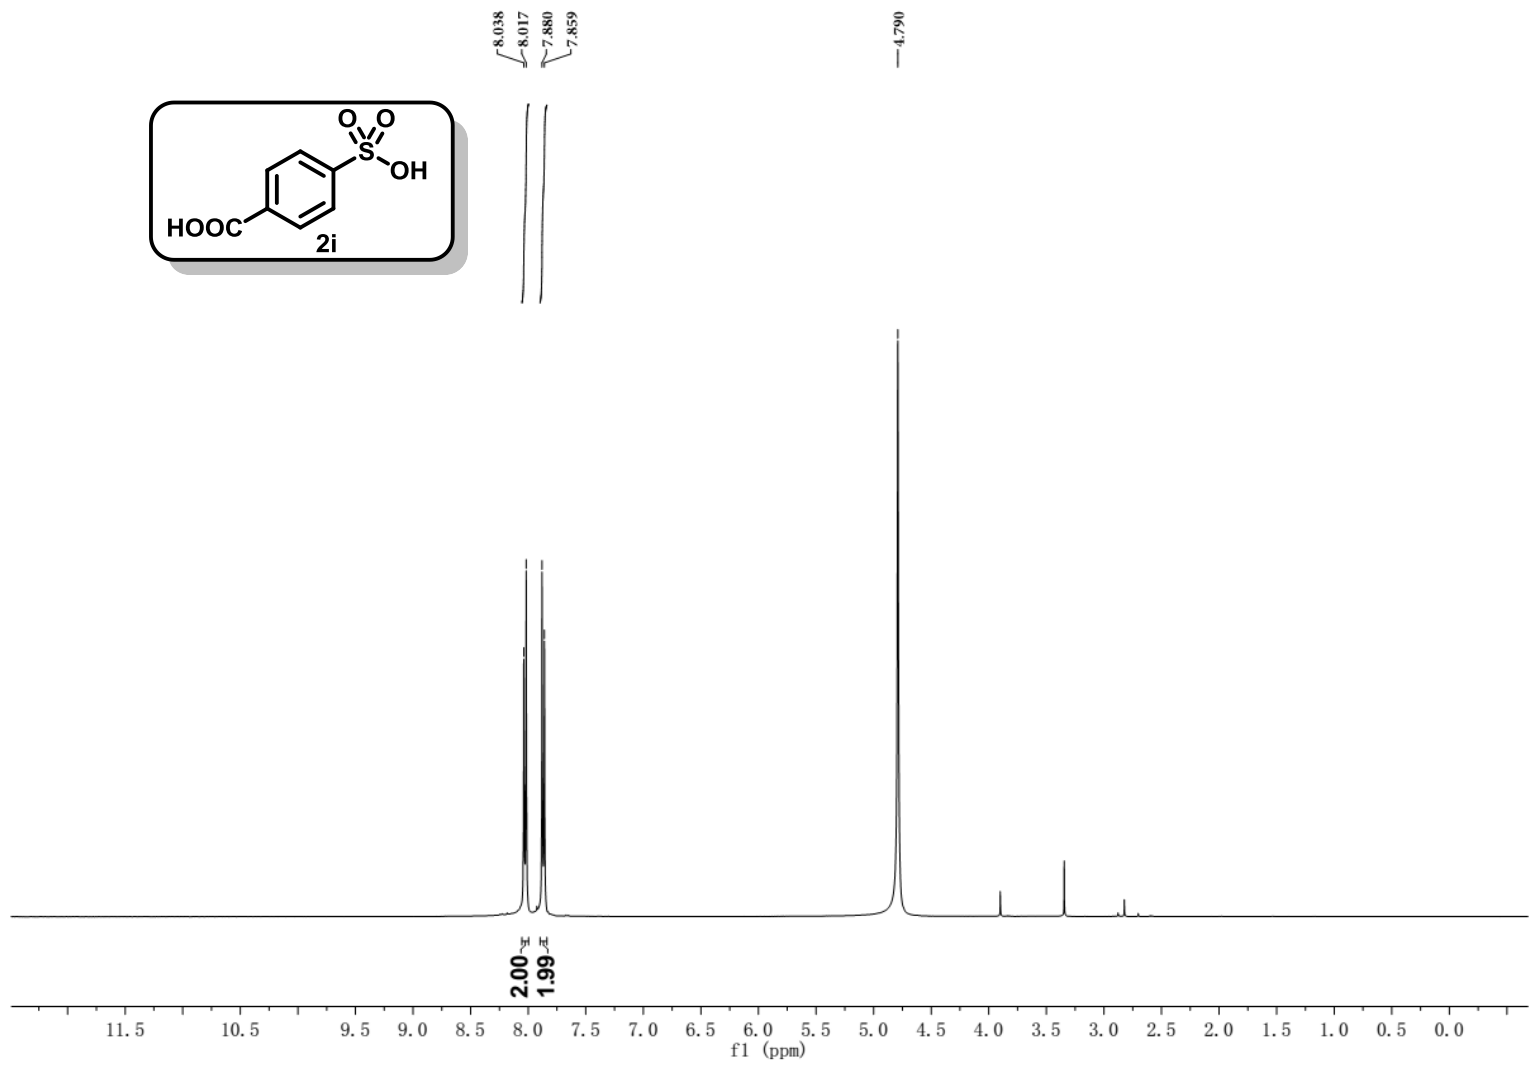

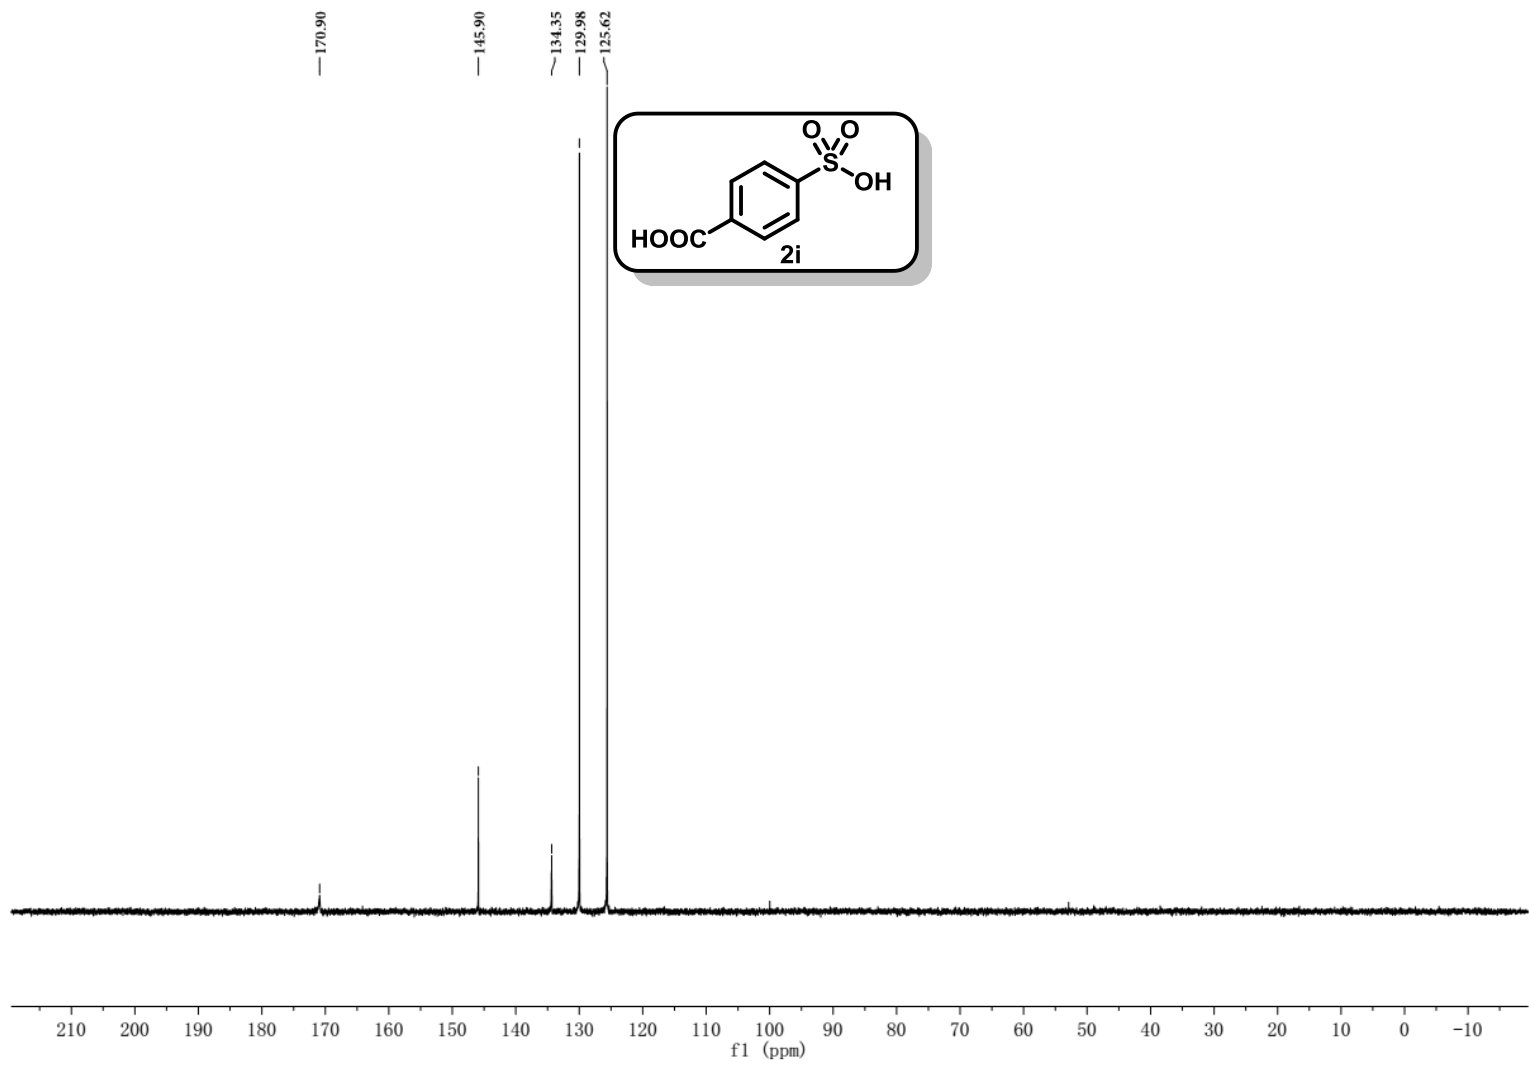

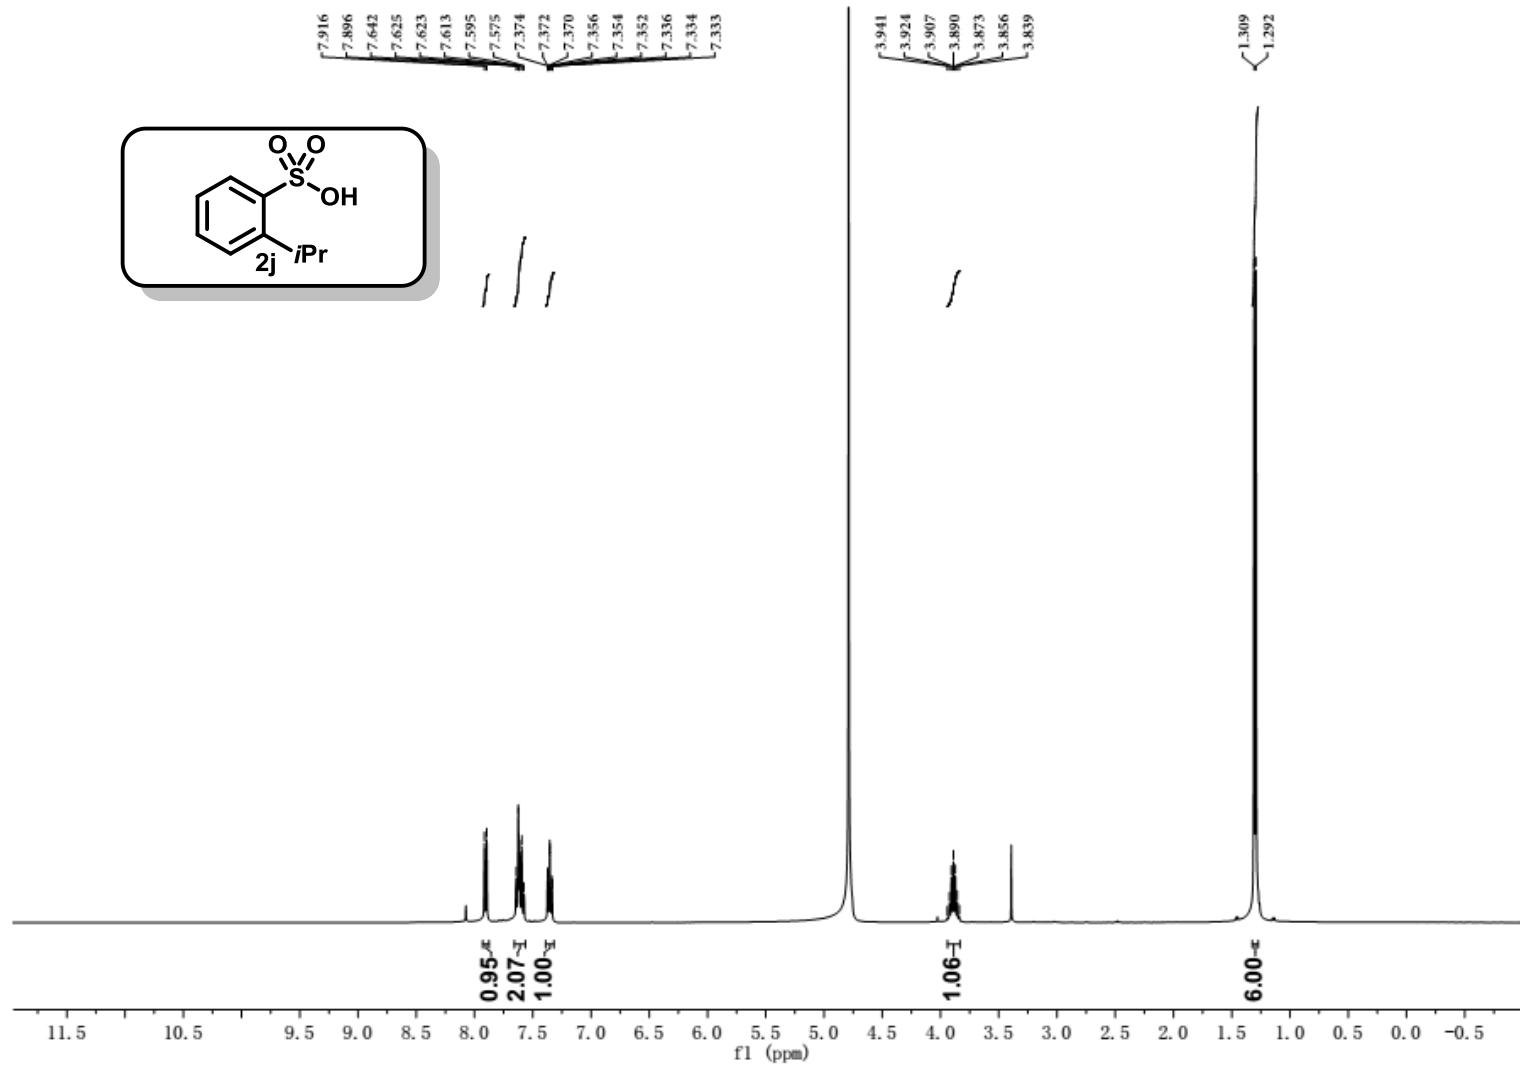

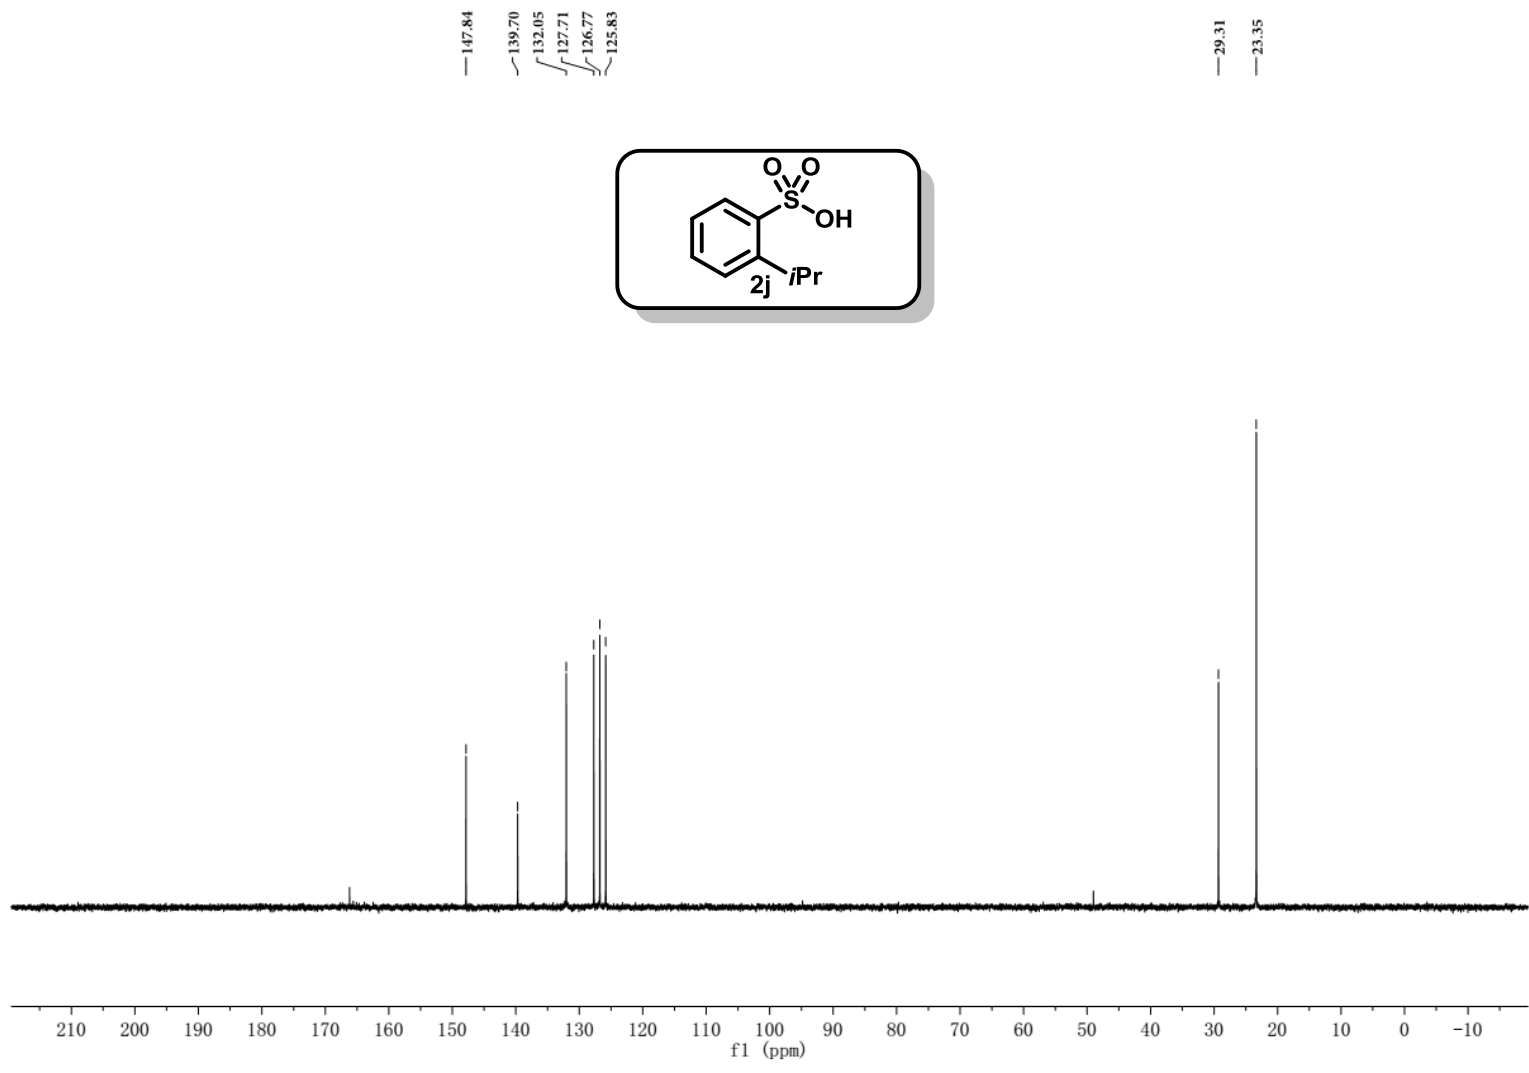

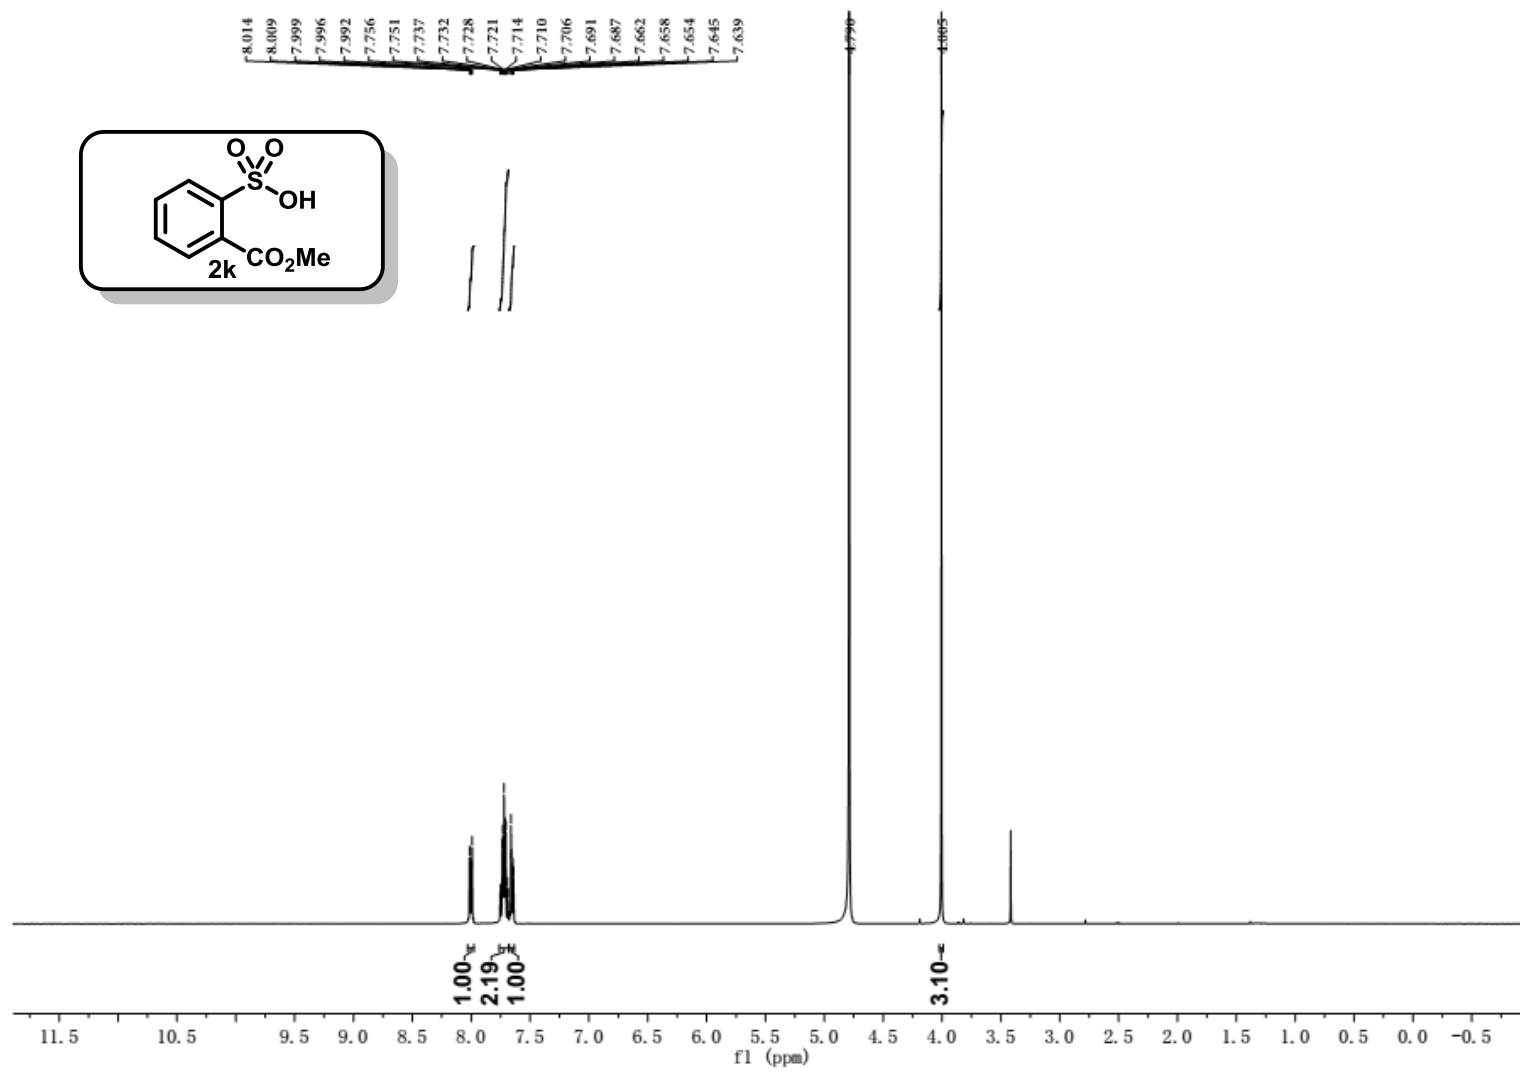

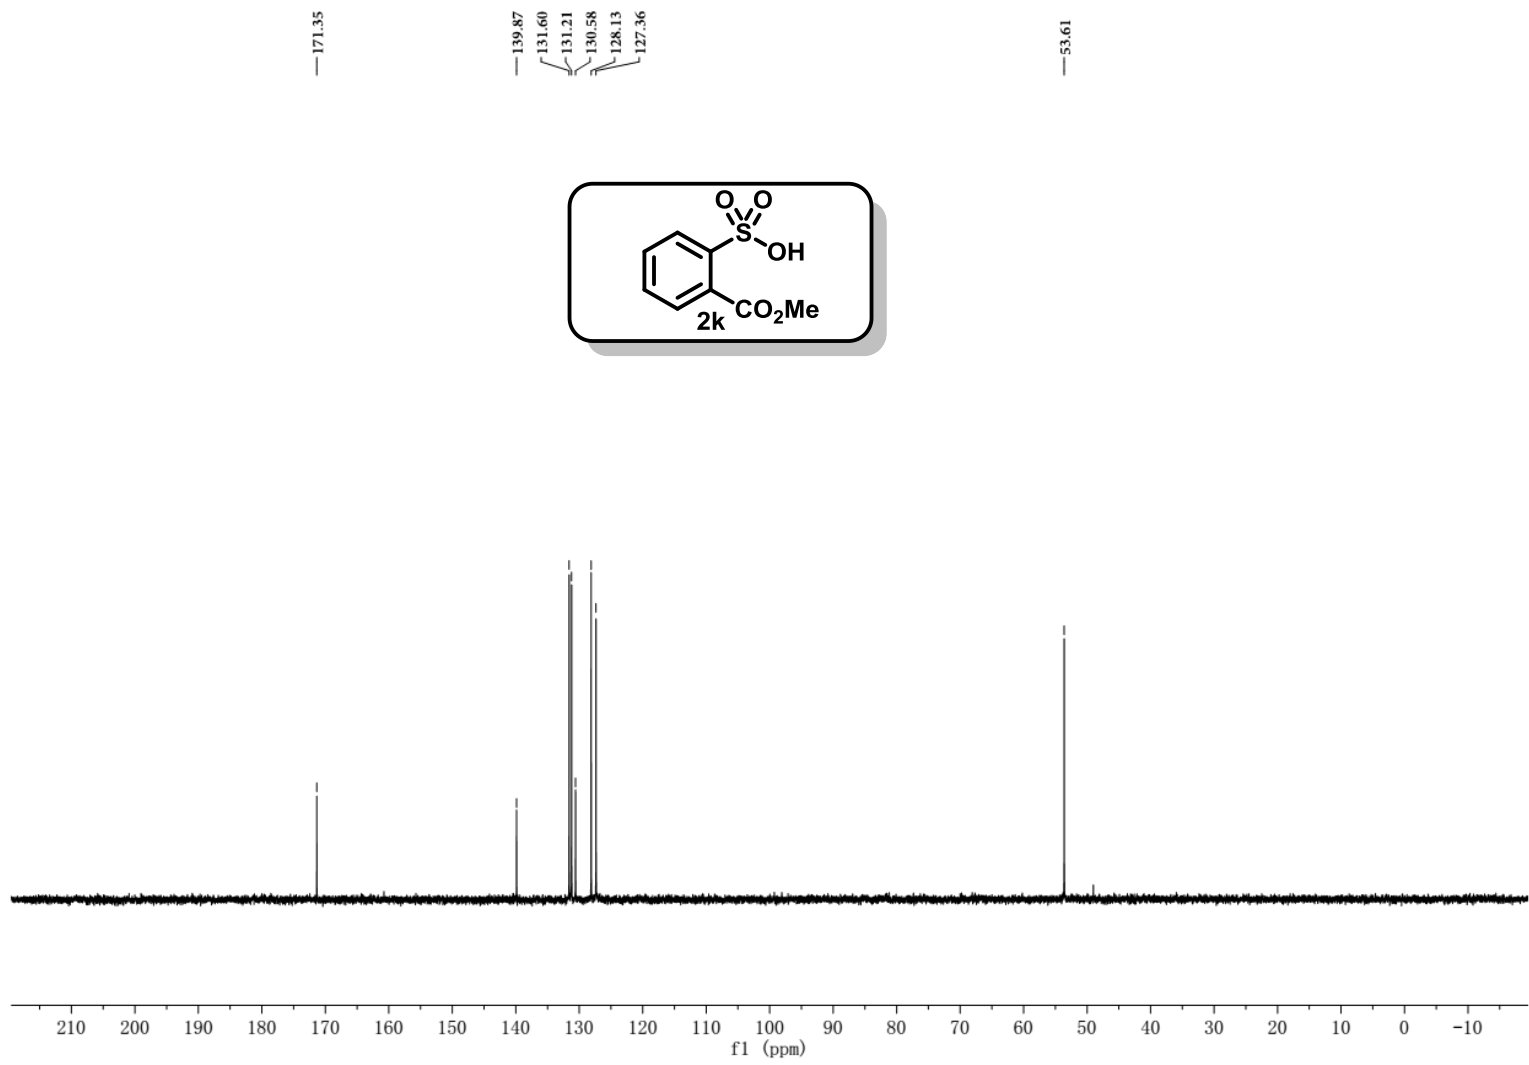



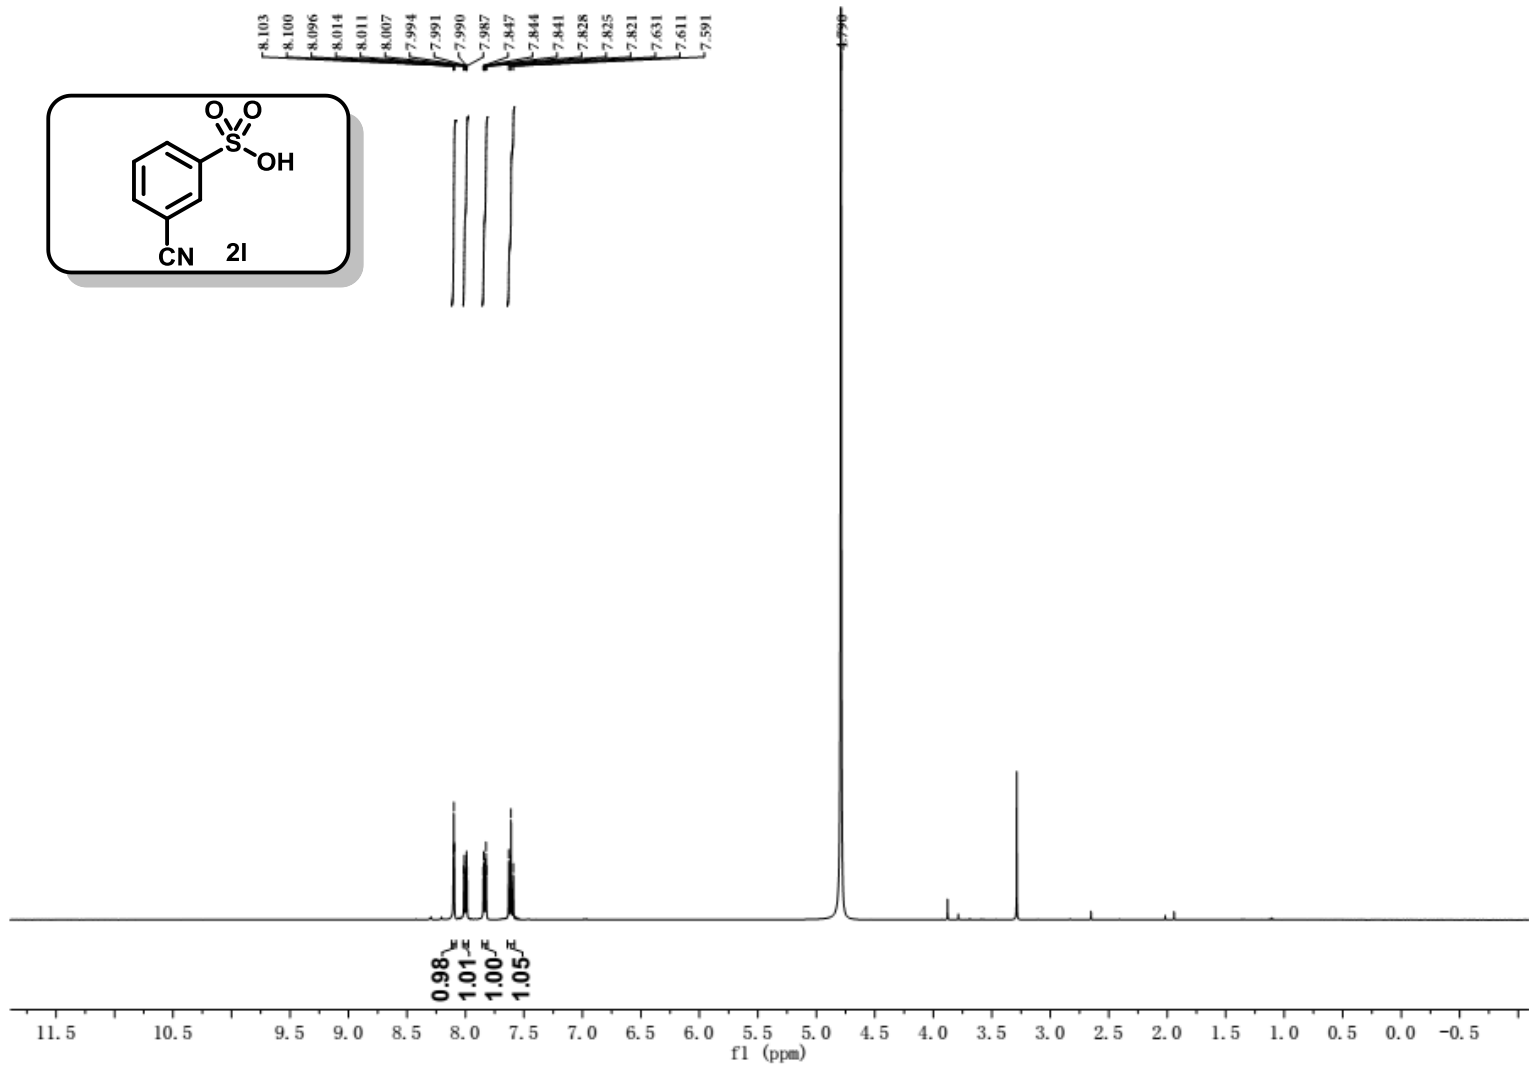

143.610  
135.073  
130.207  
130.043  
129.394  
118.547  
111.893

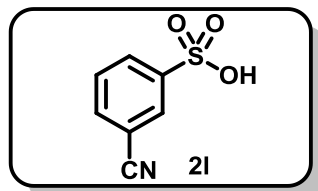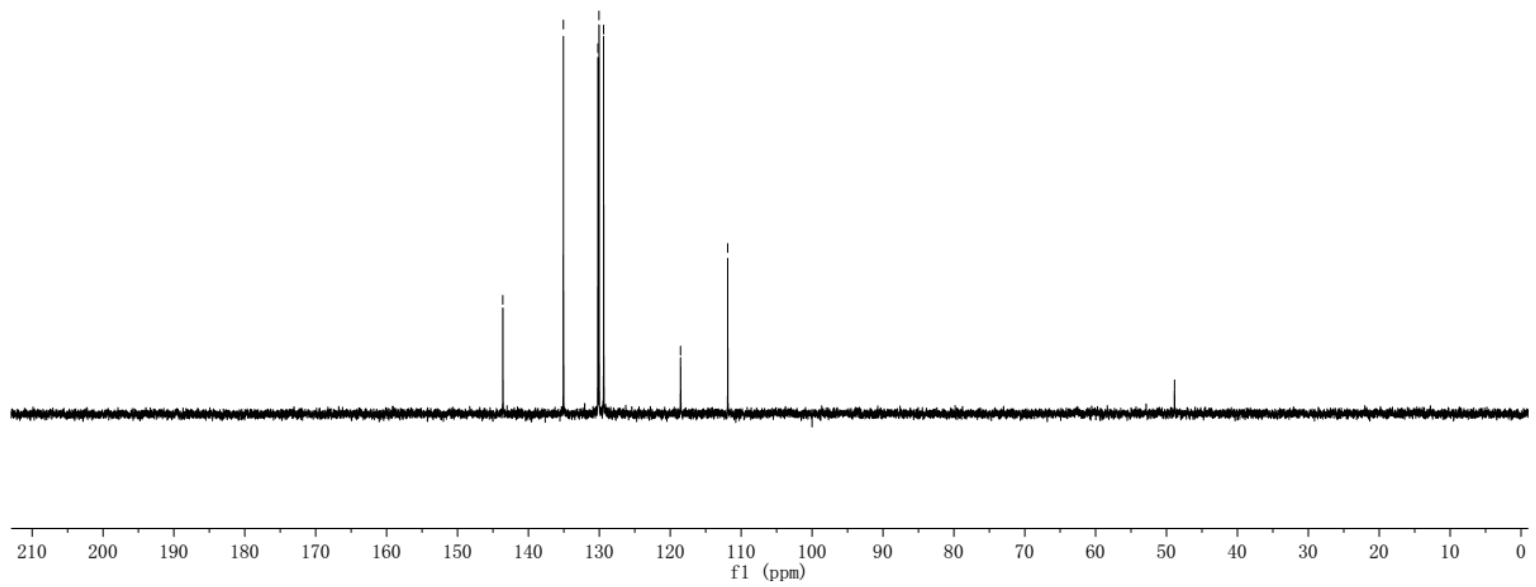

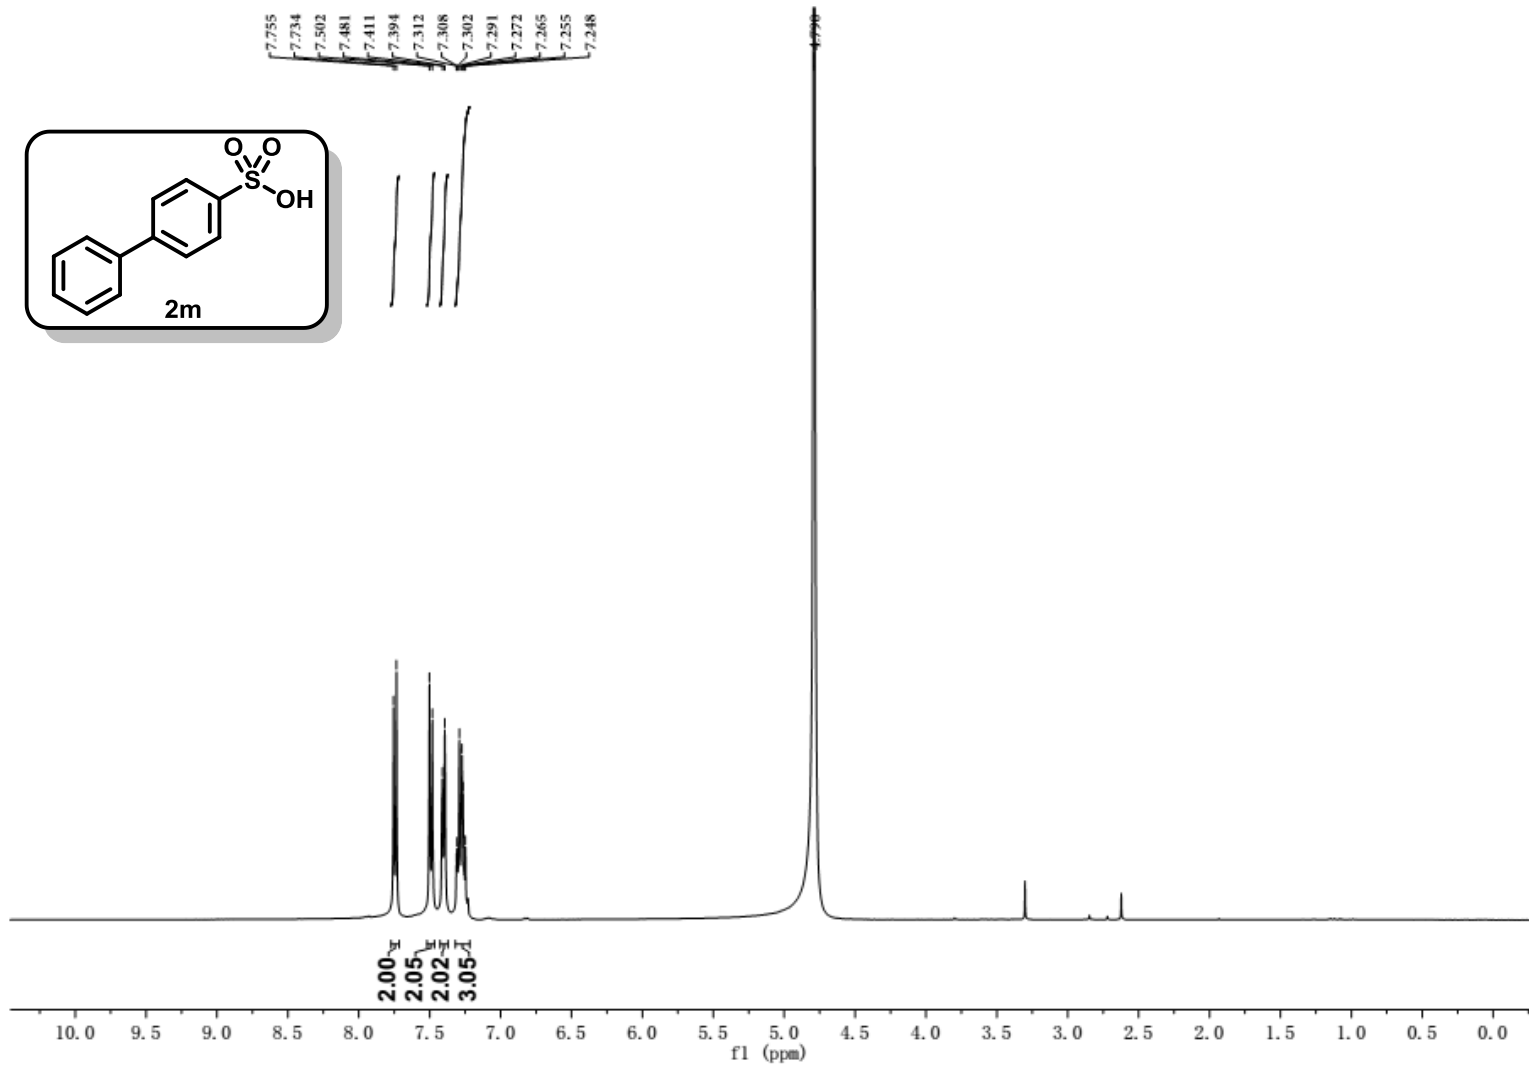

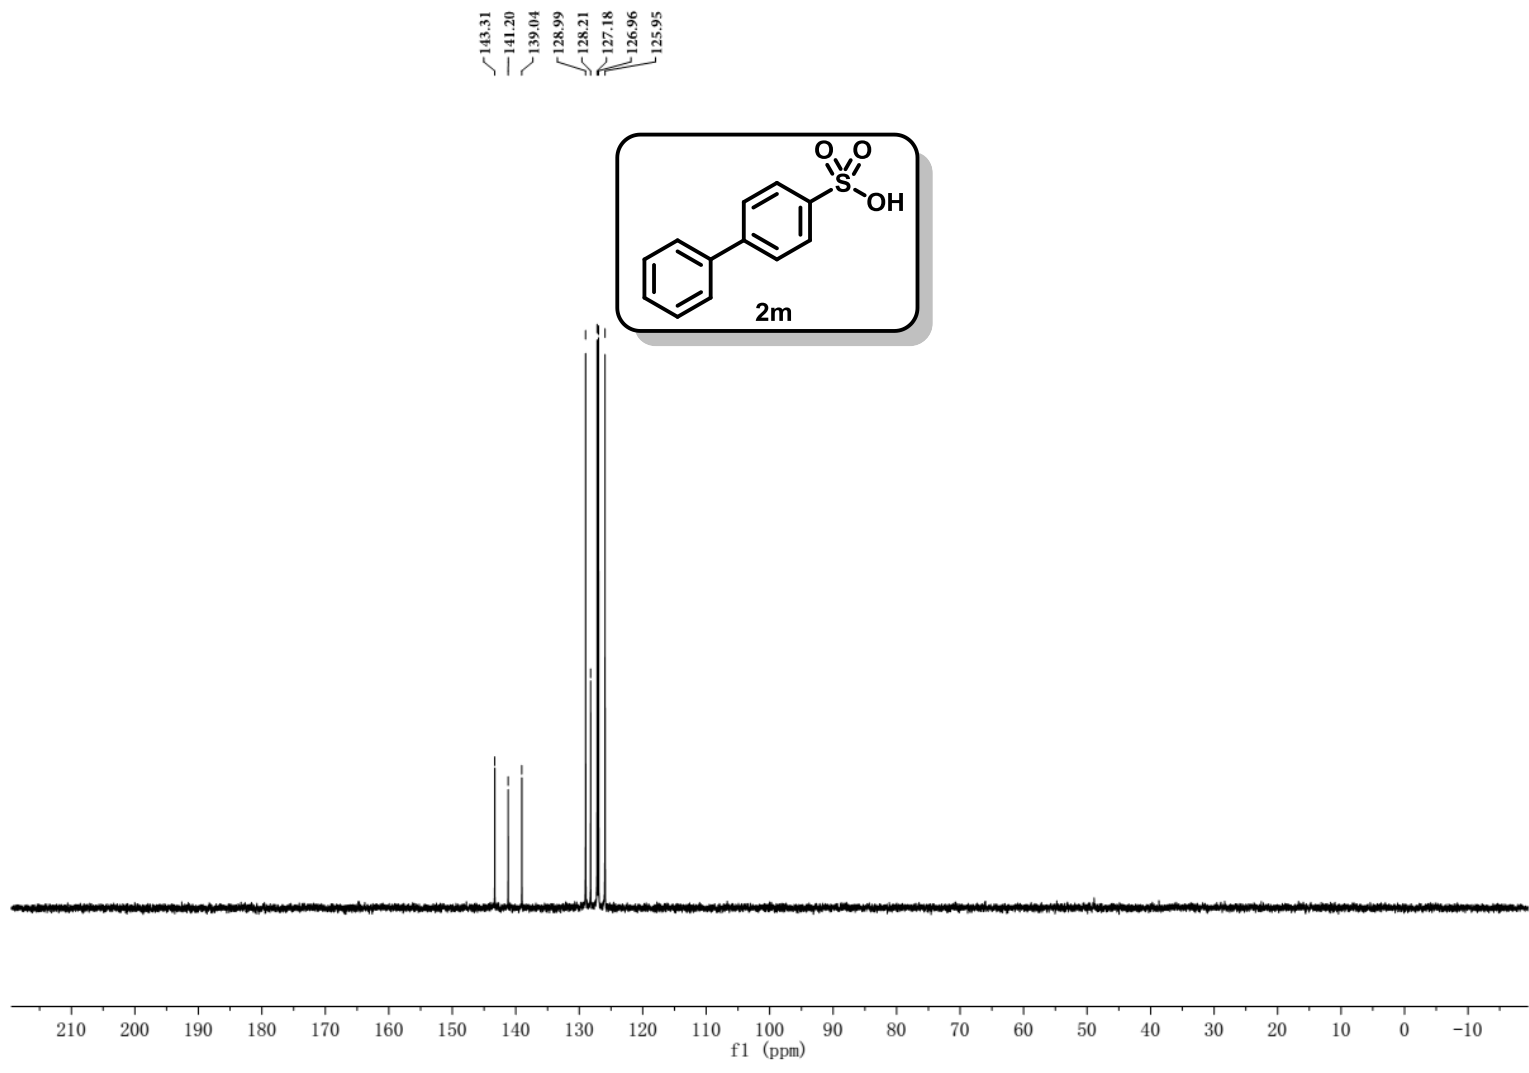

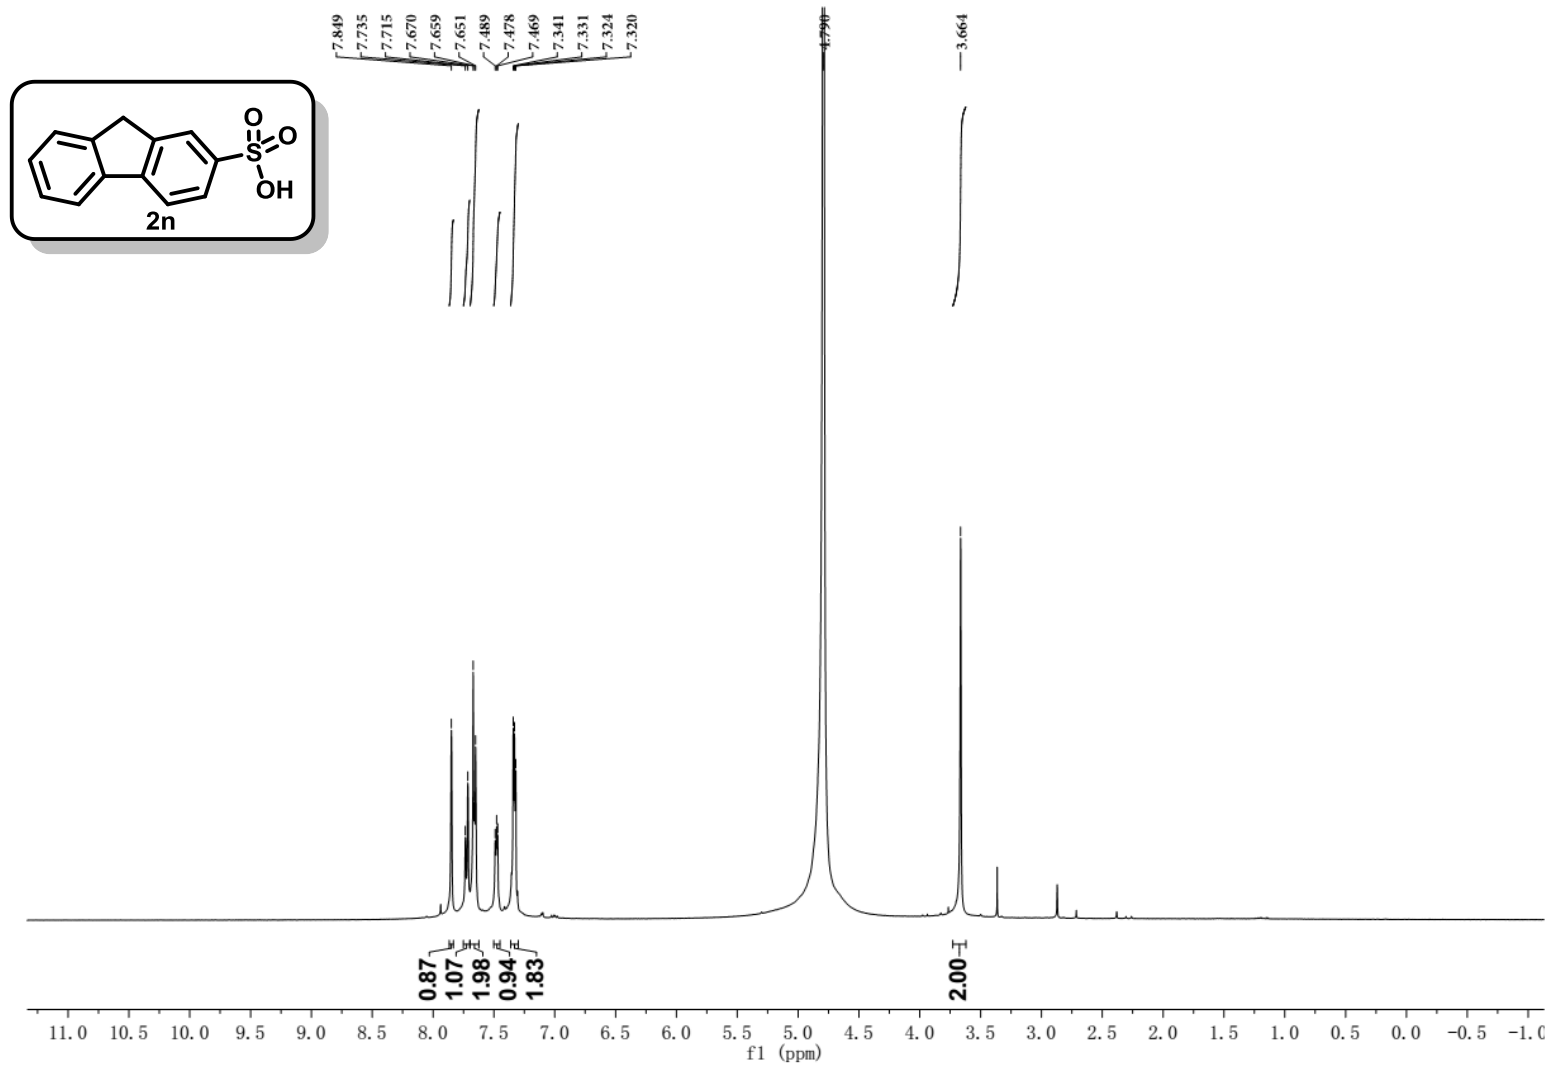

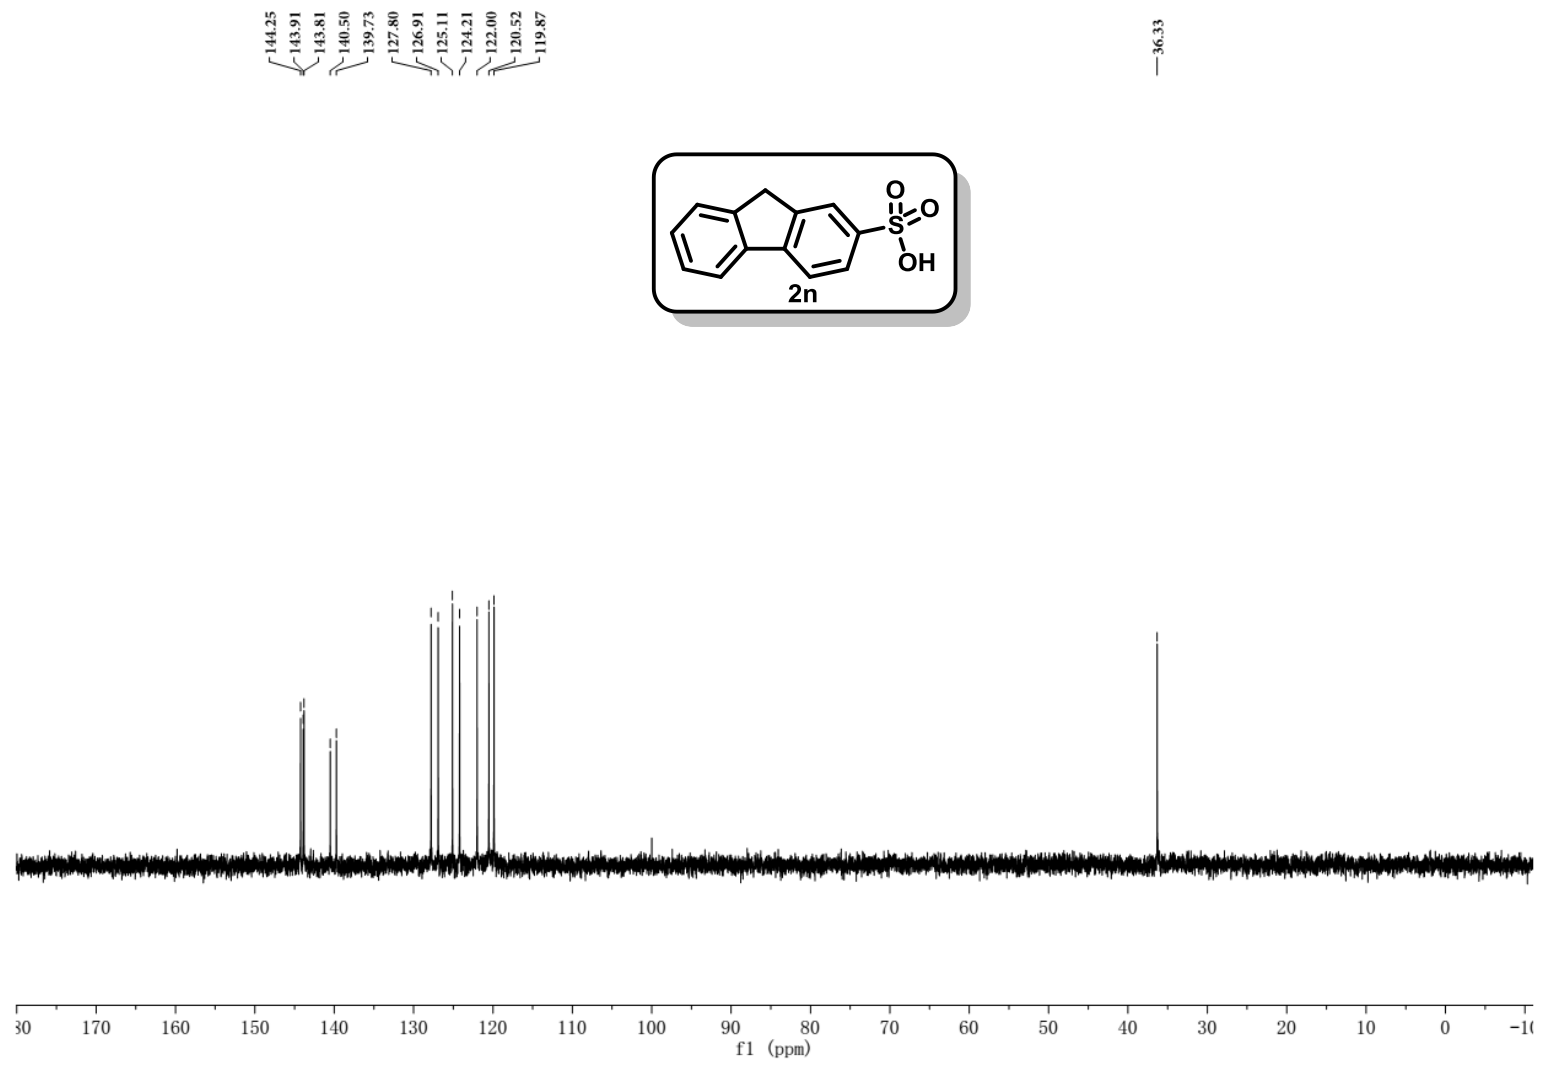

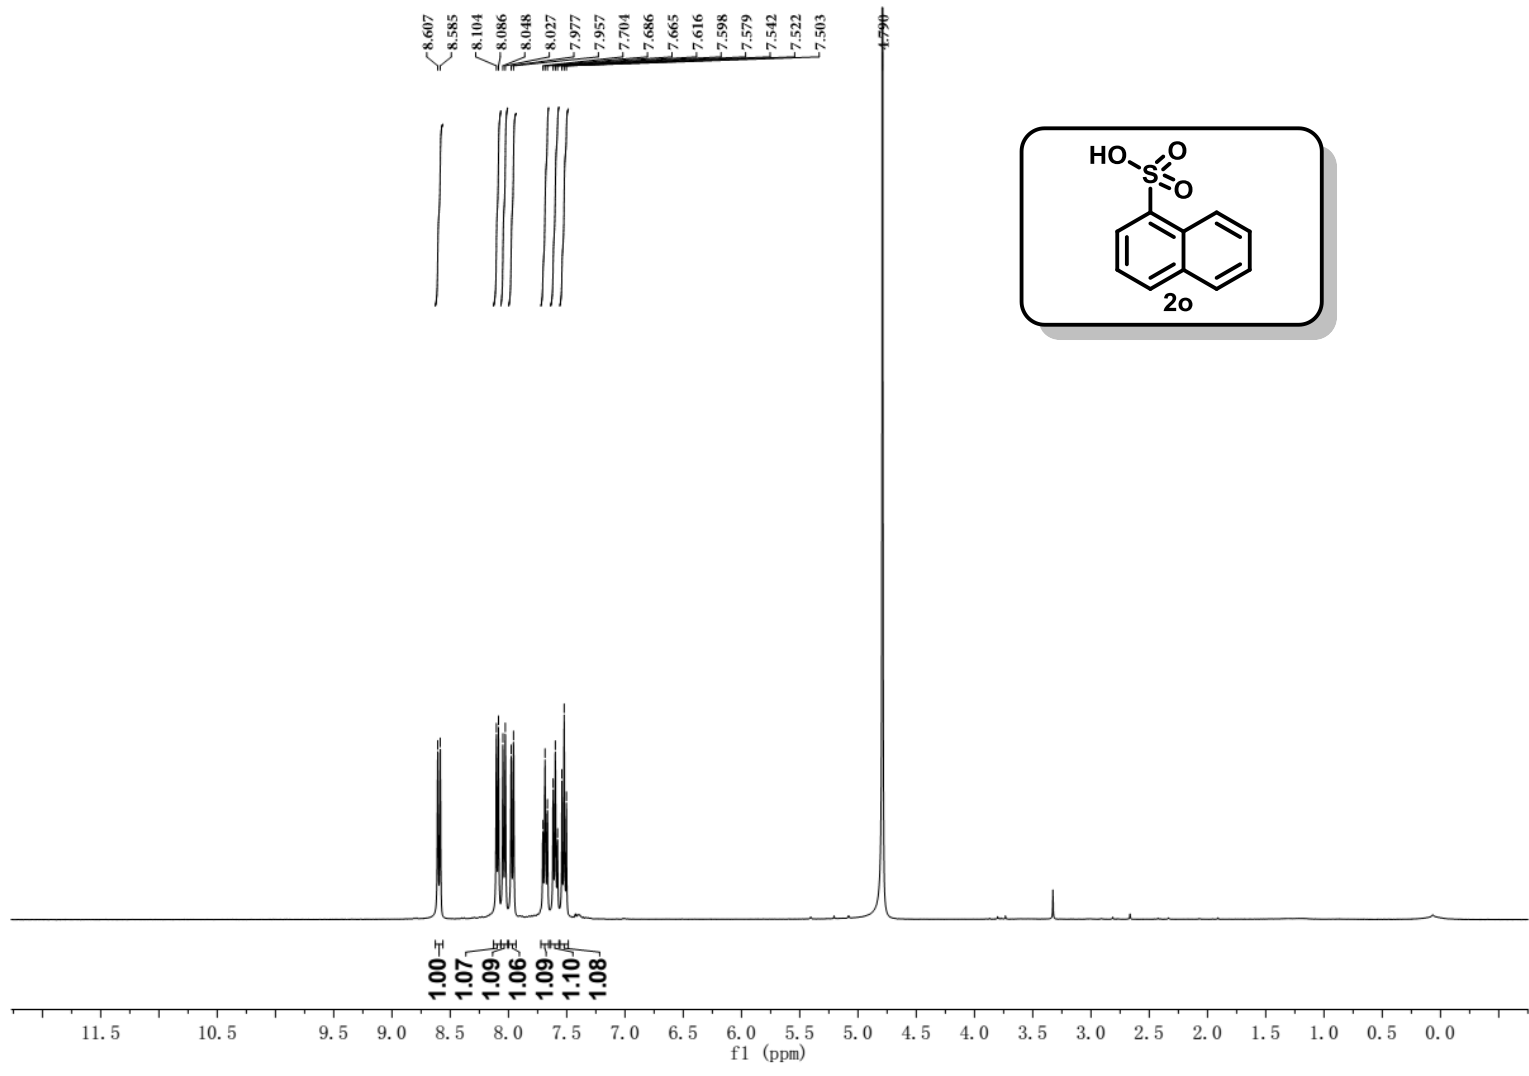

137.66  
133.90  
132.65  
128.87  
127.85  
127.71  
126.69  
126.09  
124.87  
124.57

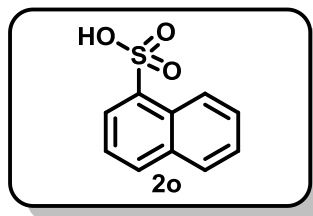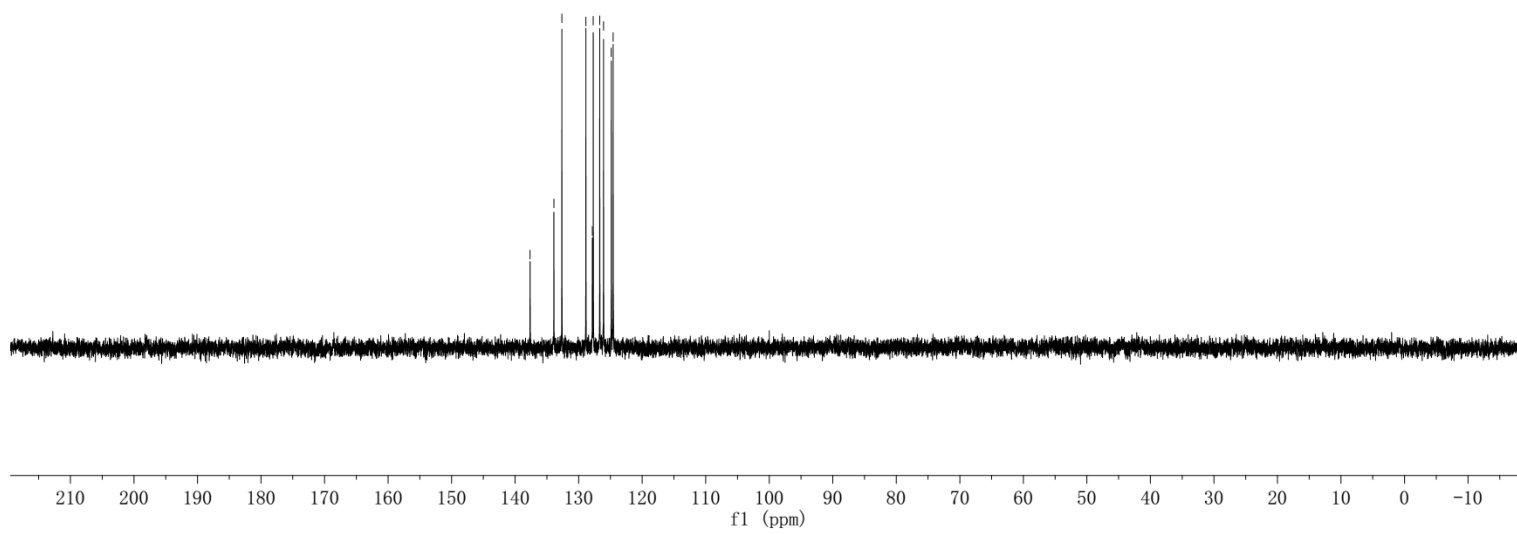



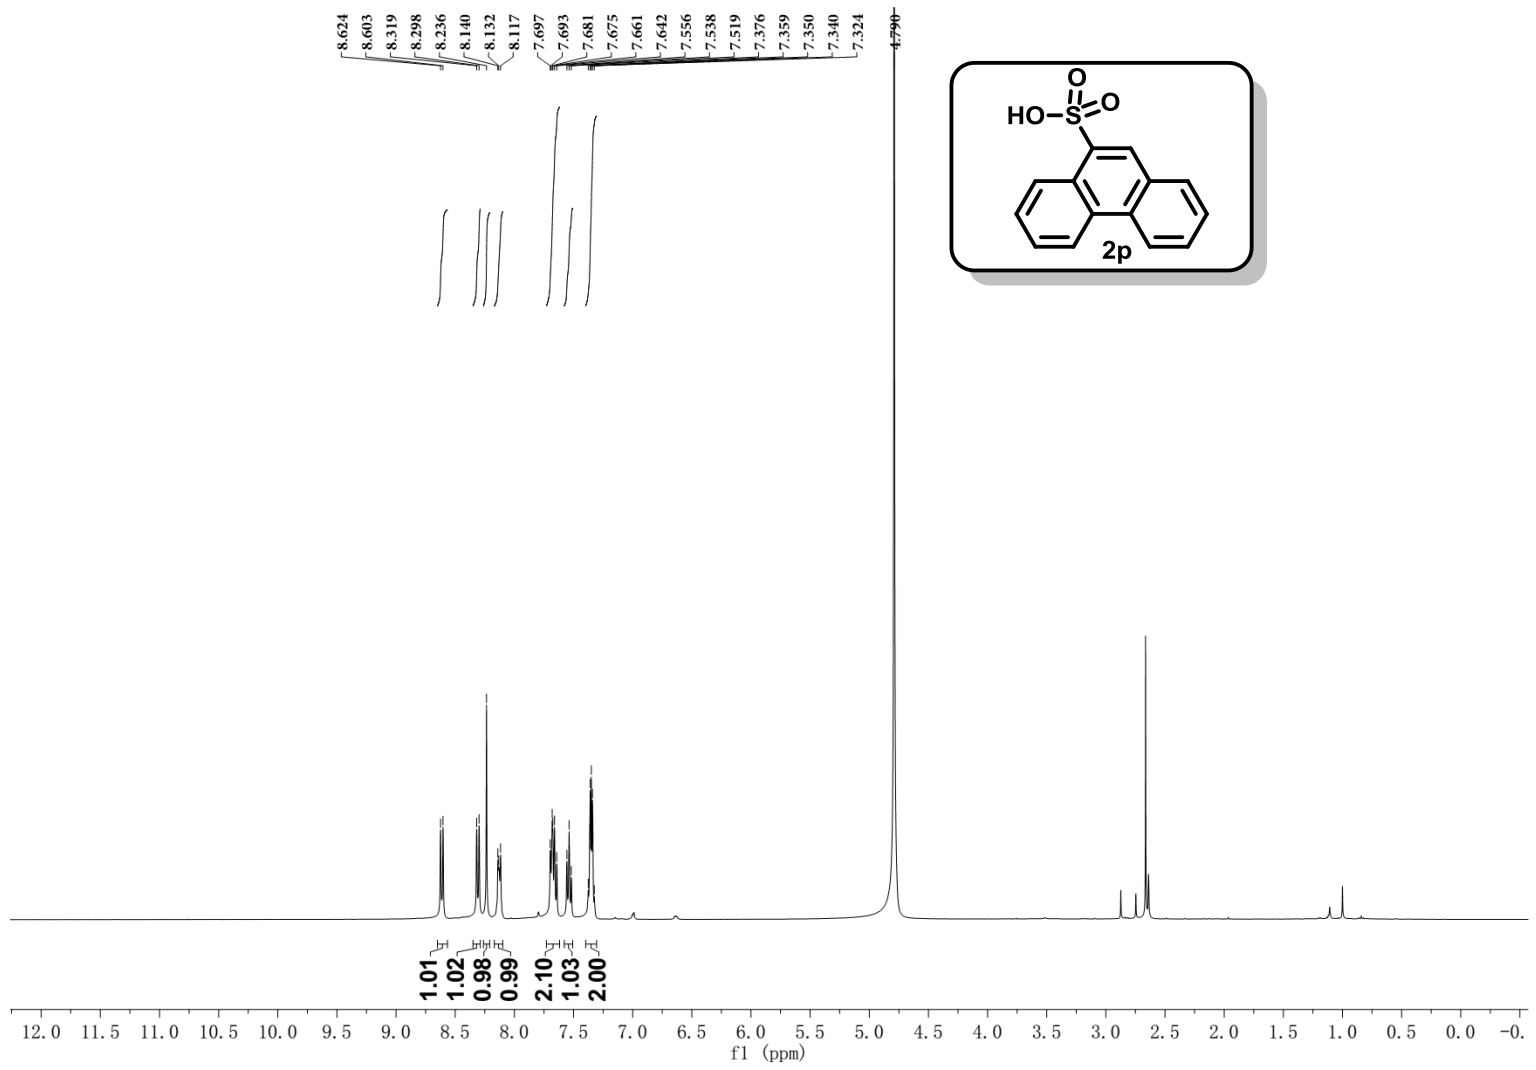

136.22  
130.58  
130.39  
129.47  
128.94  
128.45  
127.75  
127.11  
127.00  
126.98  
126.00  
125.82  
122.89  
121.90

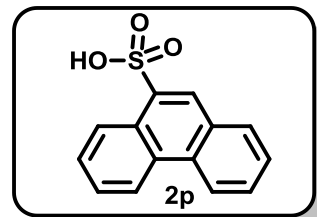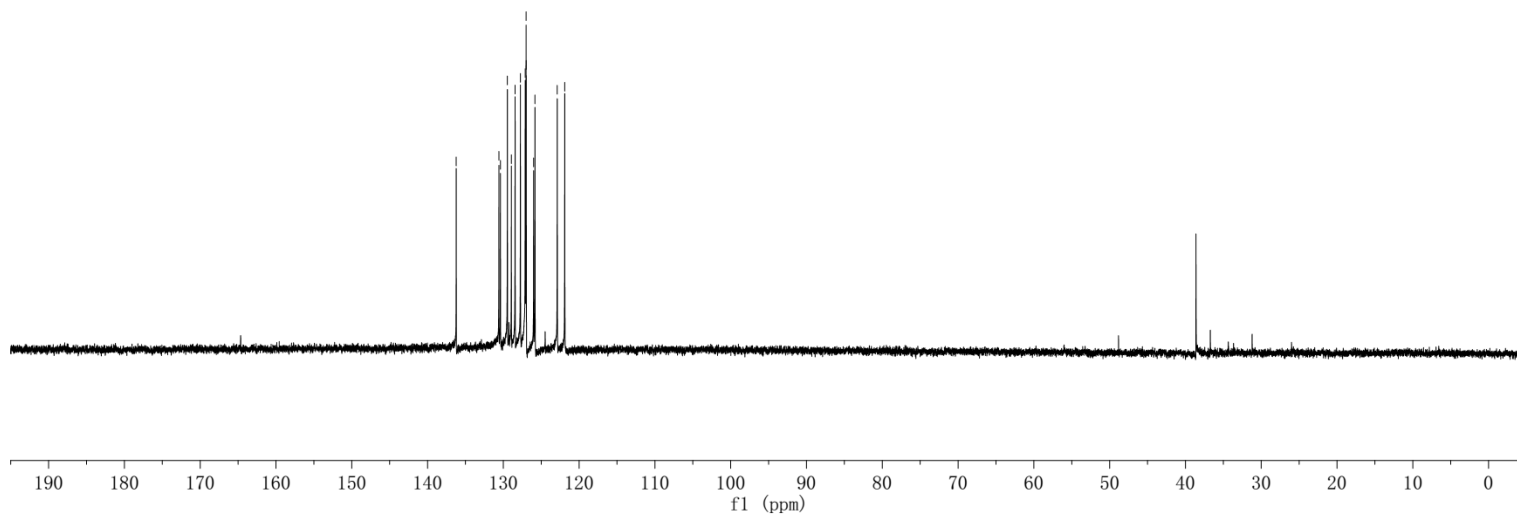

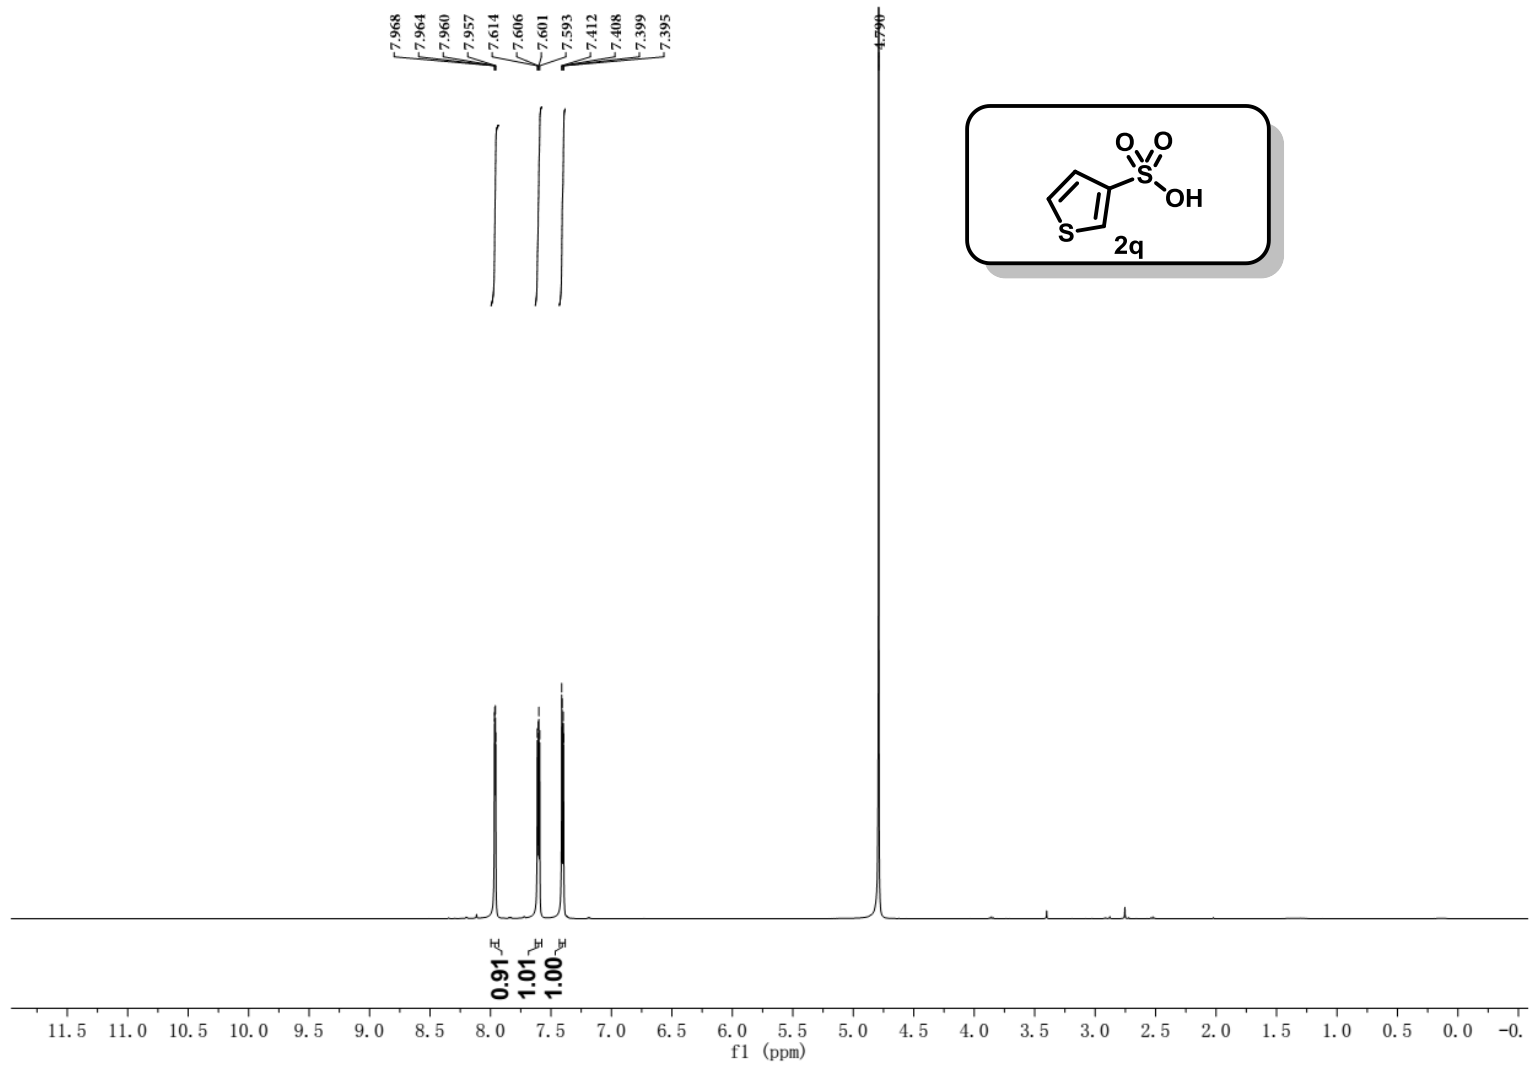

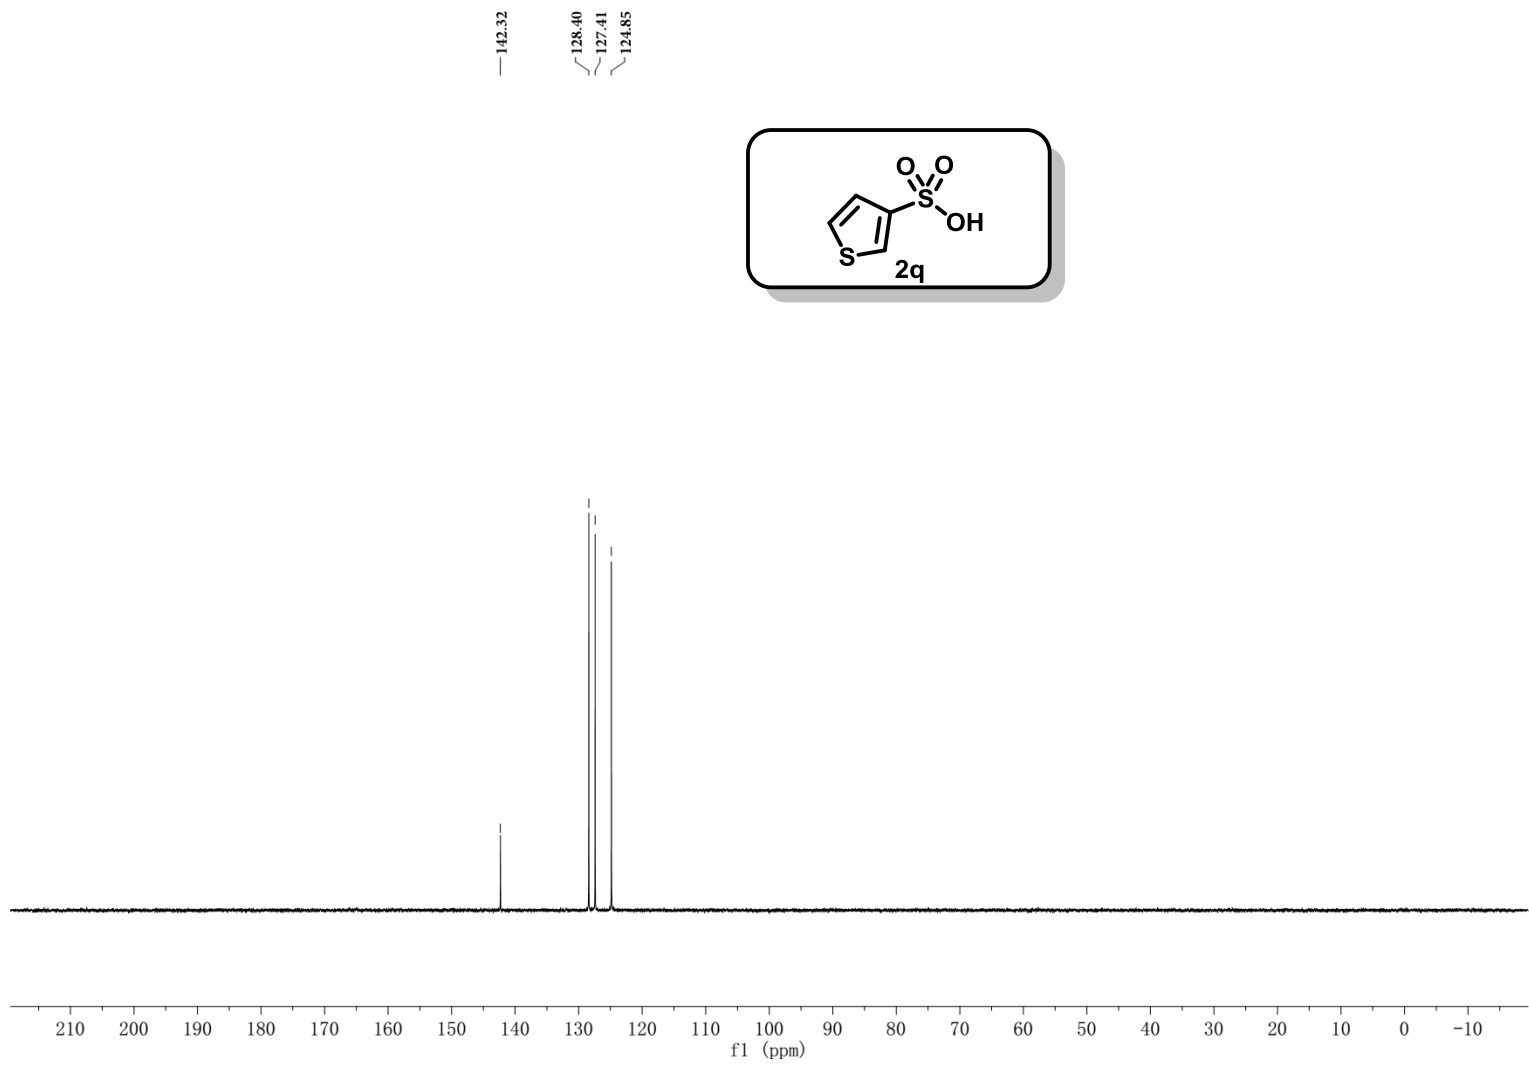

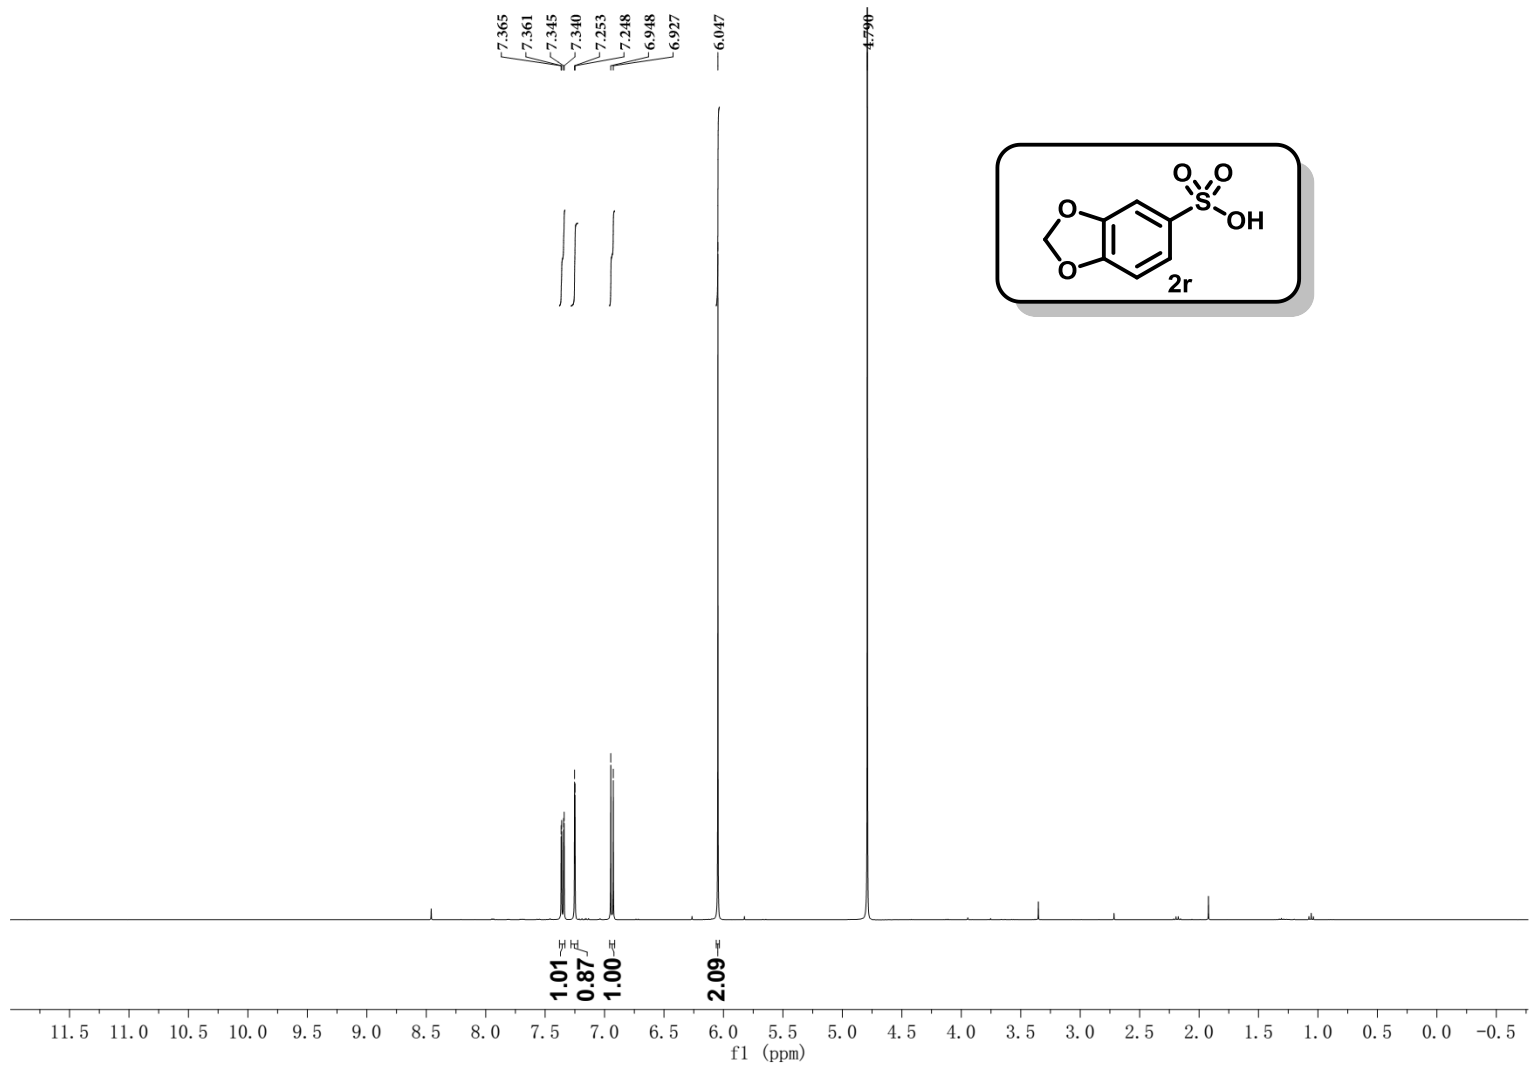

149.73  
147.46  
136.09  
120.42  
108.24  
106.02  
102.08

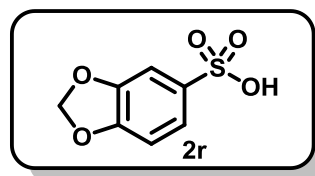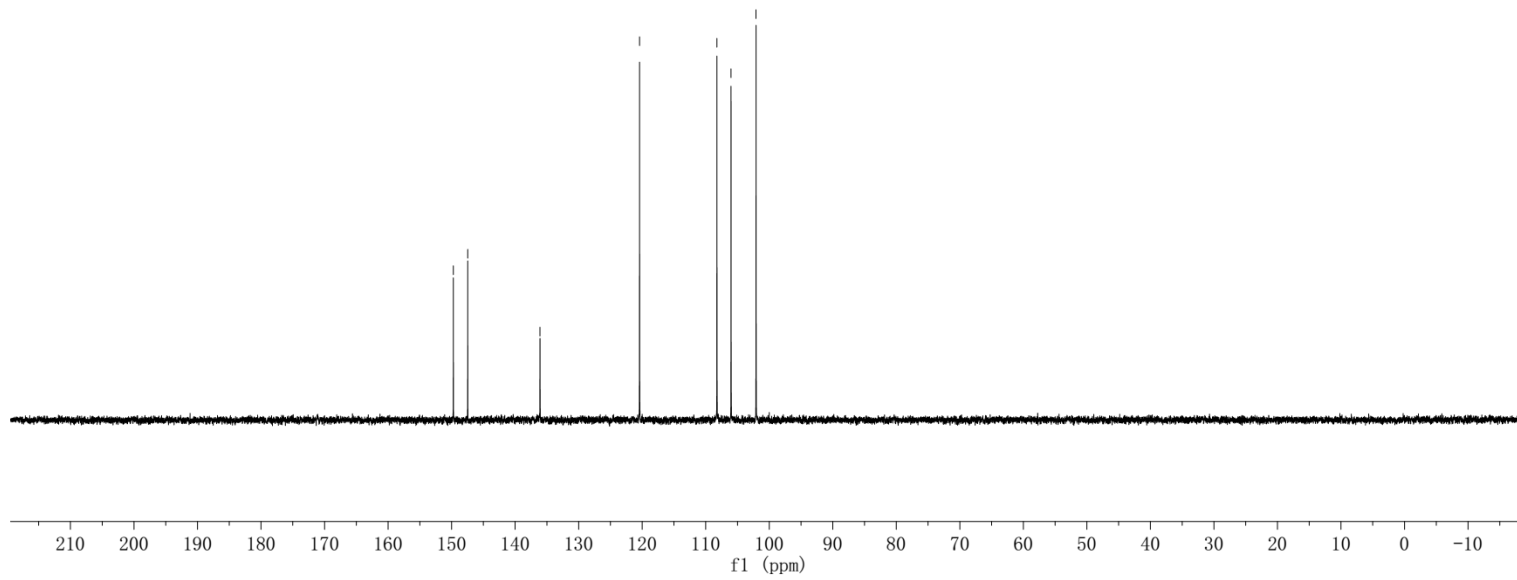

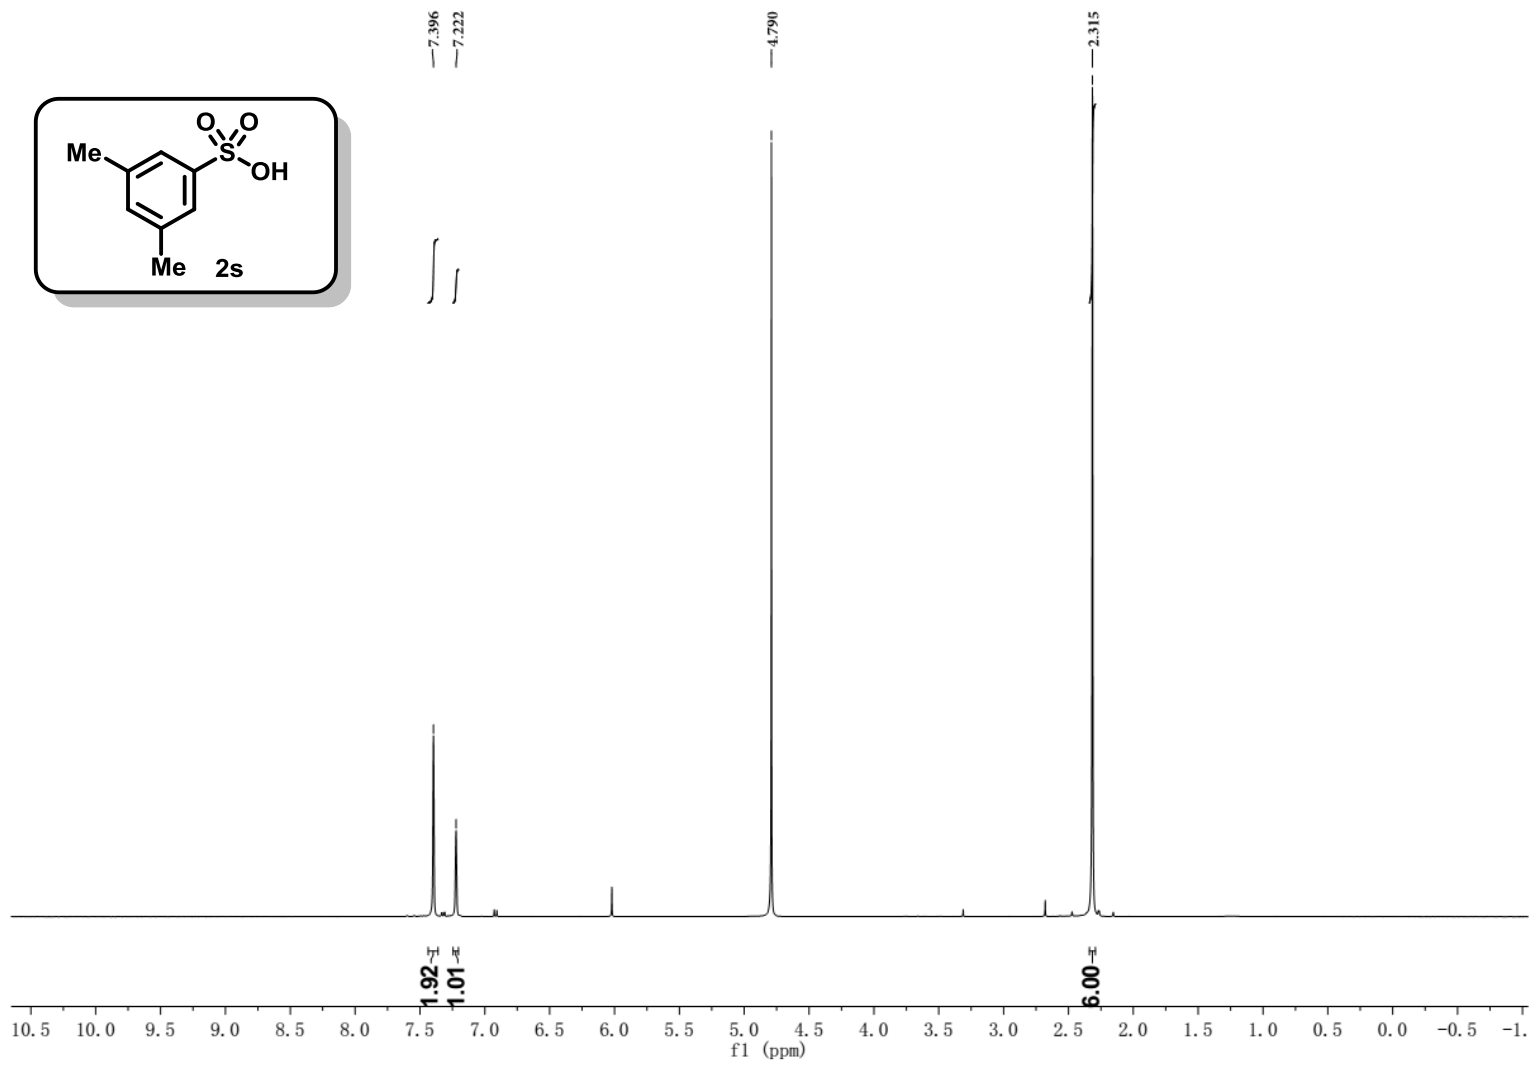

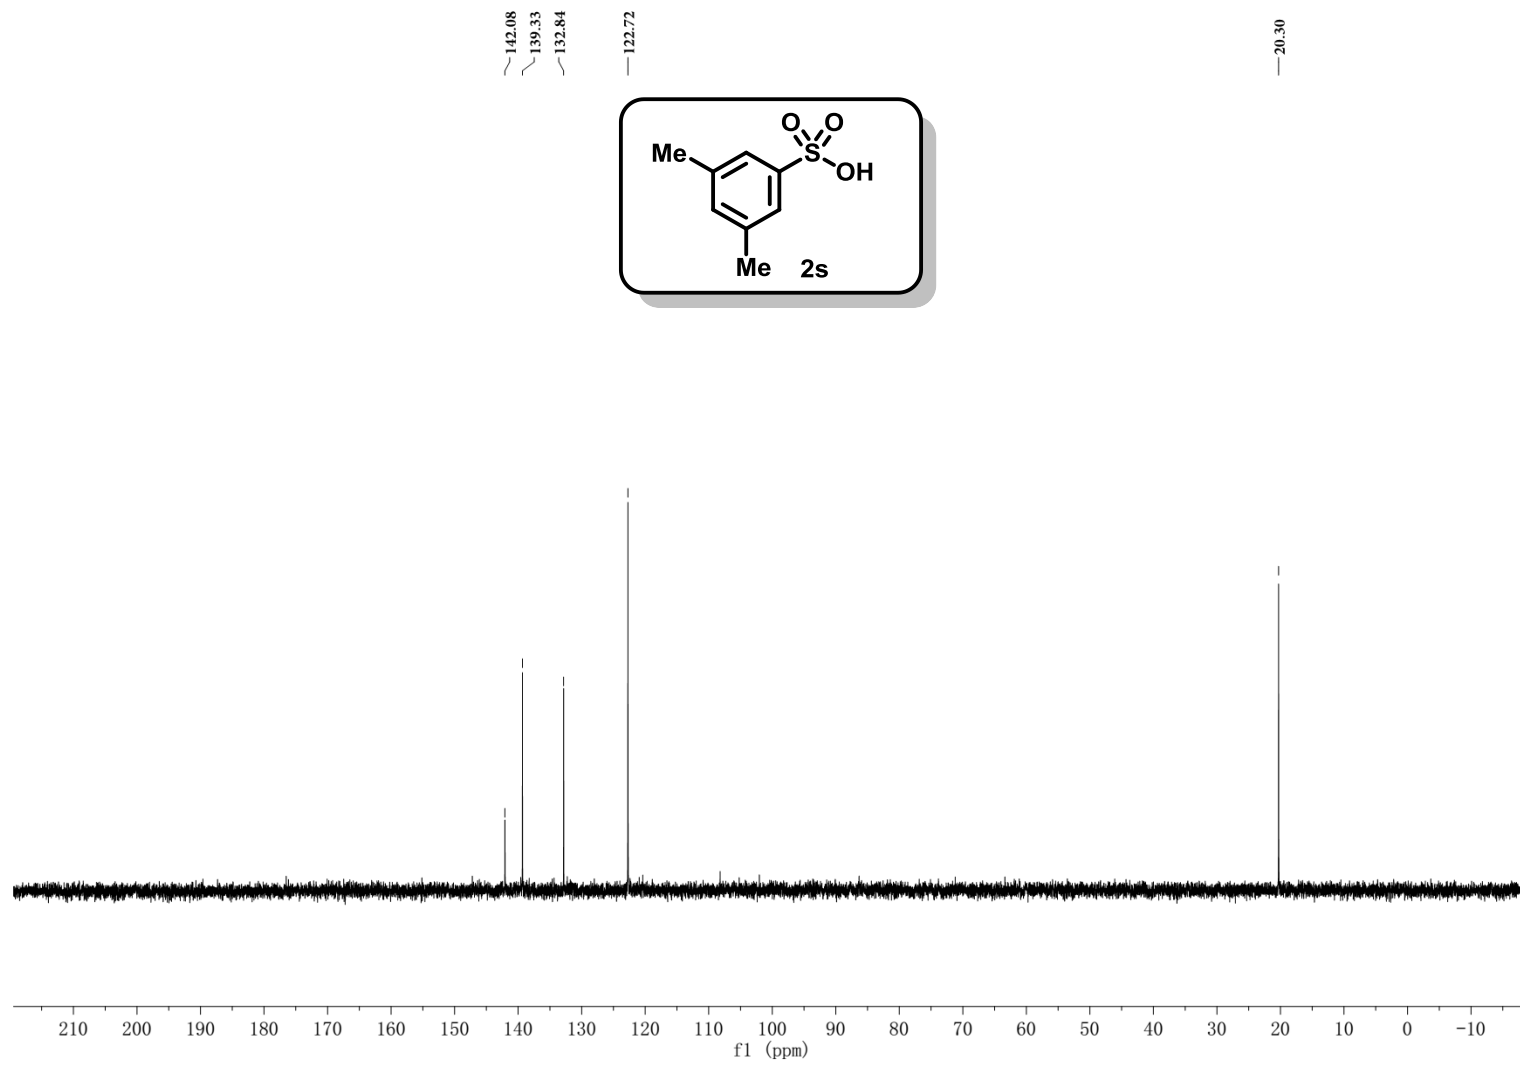



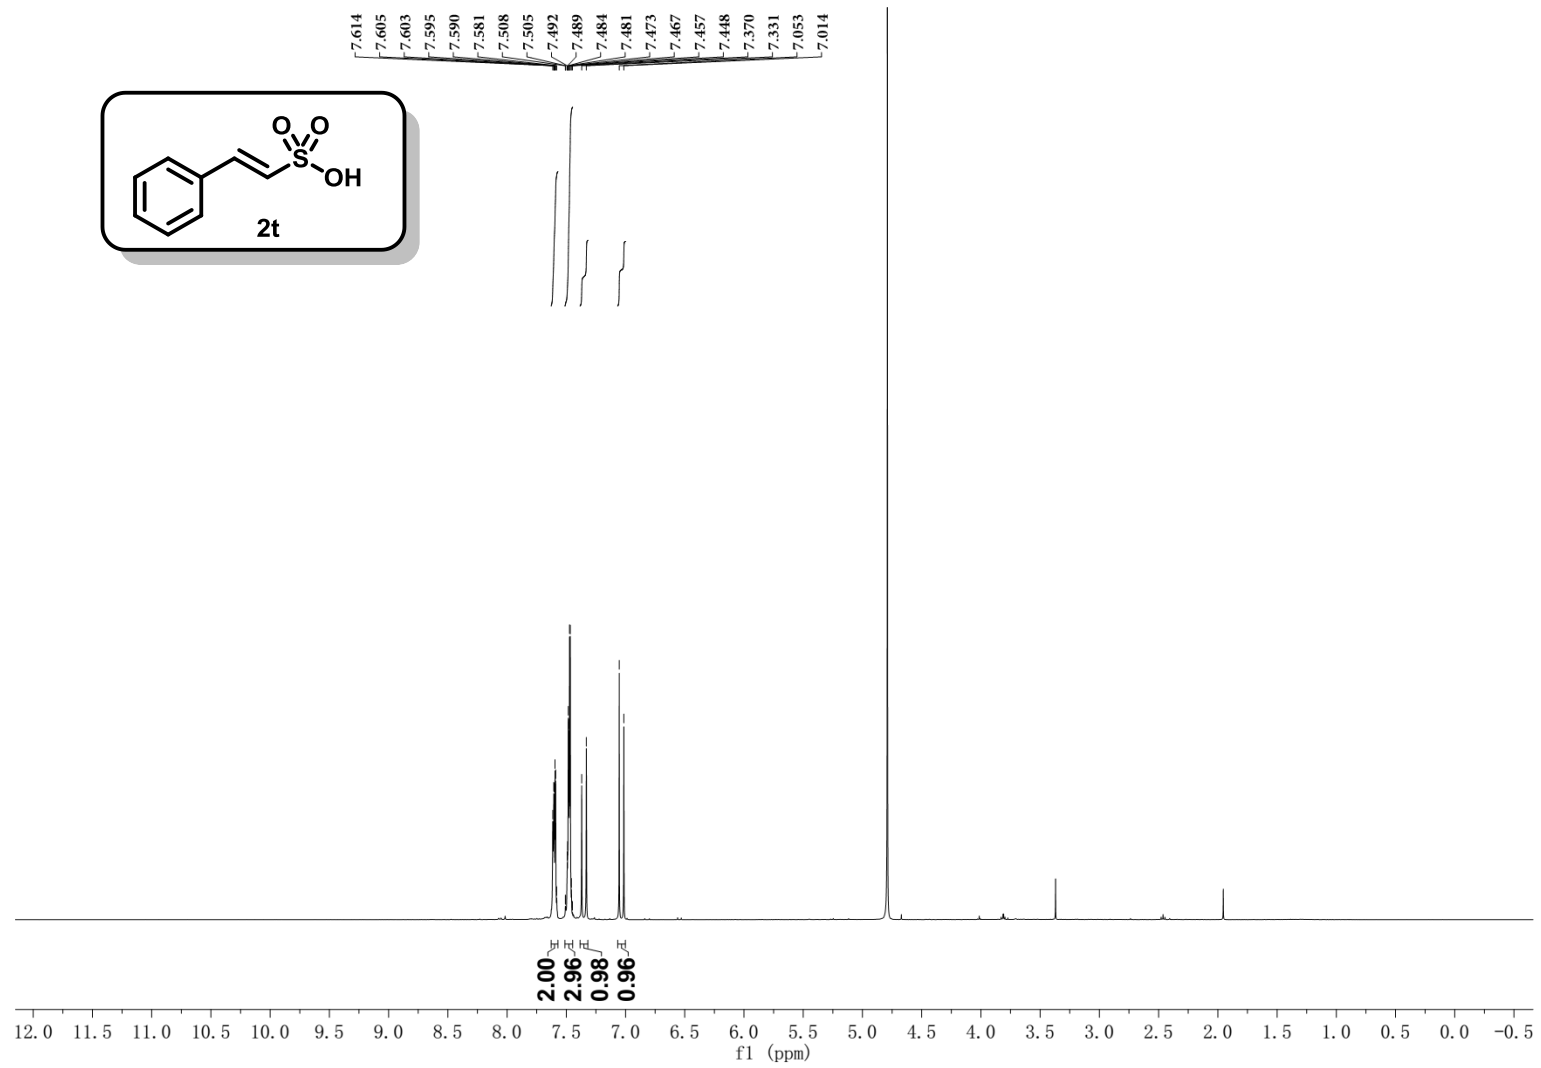

136.92  
133.45  
130.19  
129.11  
127.90  
127.65

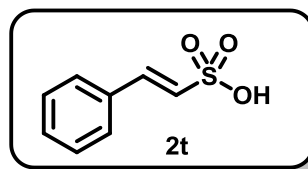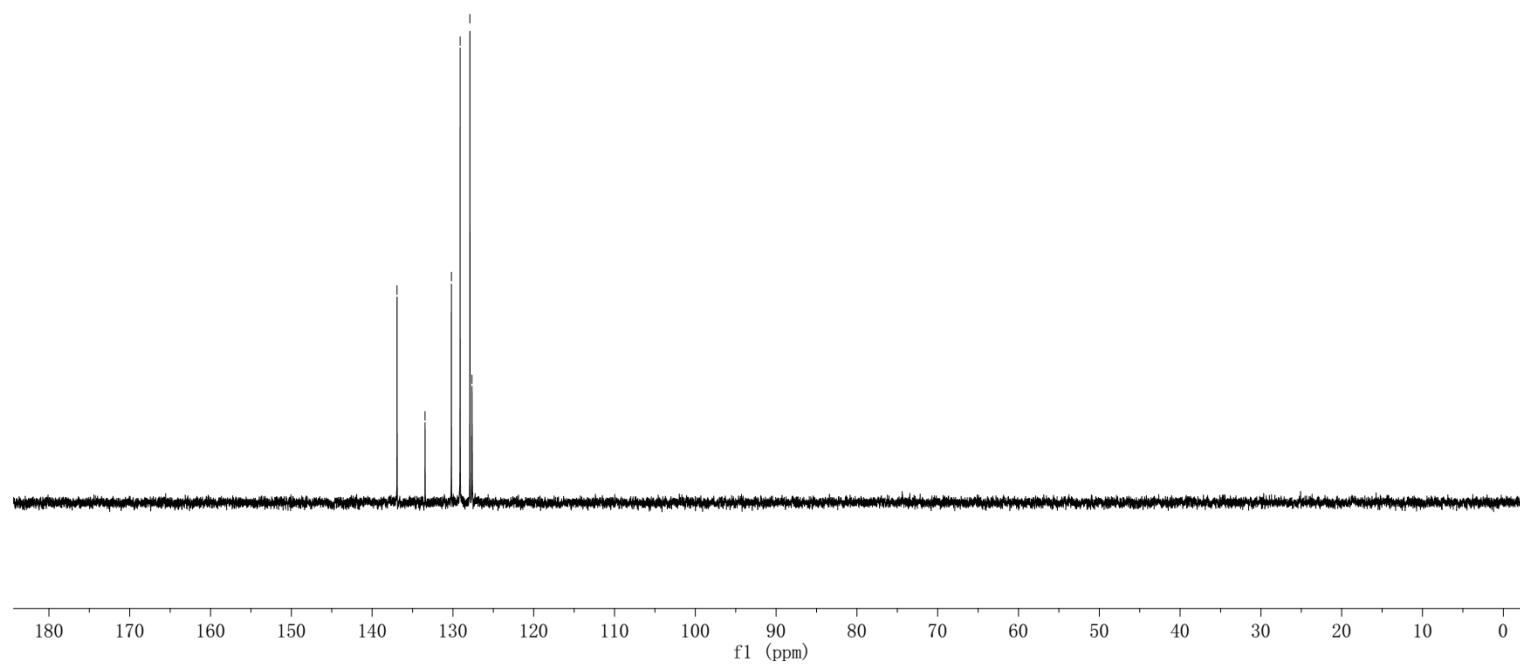

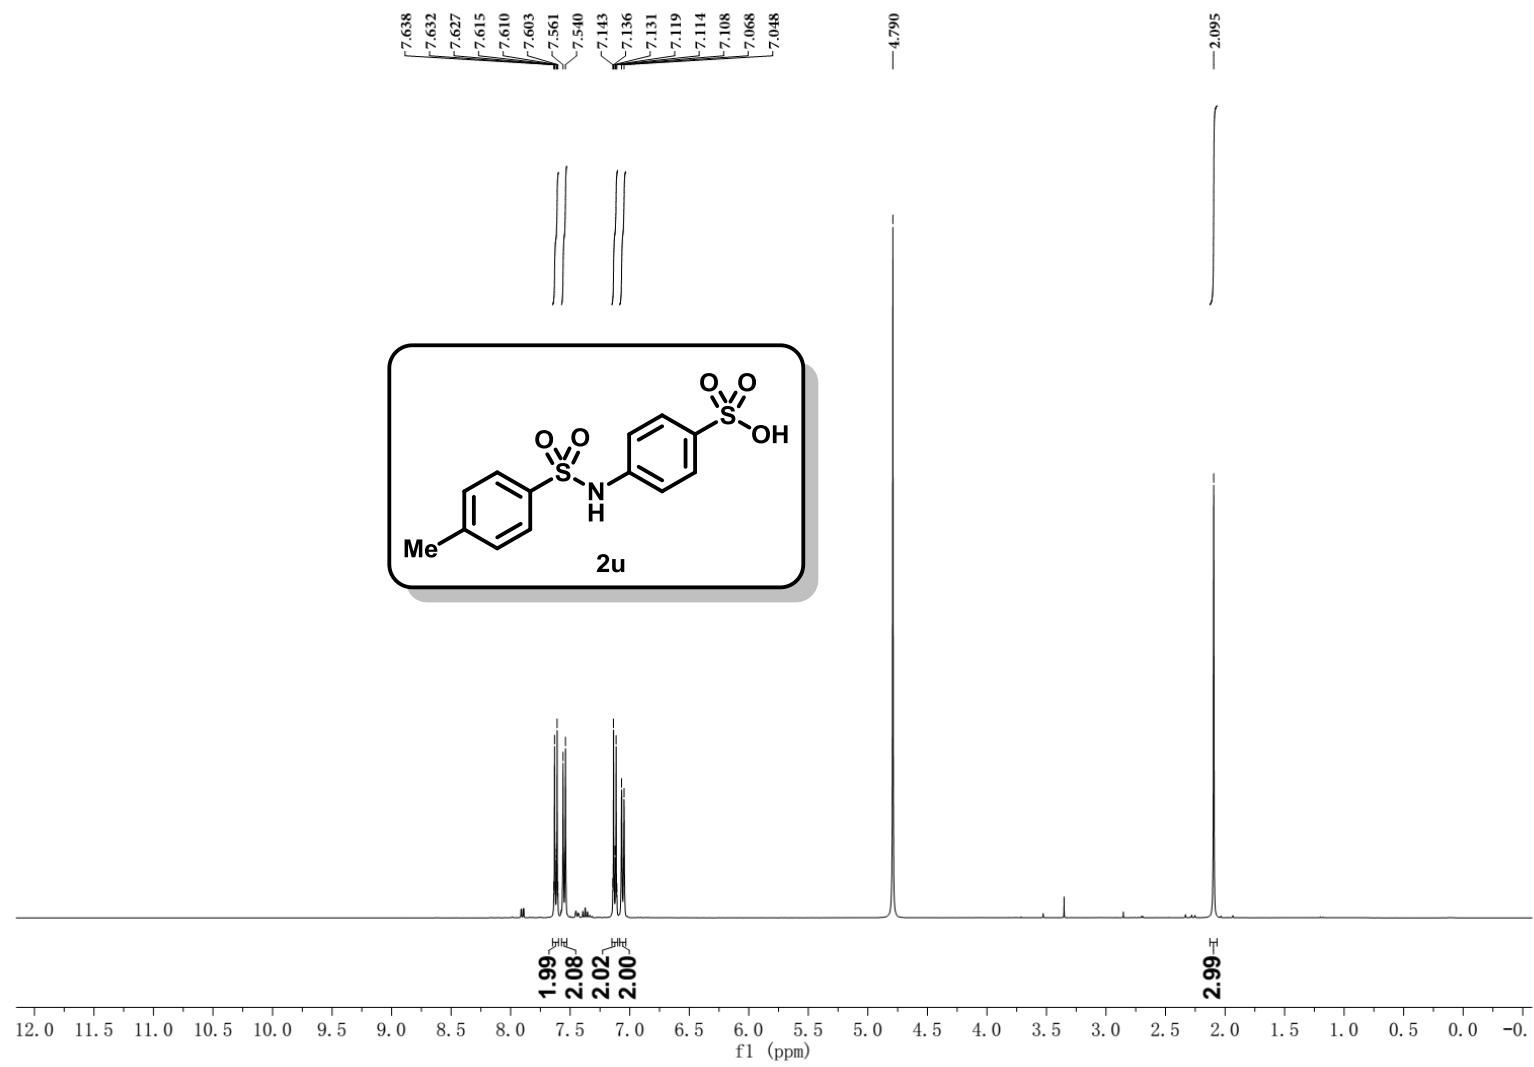

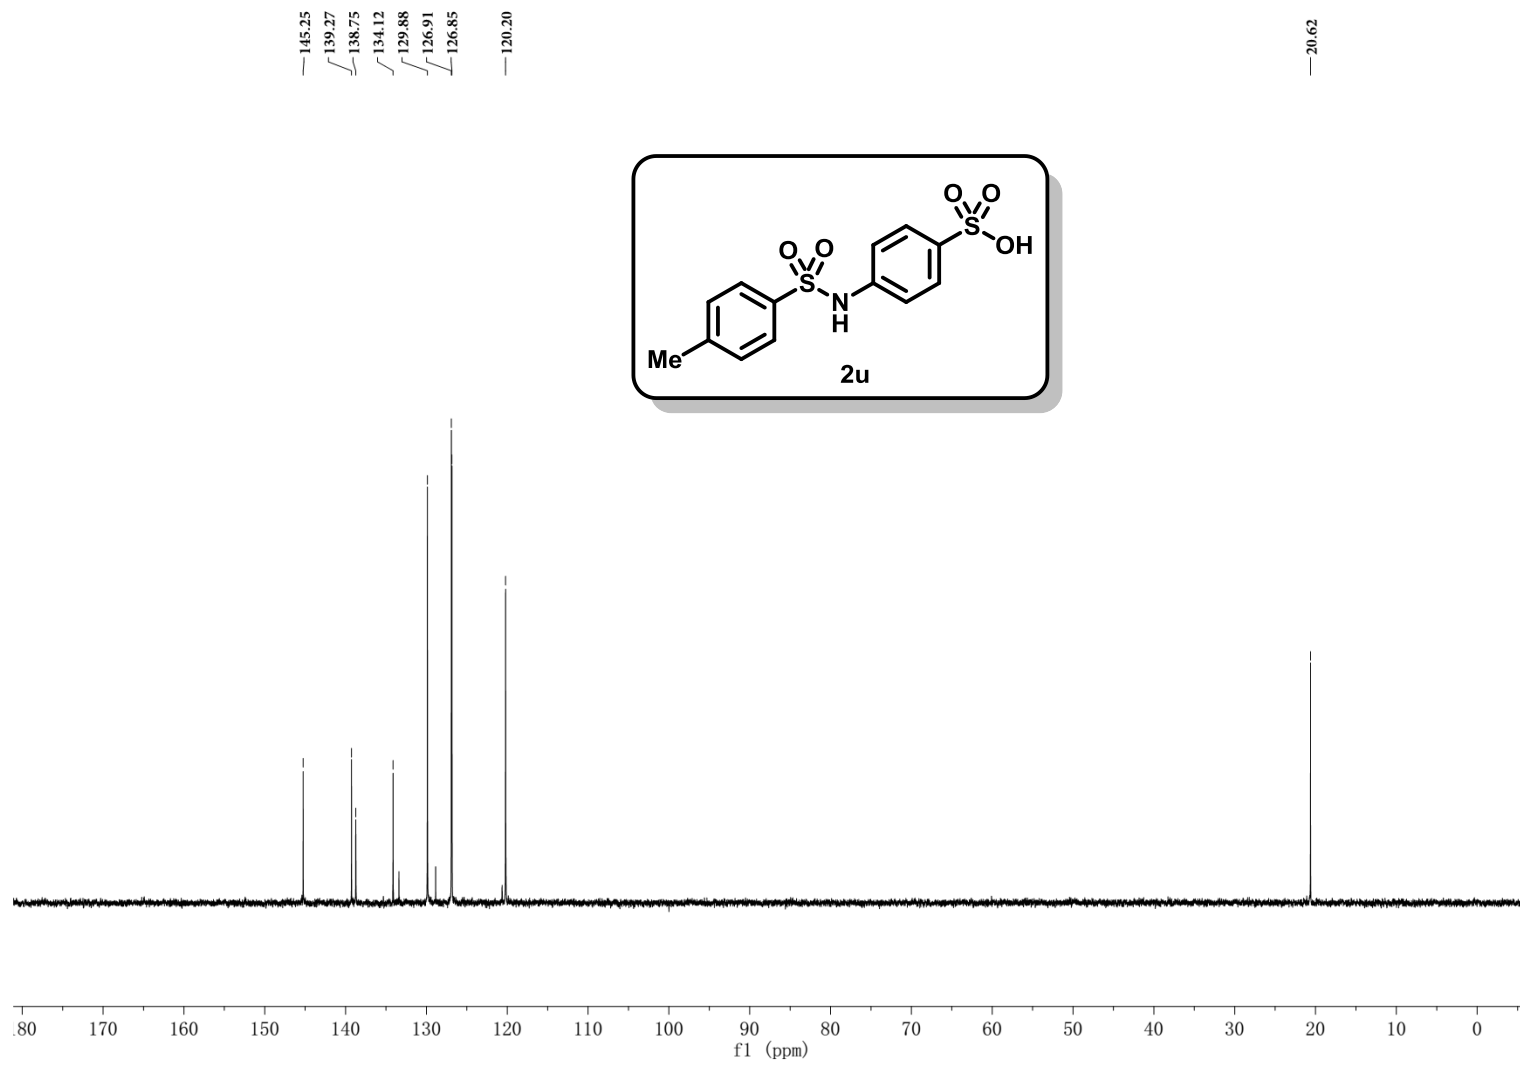

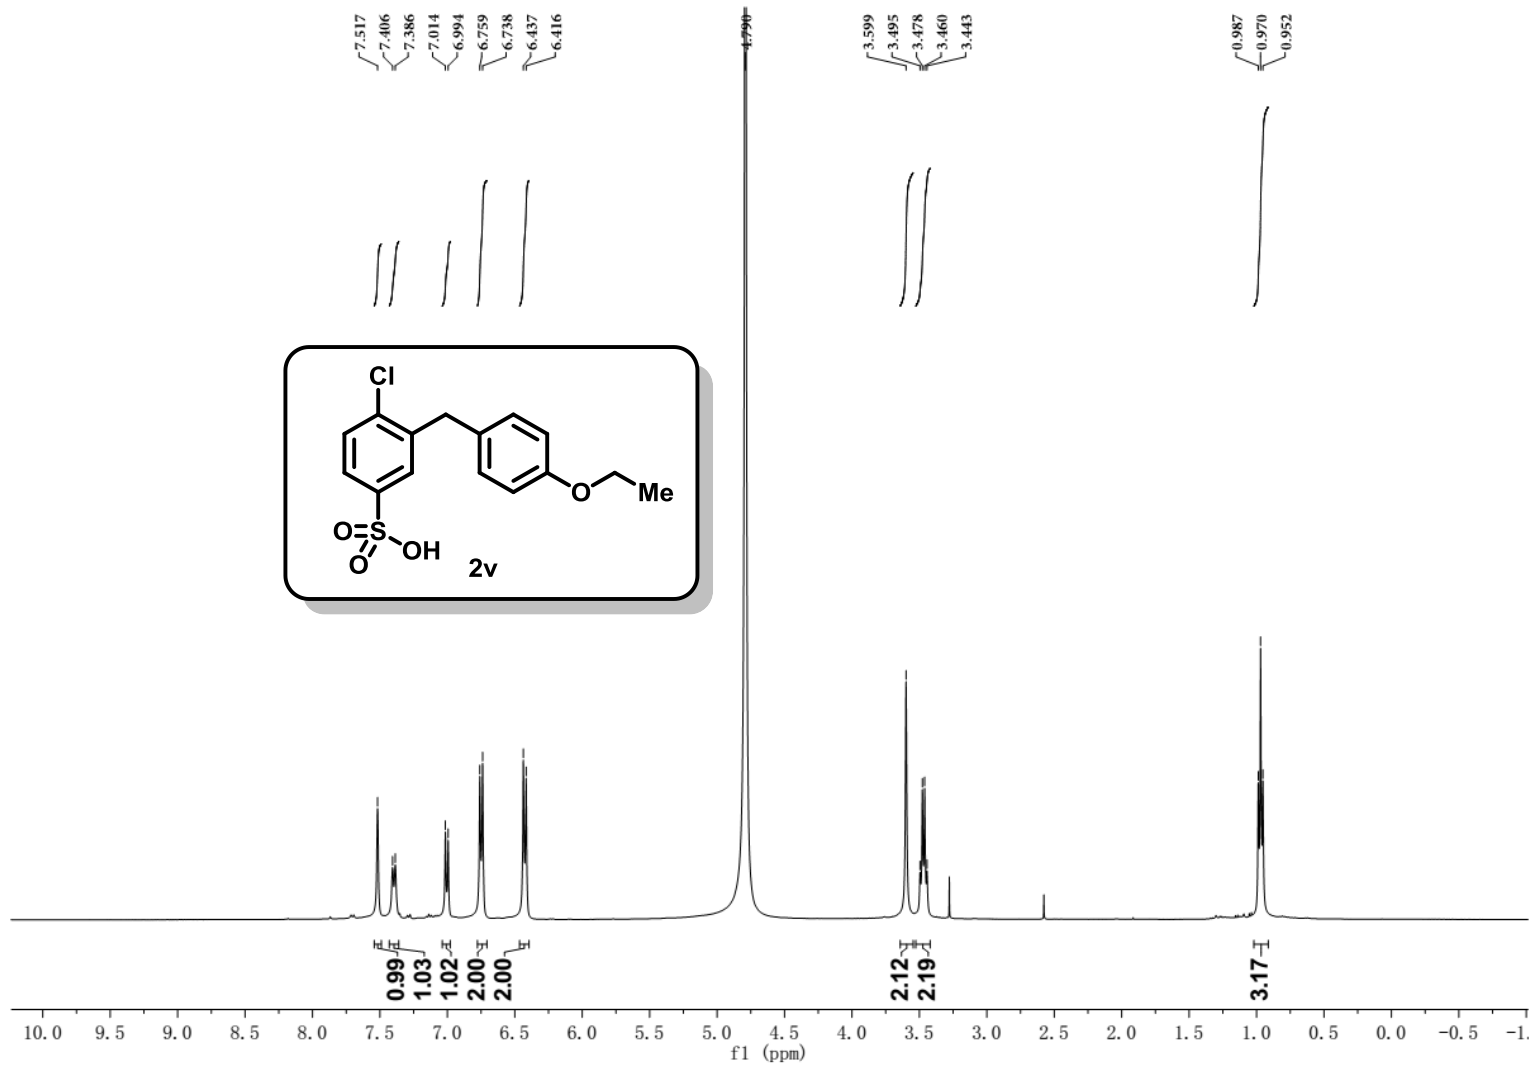

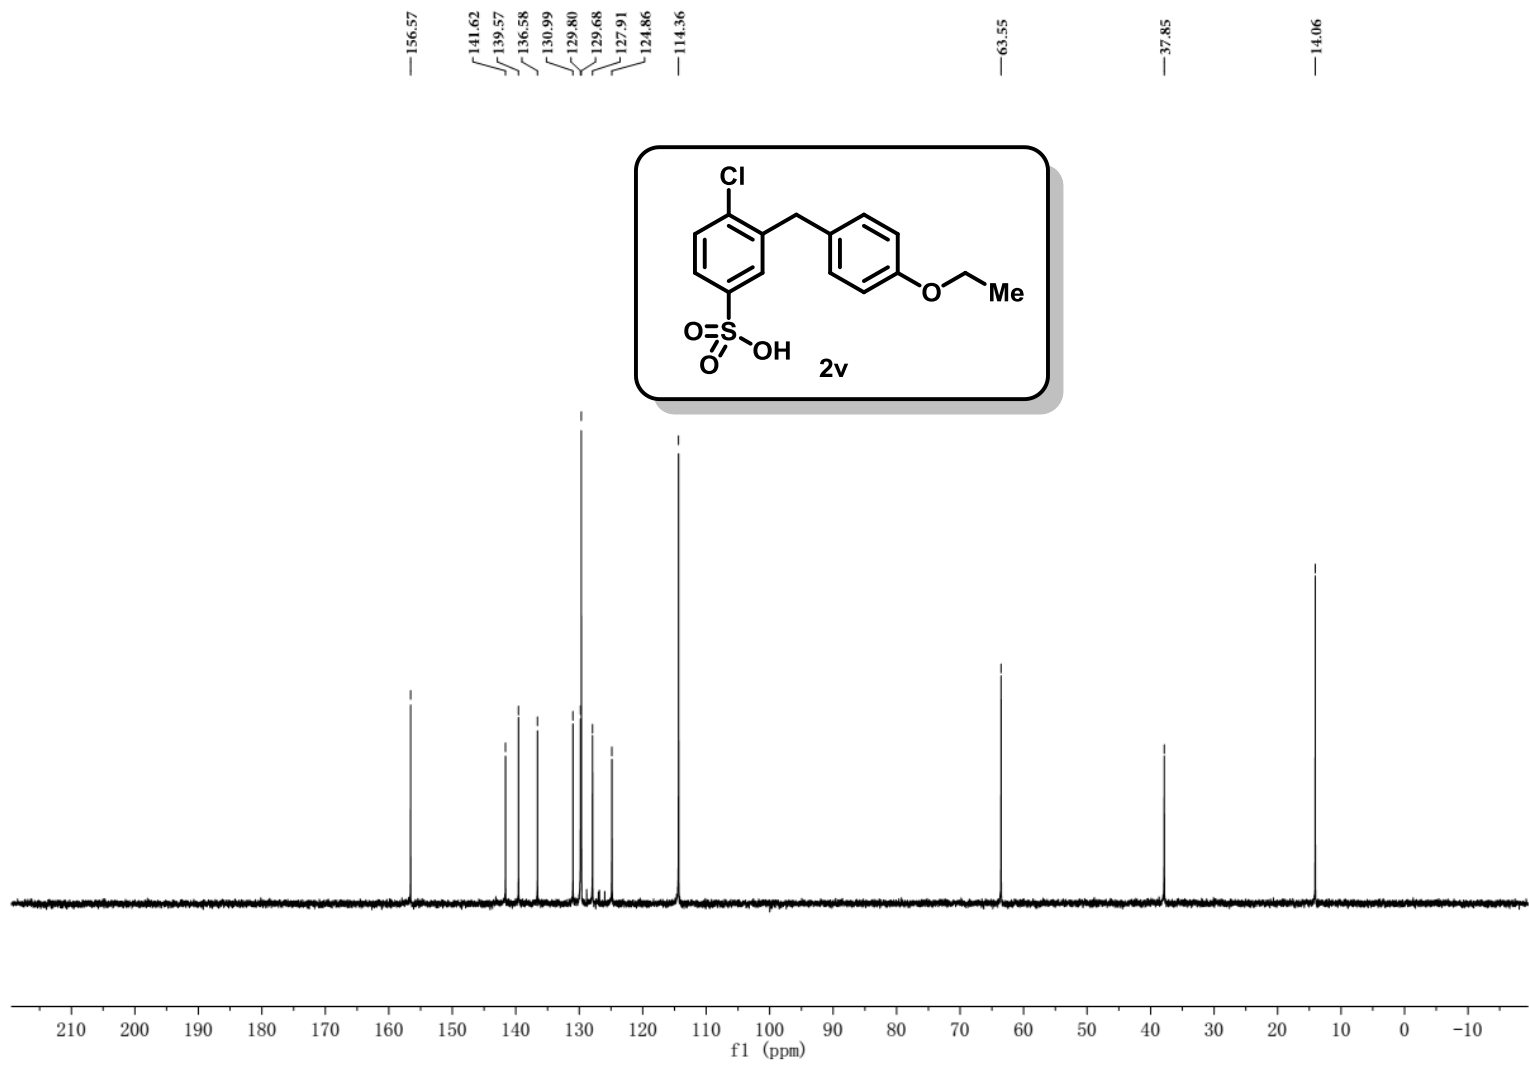

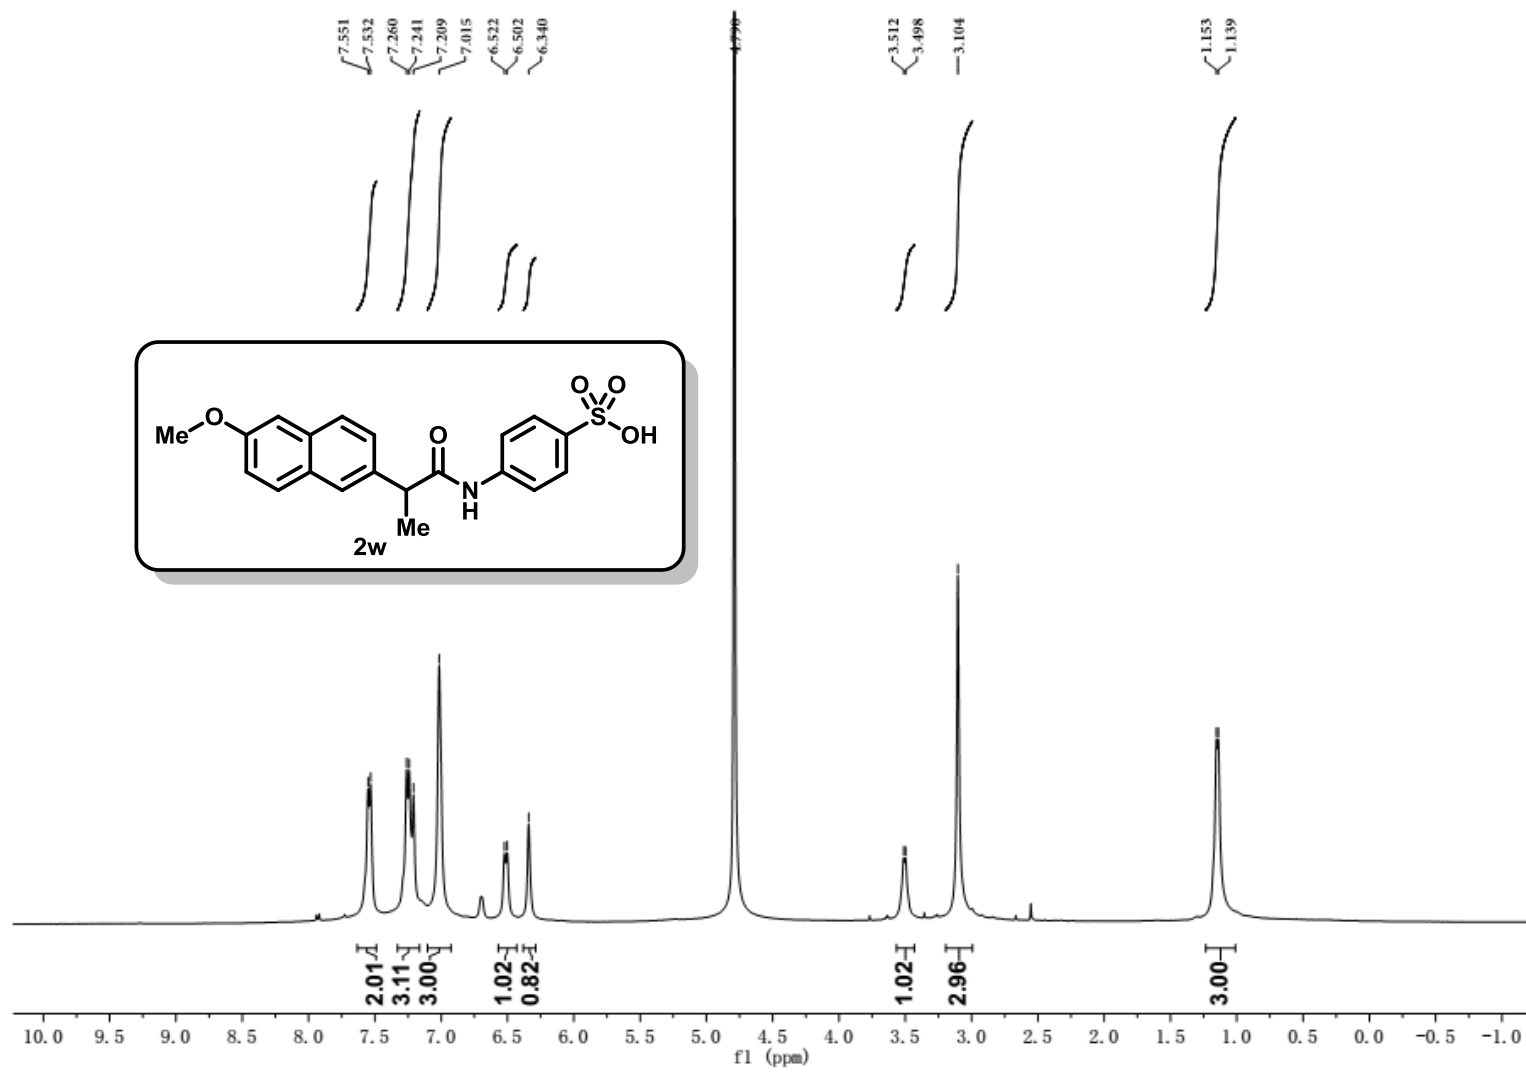

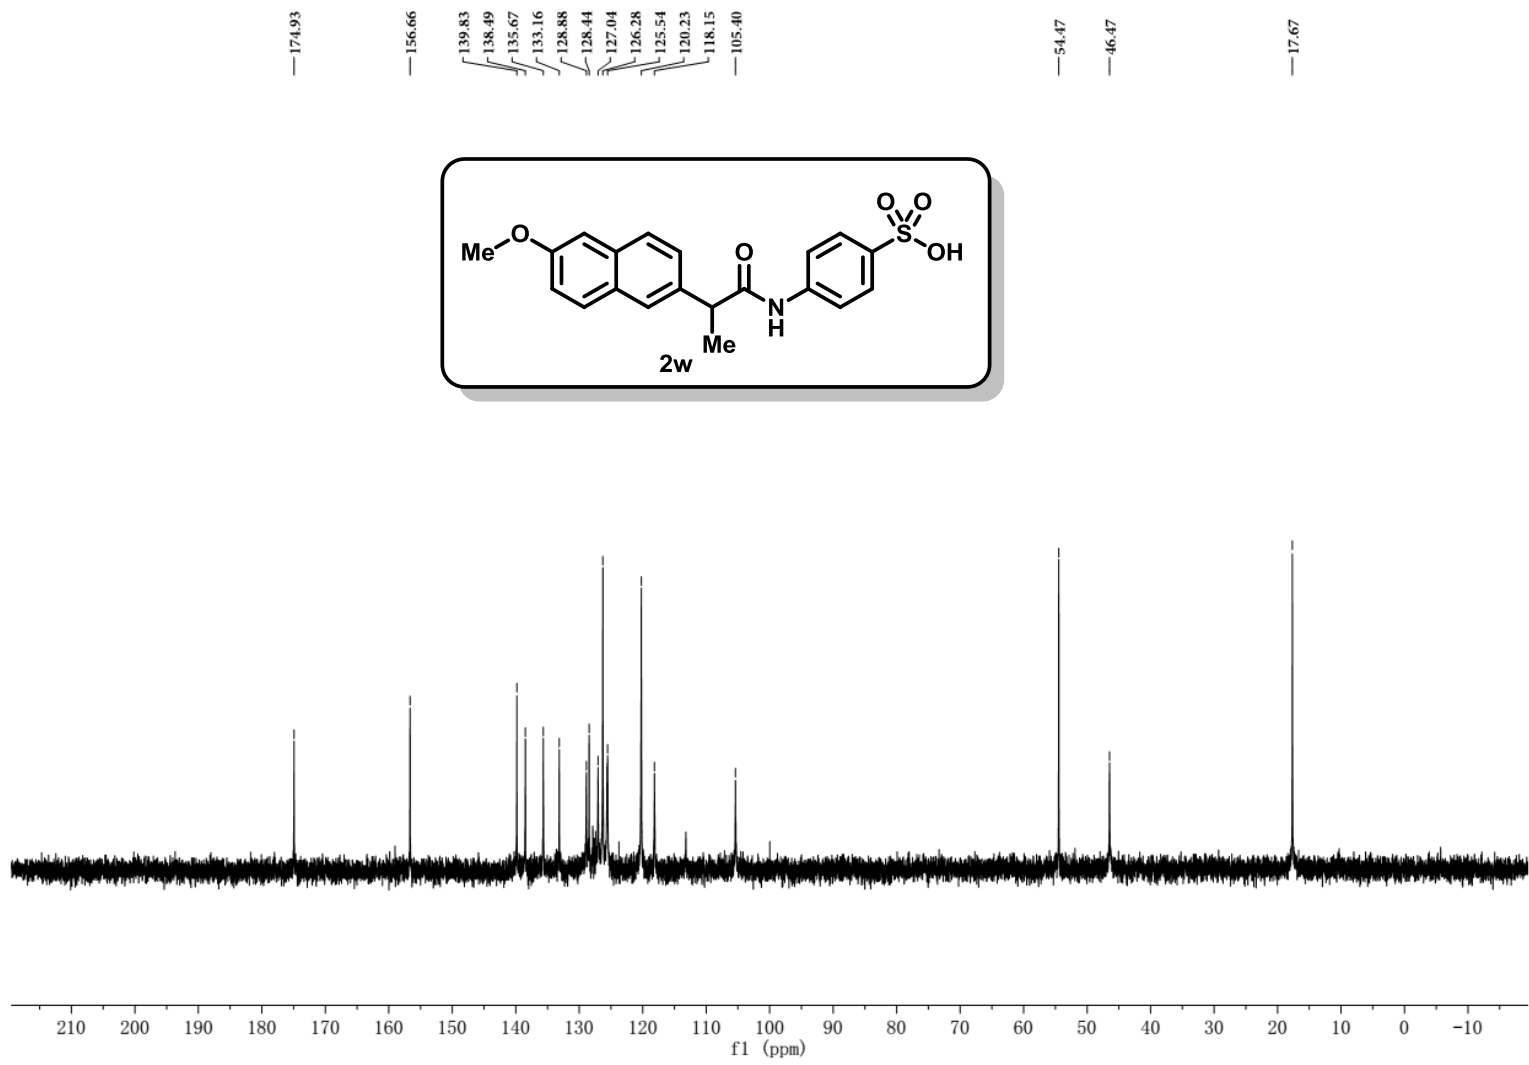



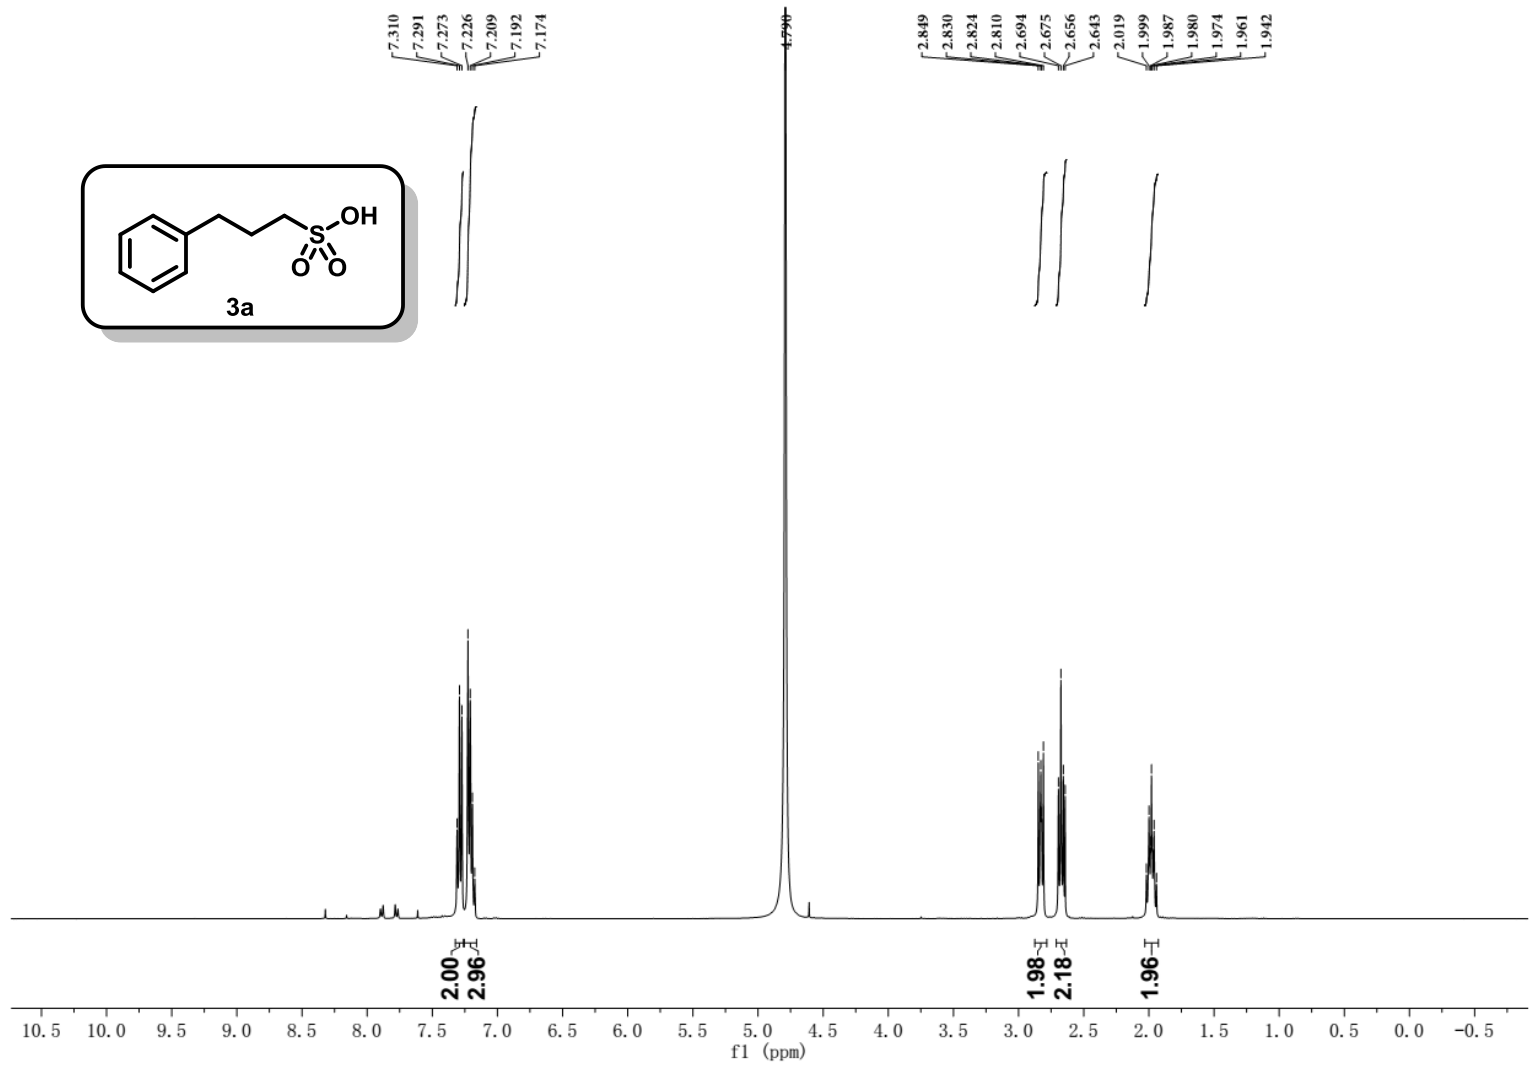

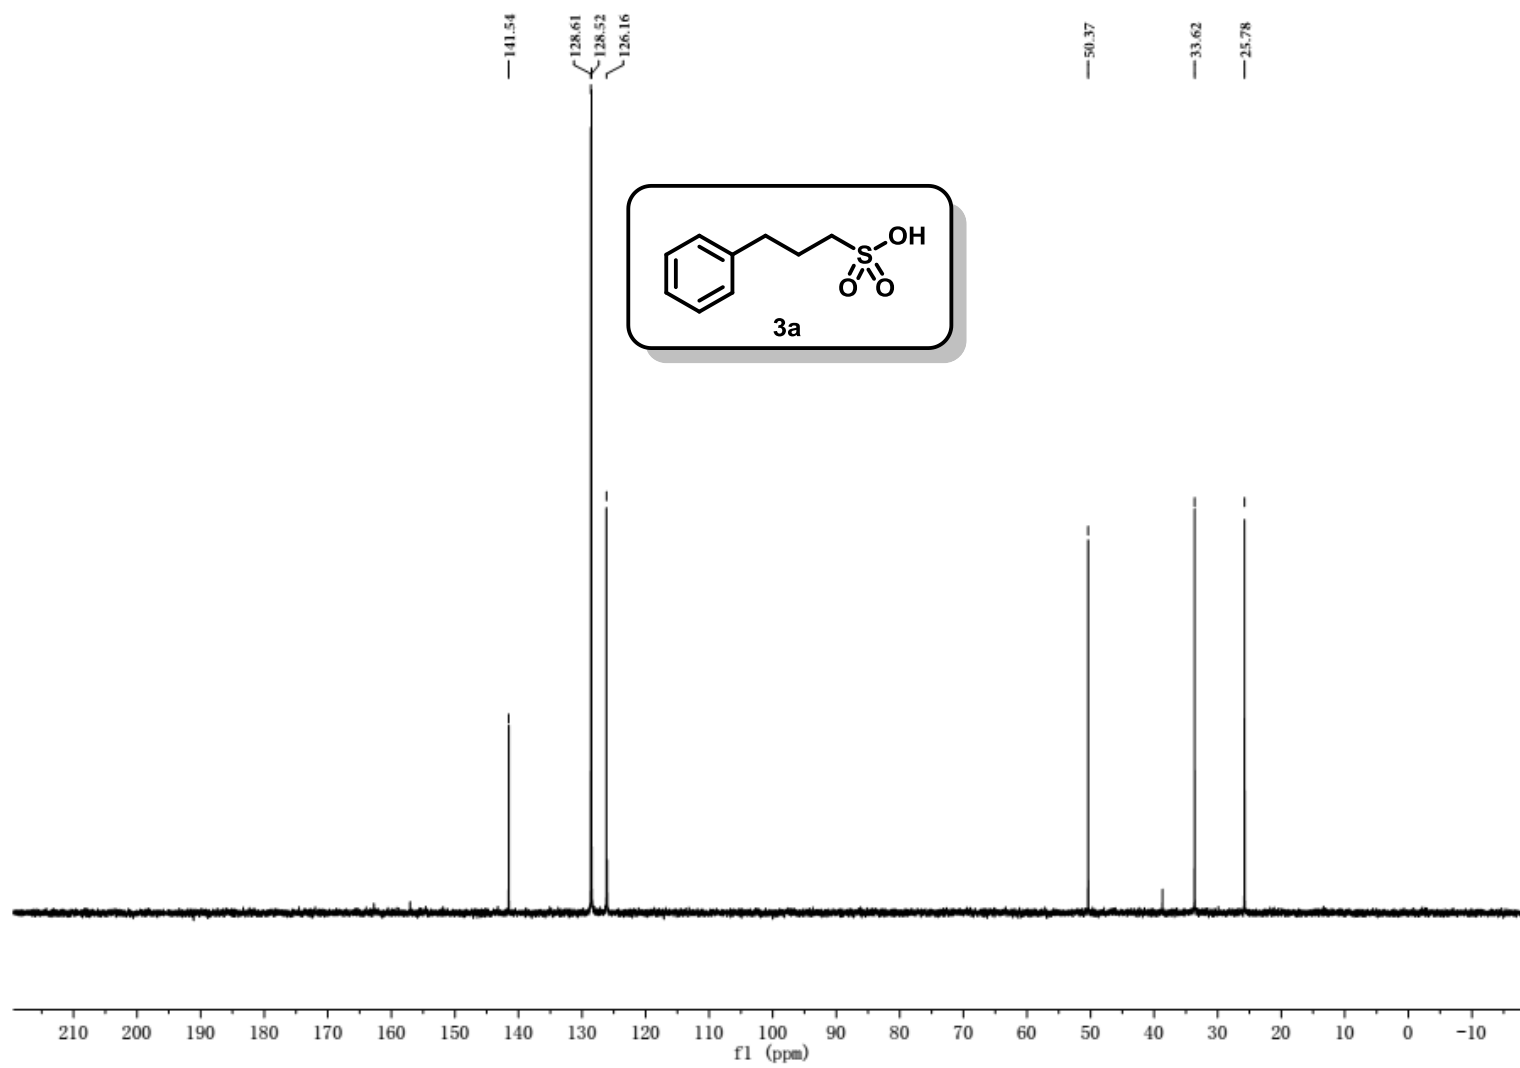

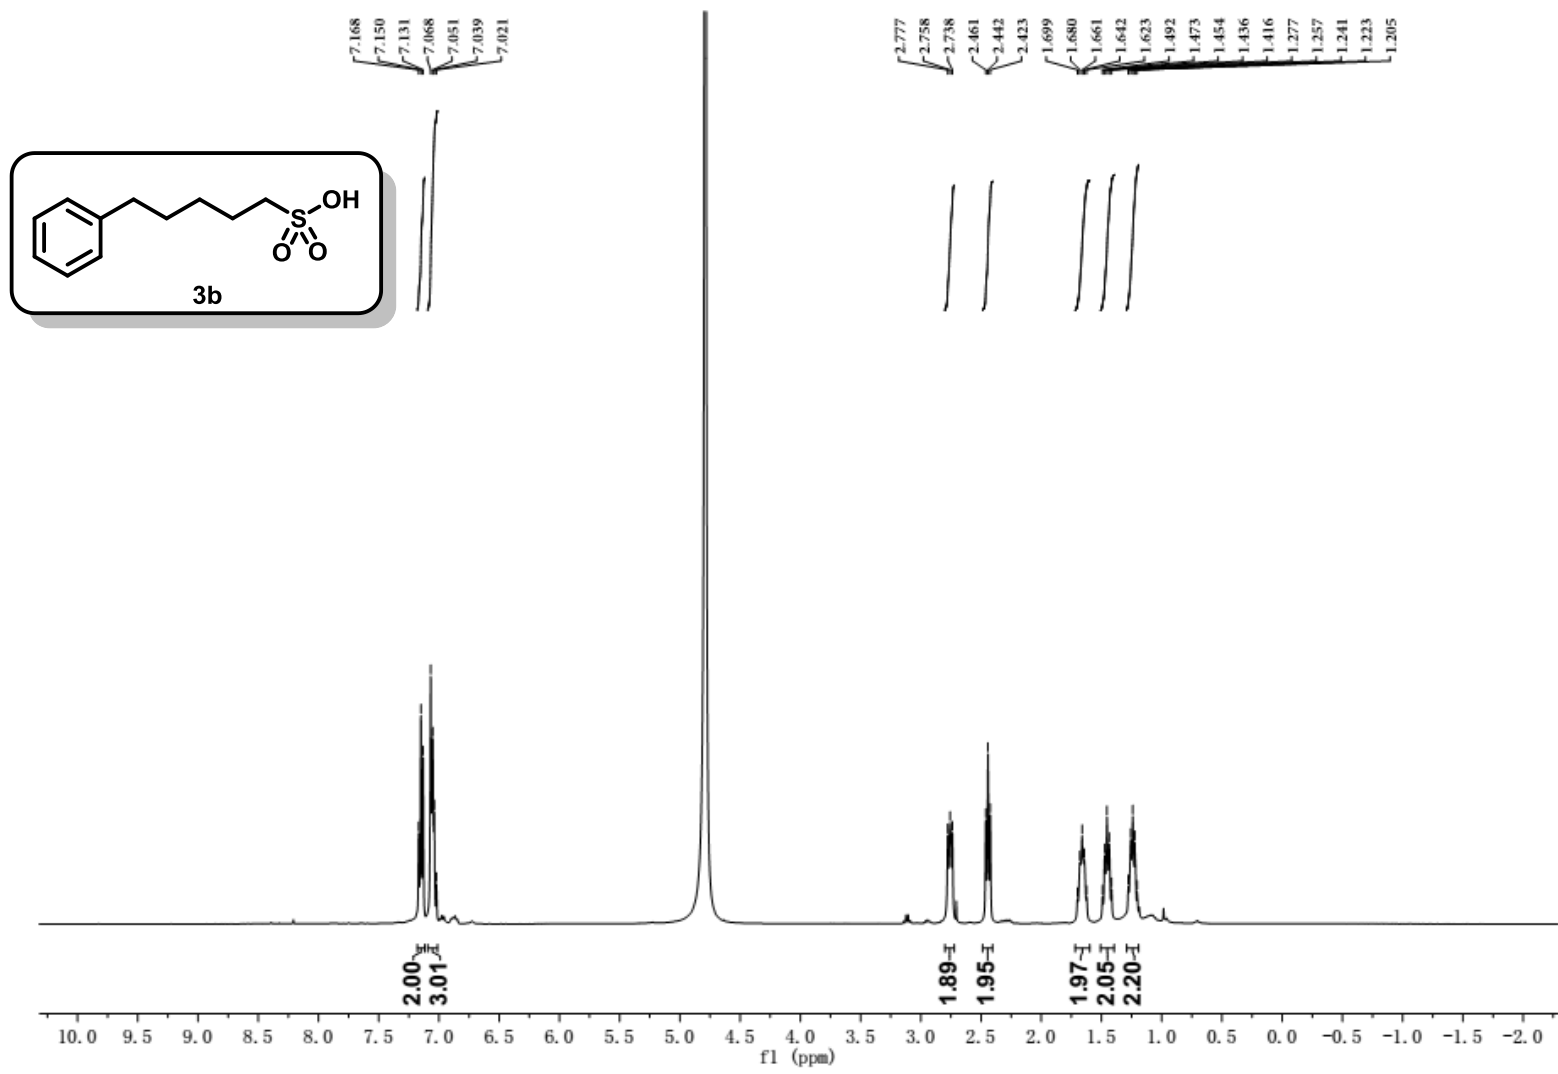

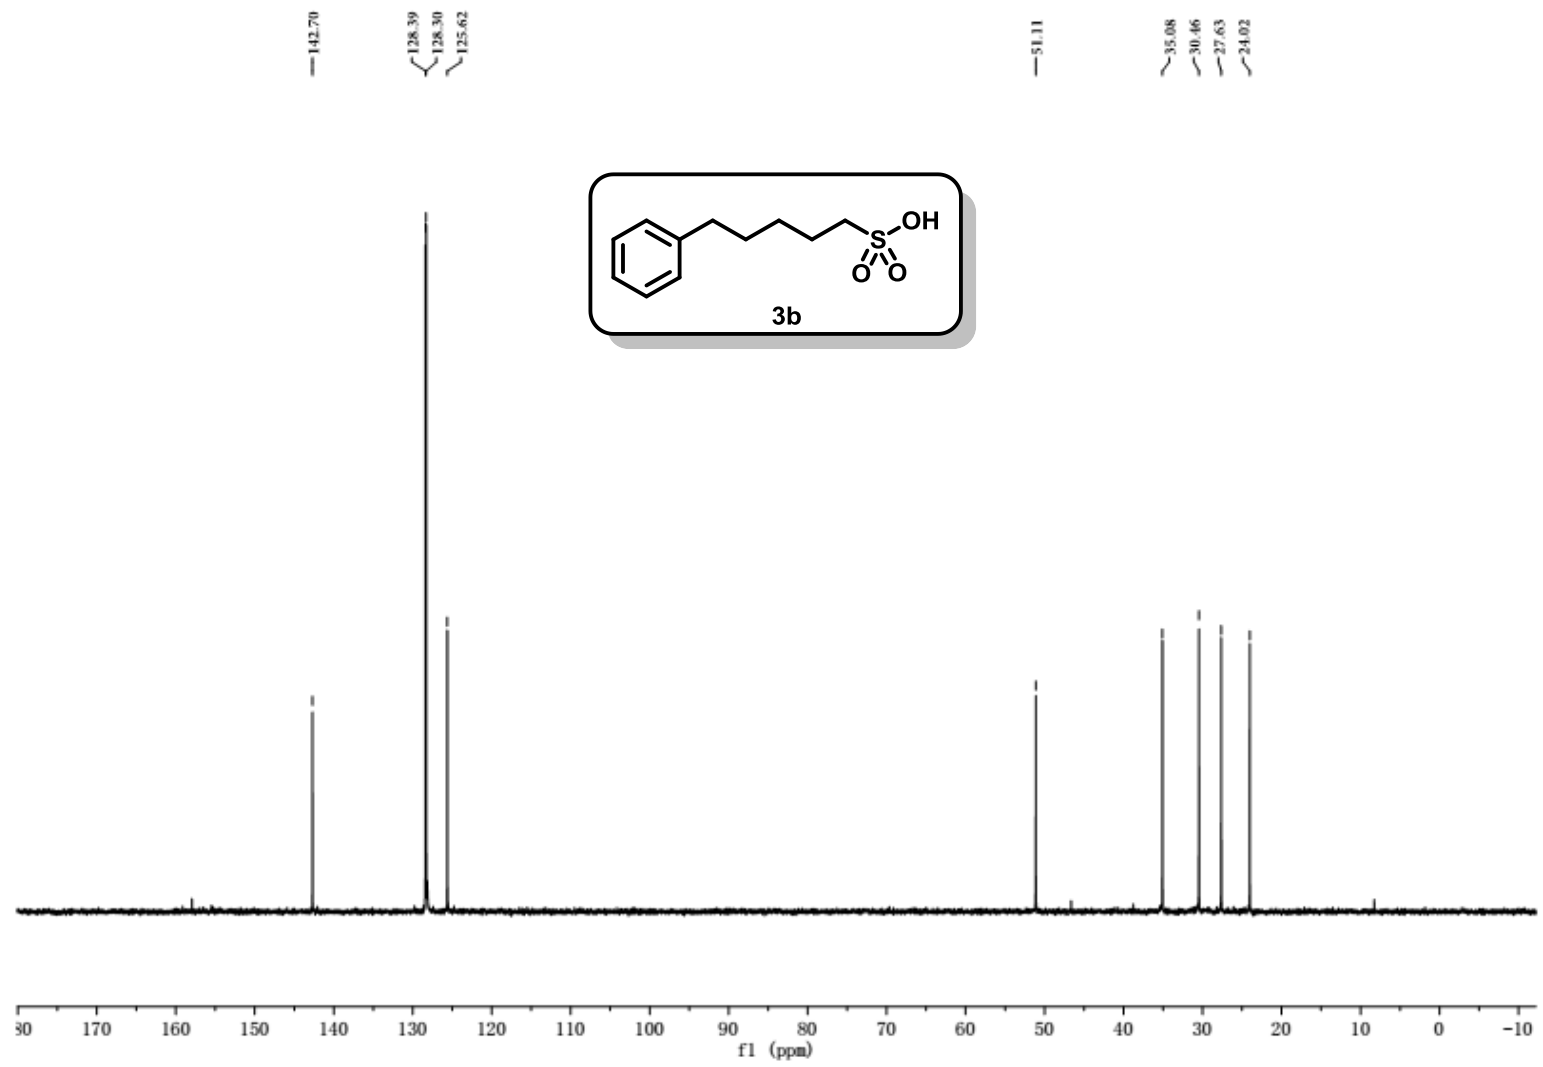

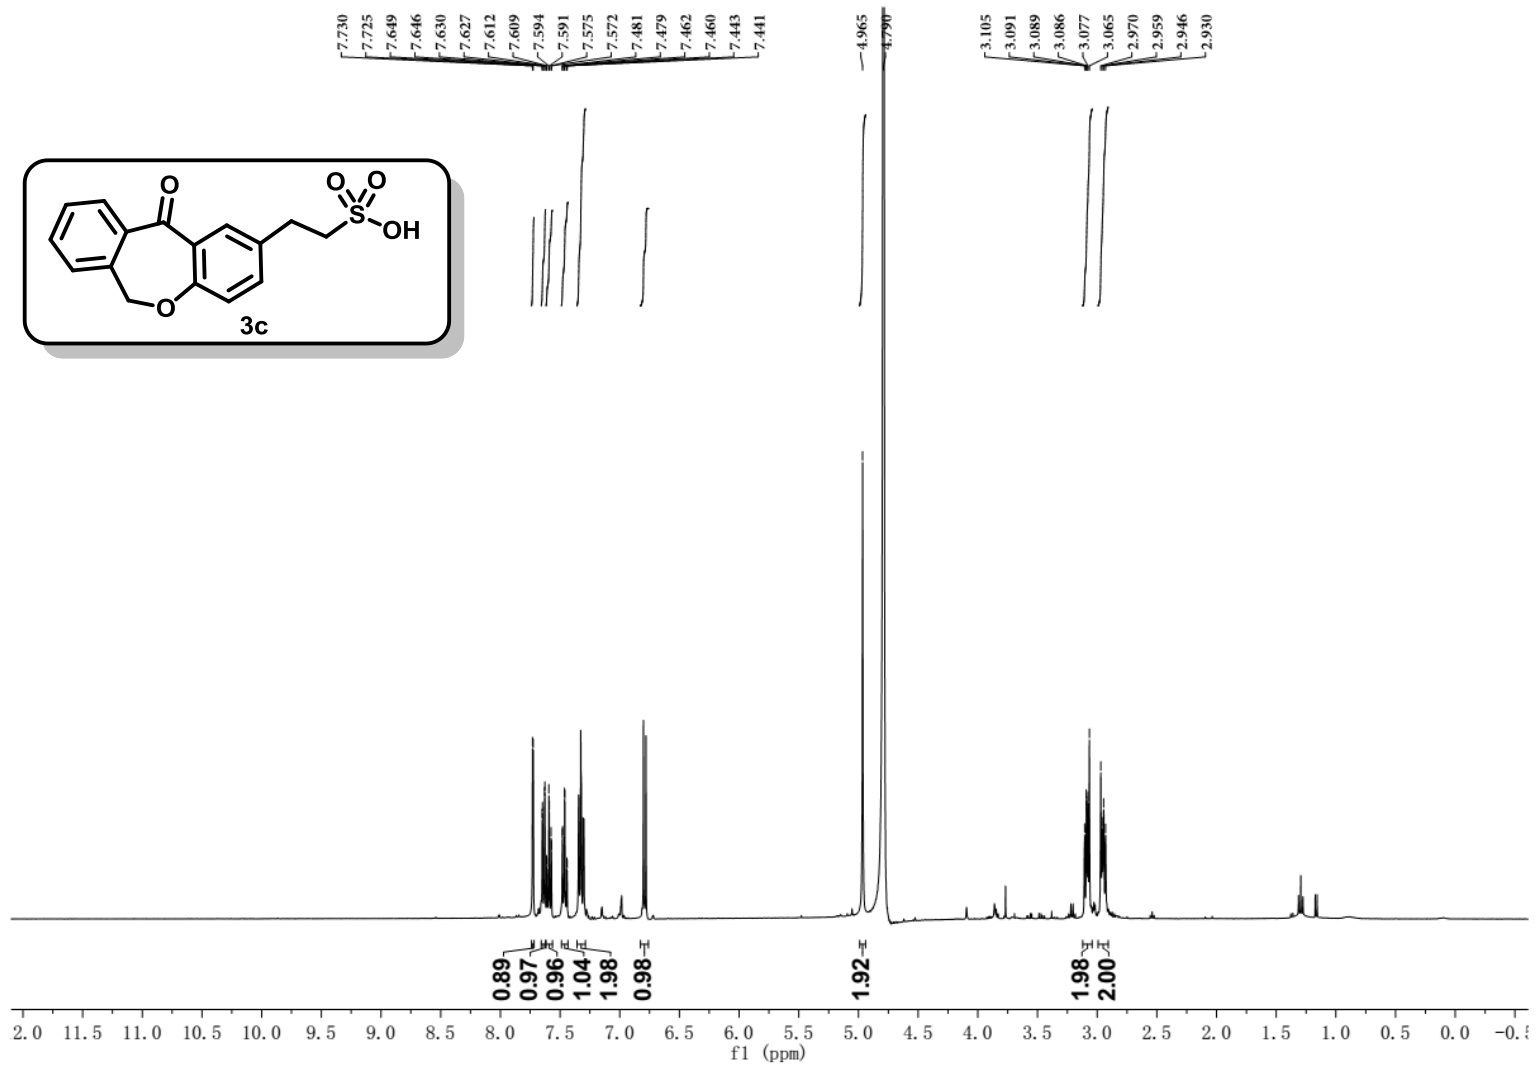

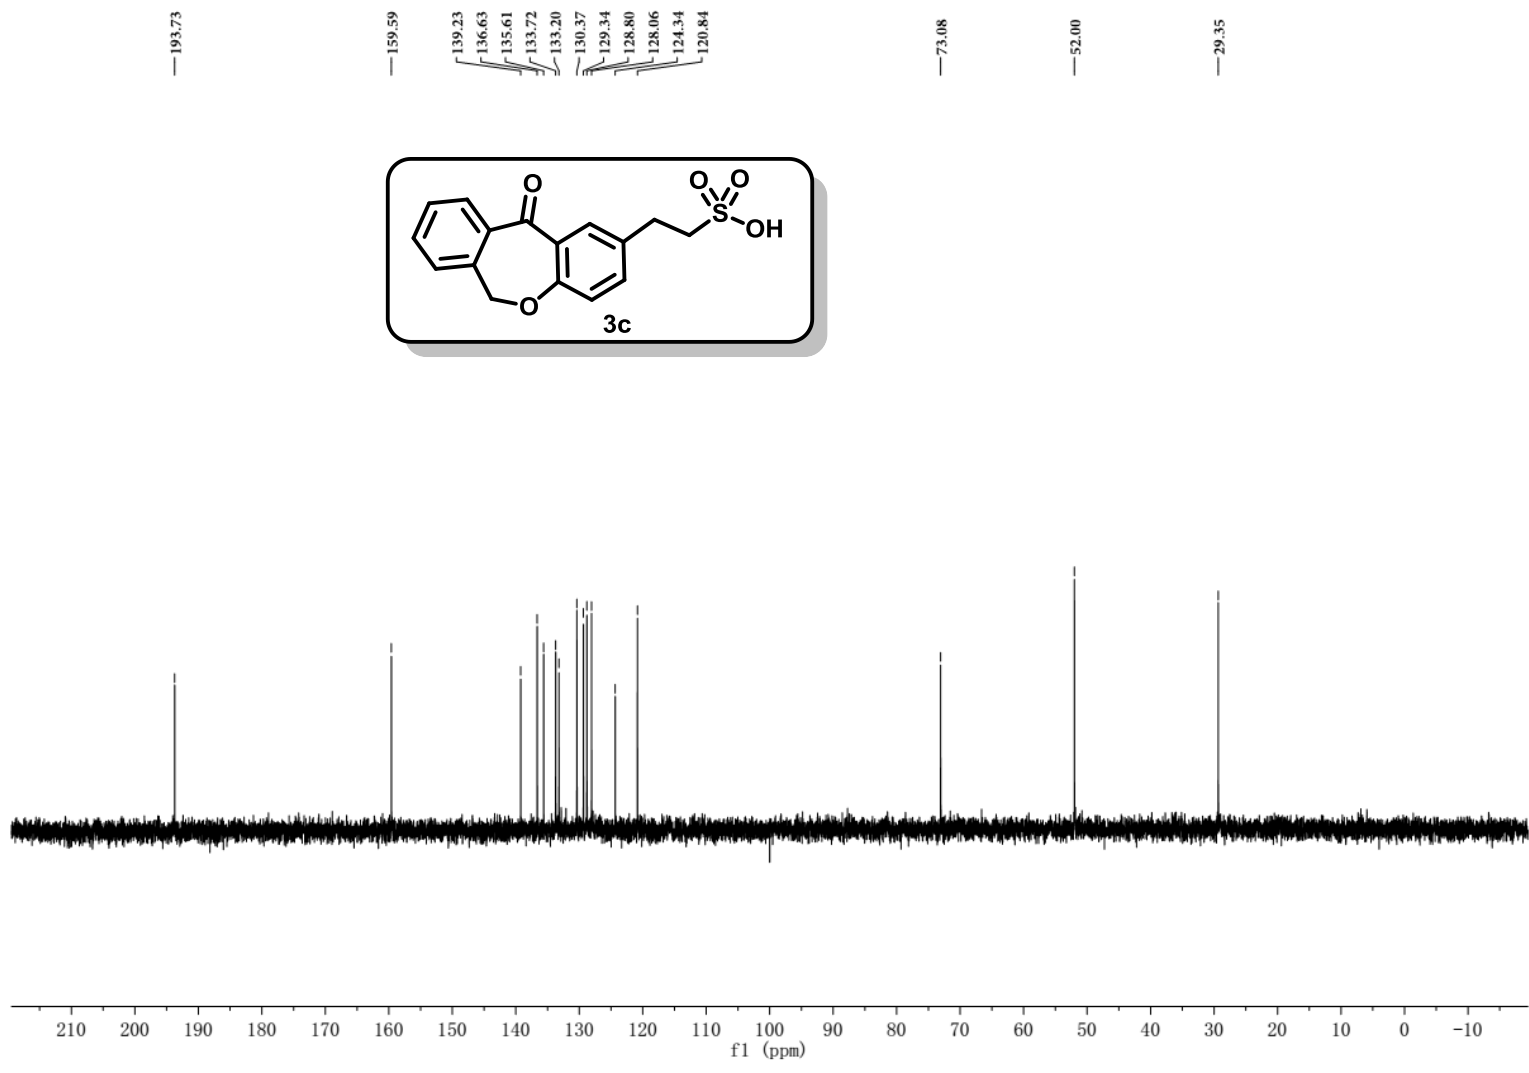

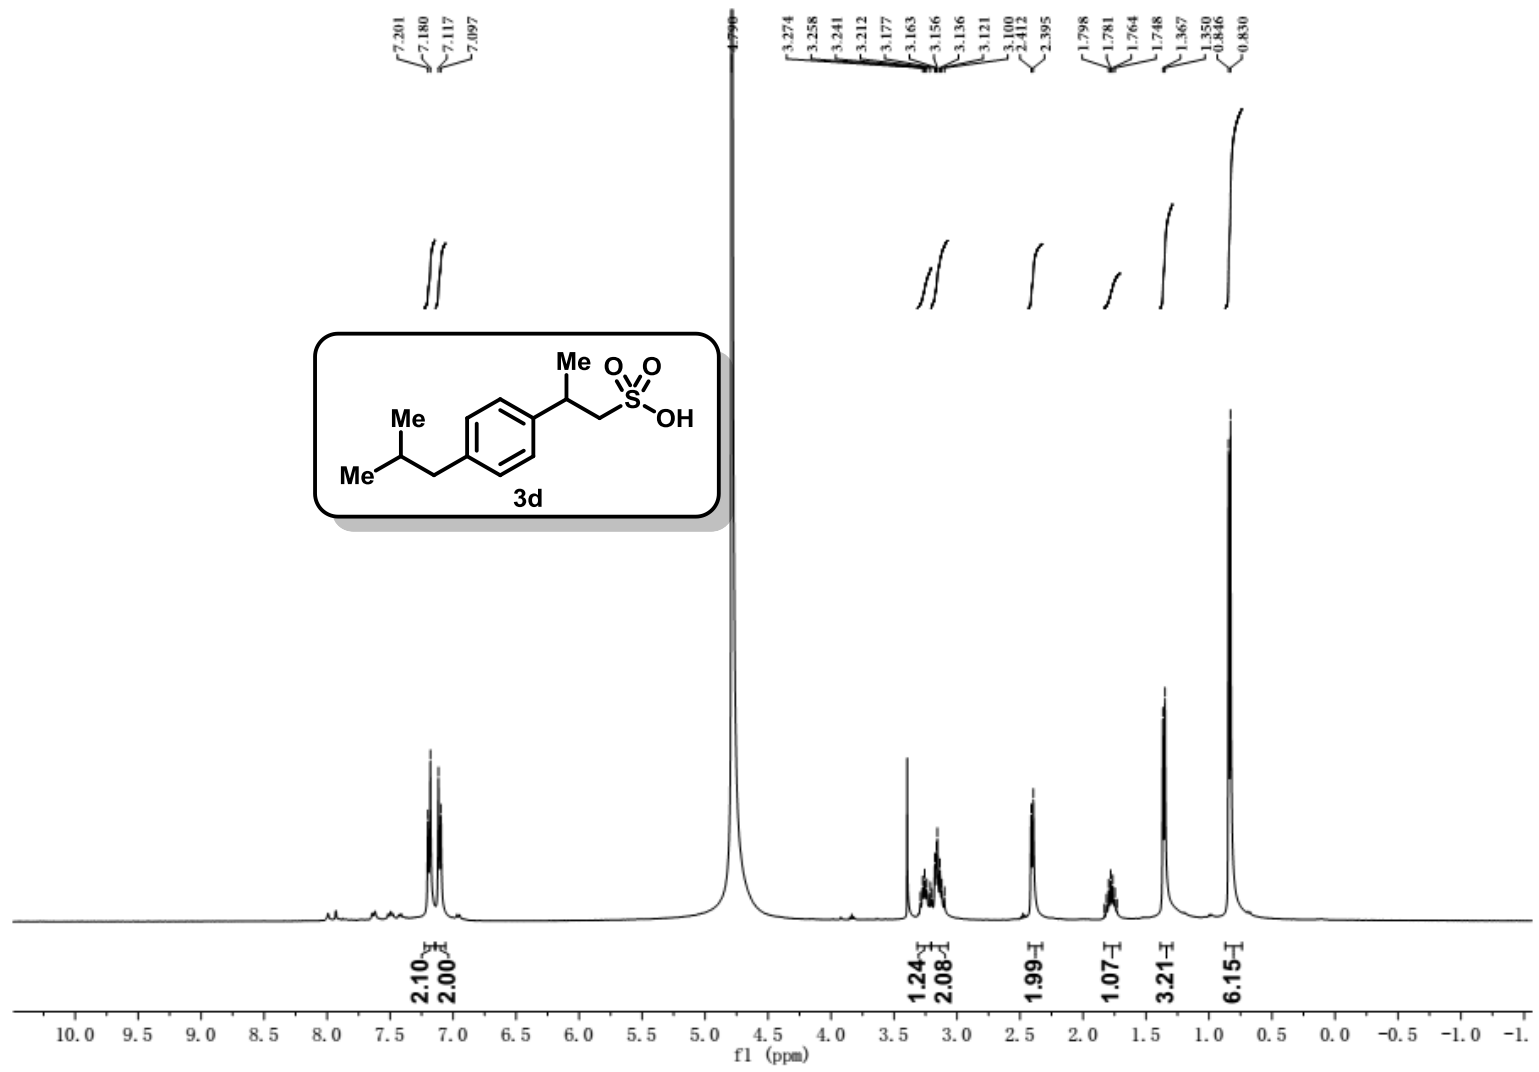

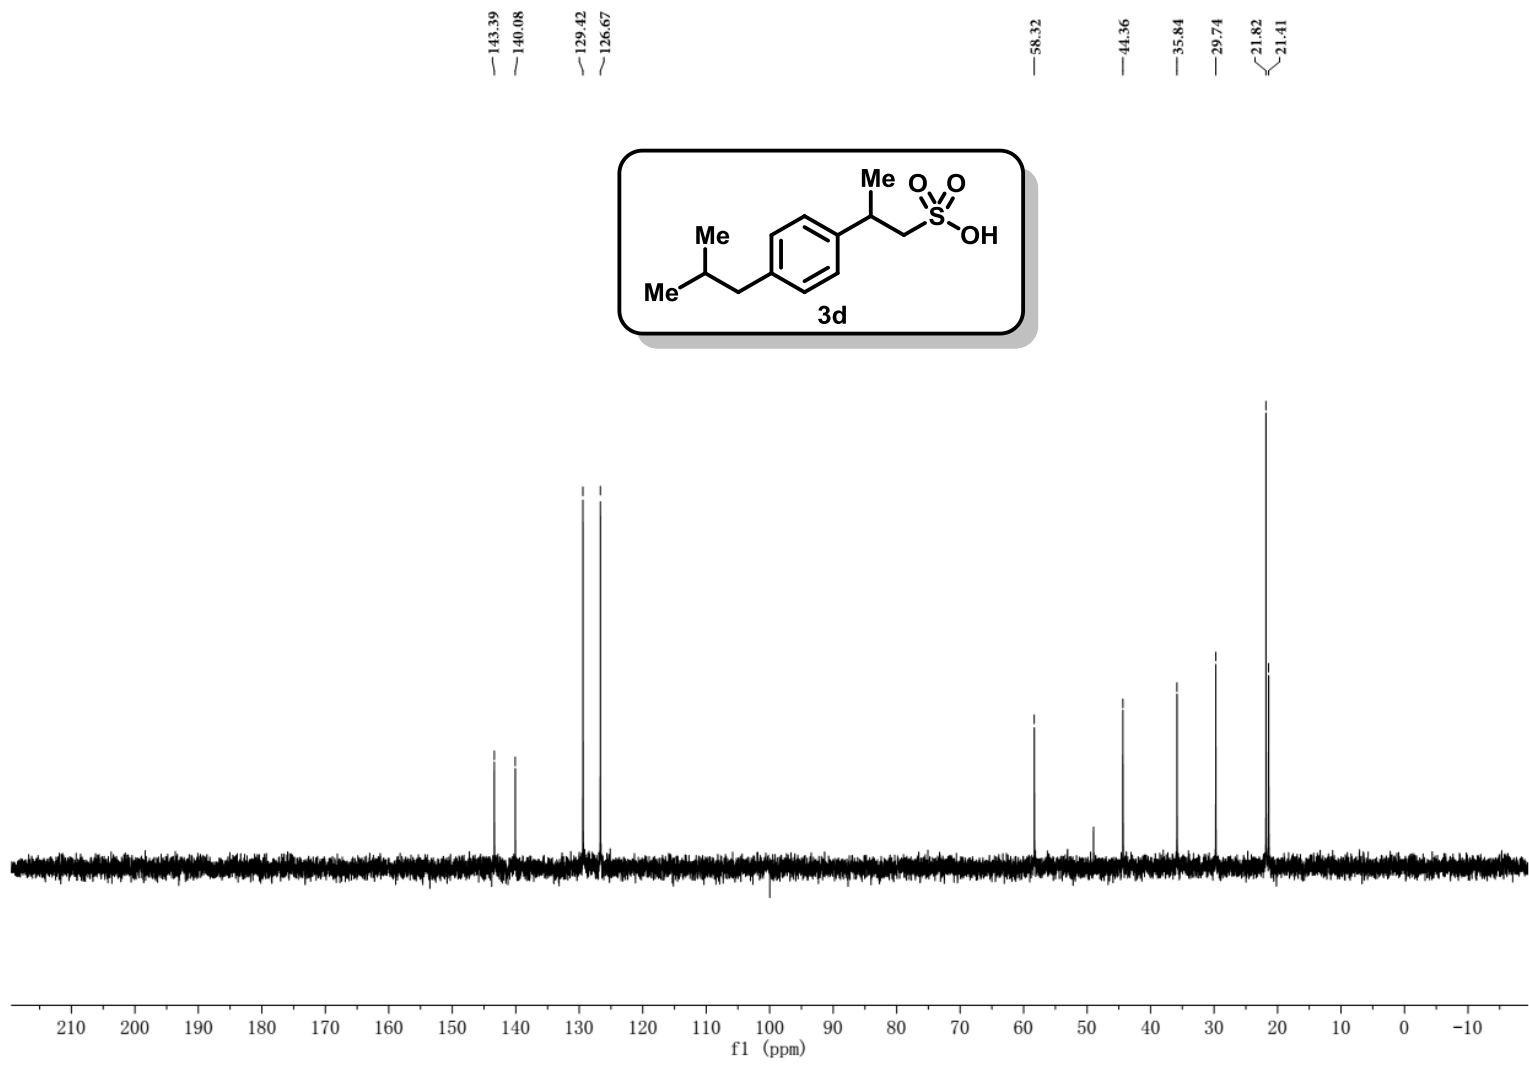



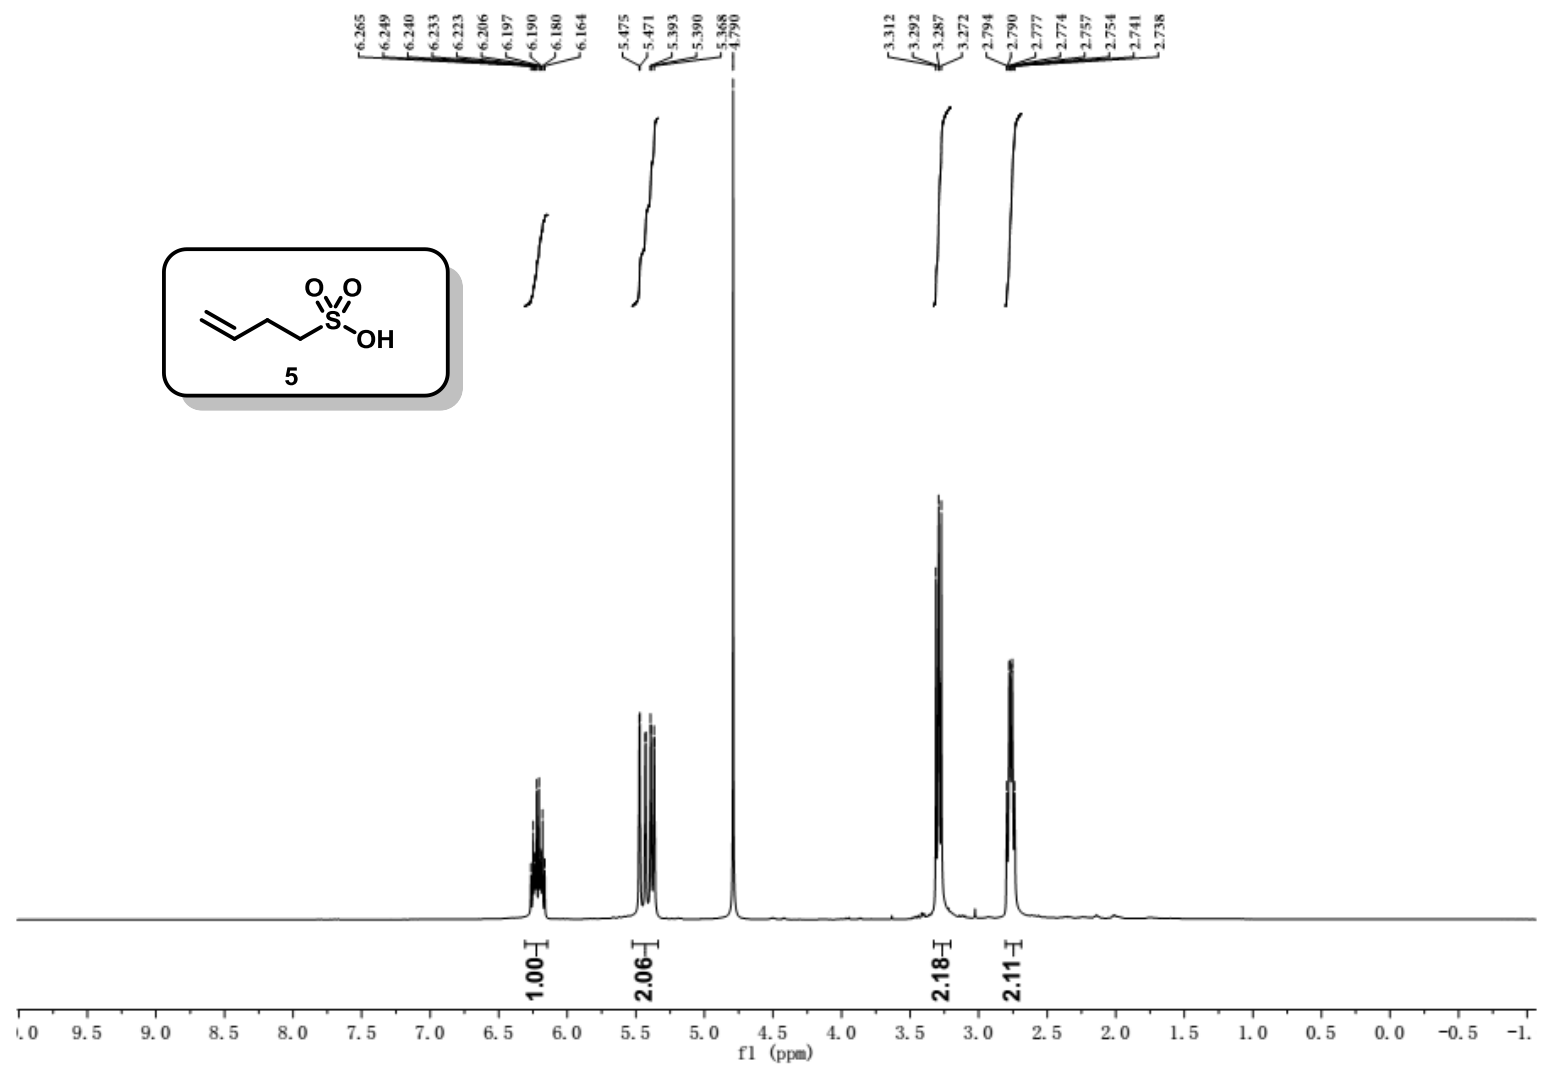

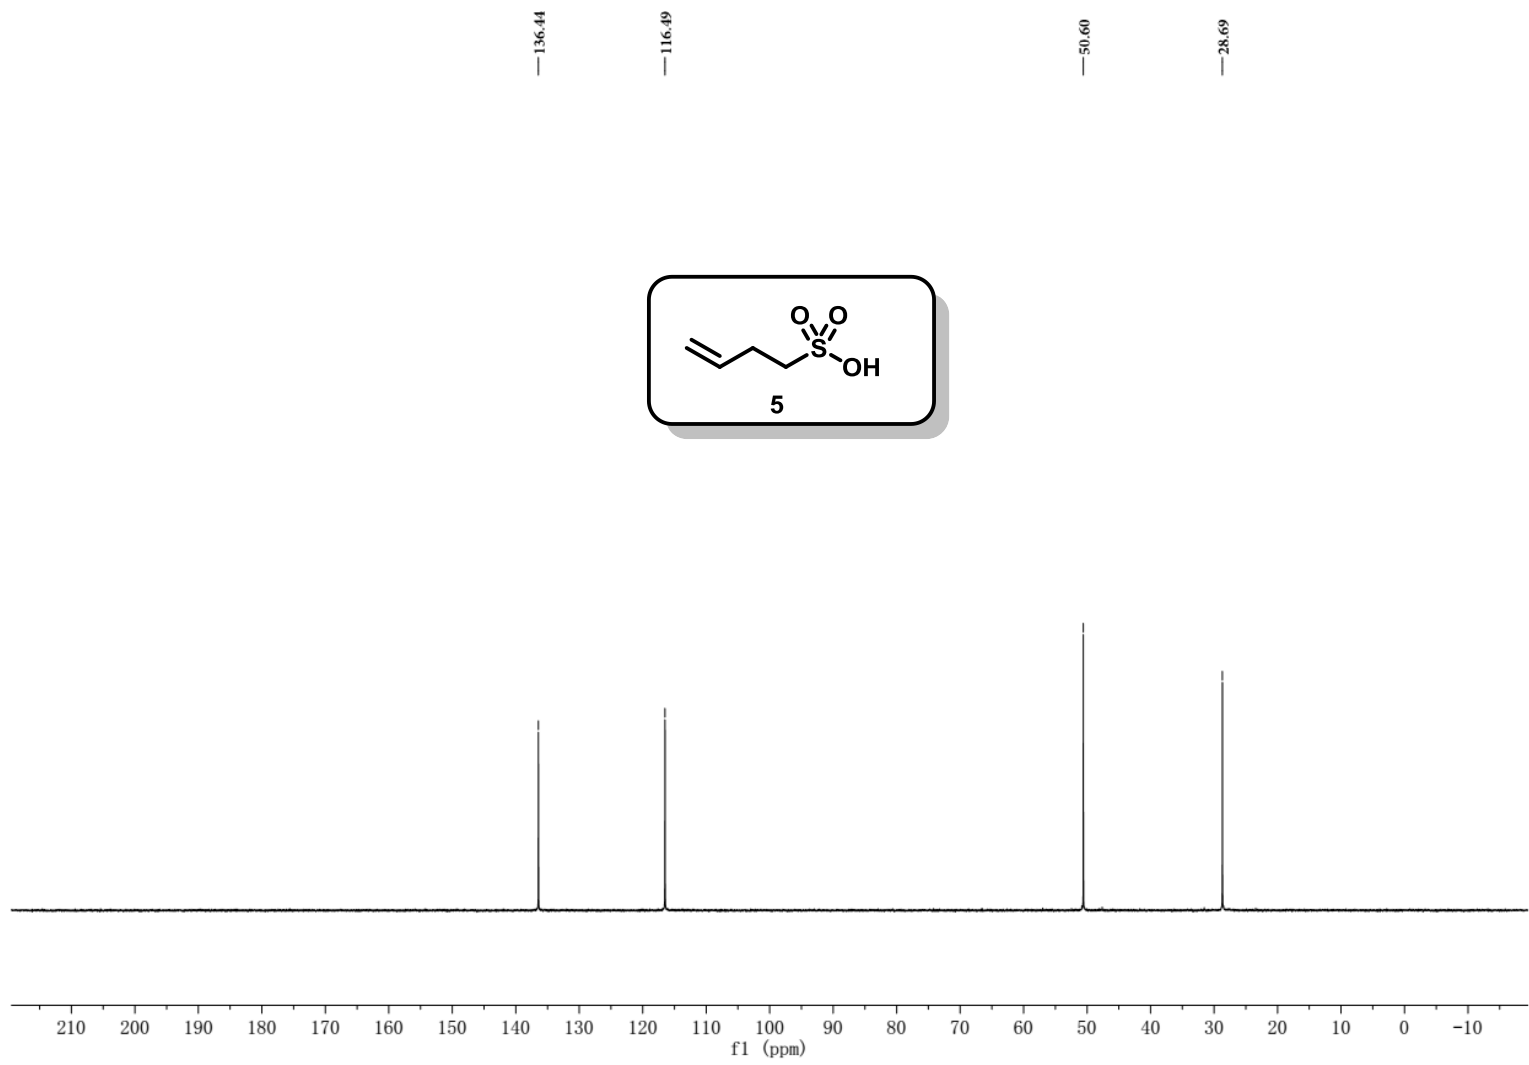

Supplement: d0gc03135f1.pdf [file d0gc03135f1.pdf]
